# Supplementary material
Source: publisher figshare collection journal article supplement (https://acs.figshare.com/ndownloader/files/33966706)
Supplement: Supplementary file 1 [file 33966706]

HEADER    TRANSFERASE/TRANSCRIPTION/INHIBITOR     16-MAY-12   4F7S
REMARK   4 4F7S COMPLIES WITH FORMAT V. 3.30,
REMARK 888
REMARK 888 WRITTEN BY MAESTRO (A PRODUCT OF SCHRODINGER, LLC)
TITLE     CRYSTAL STRUCTURE OF HUMAN CDK8/CYCC IN THE DMG-IN
TITLE    2 CONFORMATION
EXPDTA    X-RAY DIFFRACTION
REMARK   2 RESOLUTION.    2.20 ANGSTROMS
REMARK 200  TEMPERATURE           (KELVIN) : 100.00
REMARK 200  PH                             : 6.90
REMARK 350 BIOMOLECULE:  1
REMARK 350 APPLY THE FOLLOWING TO CHAINS: A, B
REMARK 350   BIOMT1  1   1.000000 0.000000 0.000000   0.000000
REMARK 350   BIOMT2  1   0.000000 1.000000 0.000000   0.000000
REMARK 350   BIOMT3  1   0.000000 0.000000 1.000000   0.000000
CRYST1   70.498   70.774  170.141  90.00  90.00  90.00 P 21 21 21    4
MODEL        1
ATOM      1  N   MET A   1     -15.064  82.648  73.617  1.00 64.31           N  
ANISOU    1  N   MET A   1     8013   7187   9235    417    678   1340
ATOM      2  CA  MET A   1     -13.690  82.865  73.129  1.00 61.28           C  
ANISOU    2  CA  MET A   1     7771   6919   8594    374    485   1273
ATOM      3  C   MET A   1     -13.531  84.374  72.834  1.00 56.72           C  
ANISOU    3  C   MET A   1     7270   6402   7882    399    358   1266
ATOM      4  O   MET A   1     -14.292  84.932  72.040  1.00 55.33           O  
ANISOU    4  O   MET A   1     6970   6248   7807    381    294   1271
ATOM      5  CB  MET A   1     -13.374  81.981  71.898  1.00 62.04           C  
ANISOU    5  CB  MET A   1     7727   7094   8750    242    317   1192
ATOM      6  CG  MET A   1     -11.920  82.075  71.394  1.00 64.83           C  
ANISOU    6  CG  MET A   1     8212   7531   8890    199    188   1137
ATOM      7  SD  MET A   1     -11.532  81.037  69.957  1.00 74.54           S  
ANISOU    7  SD  MET A   1     9323   8815  10185     77     75   1060
ATOM      8  CE  MET A   1     -11.636  79.383  70.695  1.00 58.71           C  
ANISOU    8  CE  MET A   1     7237   6686   8386     91    297   1094
ATOM      9  H1  MET A   1     -15.232  81.666  73.787  1.00  0.00           H  
ATOM     10  H2  MET A   1     -15.202  83.106  74.507  1.00  0.00           H  
ATOM     11  HA  MET A   1     -12.997  82.577  73.923  1.00  0.00           H  
ATOM     12  HB3 MET A   1     -14.051  82.226  71.077  1.00  0.00           H  
ATOM     13  HB2 MET A   1     -13.589  80.943  72.153  1.00  0.00           H  
ATOM     14  HG3 MET A   1     -11.230  81.818  72.198  1.00  0.00           H  
ATOM     15  HG2 MET A   1     -11.690  83.103  71.112  1.00  0.00           H  
ATOM     16  HE1 MET A   1     -11.330  78.632  69.968  1.00  0.00           H  
ATOM     17  HE2 MET A   1     -10.981  79.311  71.562  1.00  0.00           H  
ATOM     18  HE3 MET A   1     -12.657  79.159  71.005  1.00  0.00           H  
ATOM     19  N   ASP A   2     -12.518  84.992  73.470  1.00 52.07           N  
ANISOU   19  N   ASP A   2     6877   5826   7082    449    316   1245
ATOM     20  CA  ASP A   2     -12.116  86.390  73.285  1.00 50.21           C  
ANISOU   20  CA  ASP A   2     6715   5615   6746    478    218   1234
ATOM     21  C   ASP A   2     -11.740  86.689  71.817  1.00 47.37           C  
ANISOU   21  C   ASP A   2     6257   5347   6395    369     45   1192
ATOM     22  O   ASP A   2     -10.981  85.927  71.215  1.00 42.92           O  
ANISOU   22  O   ASP A   2     5675   4832   5801    290    -36   1143
ATOM     23  CB  ASP A   2     -10.980  86.763  74.269  1.00 52.31           C  
ANISOU   23  CB  ASP A   2     7192   5851   6832    560    186   1190
ATOM     24  CG  ASP A   2     -10.418  88.180  74.093  1.00 49.92           C  
ANISOU   24  CG  ASP A   2     6948   5546   6473    589     94   1169
ATOM     25  OD1 ASP A   2     -11.236  89.125  74.126  1.00 53.62           O  
ANISOU   25  OD1 ASP A   2     7480   5959   6935    693    176   1216
ATOM     26  OD2 ASP A   2      -9.181  88.290  73.954  1.00 50.70           O1-
ANISOU   26  OD2 ASP A   2     7028   5684   6552    512    -41   1110
ATOM     27  H   ASP A   2     -11.942  84.460  74.105  1.00  0.00           H  
ATOM     28  HA  ASP A   2     -12.988  86.995  73.541  1.00  0.00           H  
ATOM     29  HB3 ASP A   2     -10.166  86.045  74.172  1.00  0.00           H  
ATOM     30  HB2 ASP A   2     -11.321  86.667  75.300  1.00  0.00           H  
ATOM     31  N   TYR A   3     -12.281  87.801  71.291  1.00 45.16           N  
ANISOU   31  N   TYR A   3     5935   5080   6144    385      7   1218
ATOM     32  CA  TYR A   3     -12.080  88.261  69.918  1.00 44.49           C  
ANISOU   32  CA  TYR A   3     5783   5065   6055    327   -127   1198
ATOM     33  C   TYR A   3     -10.628  88.668  69.617  1.00 43.91           C  
ANISOU   33  C   TYR A   3     5810   5009   5864    290   -202   1161
ATOM     34  O   TYR A   3     -10.113  88.268  68.575  1.00 44.94           O  
ANISOU   34  O   TYR A   3     5912   5189   5974    233   -278   1139
ATOM     35  CB  TYR A   3     -13.077  89.396  69.604  1.00 44.60           C  
ANISOU   35  CB  TYR A   3     5748   5075   6121    382   -136   1242
ATOM     36  CG  TYR A   3     -12.959  89.985  68.207  1.00 47.80           C  
ANISOU   36  CG  TYR A   3     6141   5540   6482    368   -260   1232
ATOM     37  CD1 TYR A   3     -13.479  89.283  67.100  1.00 48.11           C  
ANISOU   37  CD1 TYR A   3     6078   5630   6571    351   -365   1197
ATOM     38  CD2 TYR A   3     -12.305  91.220  68.008  1.00 48.73           C  
ANISOU   38  CD2 TYR A   3     6364   5645   6507    391   -269   1252
ATOM     39  CE1 TYR A   3     -13.345  89.811  65.801  1.00 51.44           C  
ANISOU   39  CE1 TYR A   3     6539   6097   6910    384   -473   1193
ATOM     40  CE2 TYR A   3     -12.168  91.746  66.709  1.00 49.35           C  
ANISOU   40  CE2 TYR A   3     6464   5756   6531    406   -340   1263
ATOM     41  CZ  TYR A   3     -12.688  91.043  65.605  1.00 51.11           C  
ANISOU   41  CZ  TYR A   3     6621   6037   6762    416   -440   1238
ATOM     42  OH  TYR A   3     -12.547  91.551  64.347  1.00 53.12           O  
ANISOU   42  OH  TYR A   3     6944   6315   6922    475   -504   1254
ATOM     43  H   TYR A   3     -12.865  88.384  71.874  1.00  0.00           H  
ATOM     44  HA  TYR A   3     -12.323  87.421  69.264  1.00  0.00           H  
ATOM     45  HB3 TYR A   3     -12.956  90.202  70.330  1.00  0.00           H  
ATOM     46  HB2 TYR A   3     -14.097  89.032  69.733  1.00  0.00           H  
ATOM     47  HD1 TYR A   3     -13.975  88.335  67.244  1.00  0.00           H  
ATOM     48  HD2 TYR A   3     -11.895  91.761  68.848  1.00  0.00           H  
ATOM     49  HE1 TYR A   3     -13.744  89.266  64.959  1.00  0.00           H  
ATOM     50  HE2 TYR A   3     -11.660  92.688  66.563  1.00  0.00           H  
ATOM     51  HH  TYR A   3     -12.940  90.998  63.668  1.00  0.00           H  
ATOM     52  N   ASP A   4     -10.001  89.432  70.530  1.00 42.63           N  
ANISOU   52  N   ASP A   4     5762   4791   5643    333   -179   1147
ATOM     53  CA  ASP A   4      -8.623  89.928  70.405  1.00 41.75           C  
ANISOU   53  CA  ASP A   4     5712   4659   5491    297   -242   1096
ATOM     54  C   ASP A   4      -7.587  88.791  70.373  1.00 42.67           C  
ANISOU   54  C   ASP A   4     5833   4793   5588    238   -274   1039
ATOM     55  O   ASP A   4      -6.685  88.823  69.537  1.00 41.82           O  
ANISOU   55  O   ASP A   4     5707   4696   5486    174   -316   1016
ATOM     56  CB  ASP A   4      -8.244  90.986  71.469  1.00 42.24           C  
ANISOU   56  CB  ASP A   4     5879   4636   5535    370   -242   1061
ATOM     57  CG  ASP A   4      -9.206  92.177  71.579  1.00 47.15           C  
ANISOU   57  CG  ASP A   4     6508   5233   6173    431   -205   1118
ATOM     58  OD1 ASP A   4      -9.962  92.425  70.613  1.00 49.87           O  
ANISOU   58  OD1 ASP A   4     6782   5619   6545    408   -202   1175
ATOM     59  OD2 ASP A   4      -9.113  92.873  72.613  1.00 54.83           O1-
ANISOU   59  OD2 ASP A   4     7572   6141   7119    522   -184   1103
ATOM     60  H   ASP A   4     -10.495  89.716  71.365  1.00  0.00           H  
ATOM     61  HA  ASP A   4      -8.566  90.430  69.439  1.00  0.00           H  
ATOM     62  HB3 ASP A   4      -7.247  91.377  71.258  1.00  0.00           H  
ATOM     63  HB2 ASP A   4      -8.210  90.498  72.444  1.00  0.00           H  
ATOM     64  N   PHE A   5      -7.785  87.785  71.240  1.00 42.37           N  
ANISOU   64  N   PHE A   5     5830   4743   5525    275   -232   1025
ATOM     65  CA  PHE A   5      -7.068  86.511  71.268  1.00 42.85           C  
ANISOU   65  CA  PHE A   5     5892   4825   5564    230   -248    981
ATOM     66  C   PHE A   5      -7.196  85.701  69.964  1.00 41.48           C  
ANISOU   66  C   PHE A   5     5607   4724   5429    135   -276    997
ATOM     67  O   PHE A   5      -6.191  85.202  69.460  1.00 40.31           O  
ANISOU   67  O   PHE A   5     5456   4596   5263     74   -326    960
ATOM     68  CB  PHE A   5      -7.542  85.737  72.519  1.00 43.43           C  
ANISOU   68  CB  PHE A   5     6031   4862   5608    313   -153    995
ATOM     69  CG  PHE A   5      -7.163  84.272  72.662  1.00 42.09           C  
ANISOU   69  CG  PHE A   5     5864   4709   5419    280   -143    966
ATOM     70  CD1 PHE A   5      -5.883  83.909  73.130  1.00 47.57           C  
ANISOU   70  CD1 PHE A   5     6655   5381   6037    304   -213    887
ATOM     71  CD2 PHE A   5      -8.053  83.261  72.239  1.00 46.41           C  
ANISOU   71  CD2 PHE A   5     6311   5278   6046    234    -67   1007
ATOM     72  CE1 PHE A   5      -5.544  82.567  73.248  1.00 43.98           C  
ANISOU   72  CE1 PHE A   5     6212   4940   5556    284   -198    863
ATOM     73  CE2 PHE A   5      -7.694  81.925  72.362  1.00 43.42           C  
ANISOU   73  CE2 PHE A   5     5939   4905   5656    205    -45    982
ATOM     74  CZ  PHE A   5      -6.450  81.580  72.876  1.00 38.56           C  
ANISOU   74  CZ  PHE A   5     5437   4280   4934    232   -104    918
ATOM     75  H   PHE A   5      -8.527  87.881  71.923  1.00  0.00           H  
ATOM     76  HA  PHE A   5      -6.007  86.733  71.397  1.00  0.00           H  
ATOM     77  HB3 PHE A   5      -8.628  85.793  72.572  1.00  0.00           H  
ATOM     78  HB2 PHE A   5      -7.181  86.257  73.407  1.00  0.00           H  
ATOM     79  HD1 PHE A   5      -5.173  84.671  73.417  1.00  0.00           H  
ATOM     80  HD2 PHE A   5      -9.022  83.521  71.836  1.00  0.00           H  
ATOM     81  HE1 PHE A   5      -4.571  82.289  73.626  1.00  0.00           H  
ATOM     82  HE2 PHE A   5      -8.385  81.153  72.055  1.00  0.00           H  
ATOM     83  HZ  PHE A   5      -6.177  80.539  72.969  1.00  0.00           H  
ATOM     84  N   LYS A   6      -8.430  85.610  69.439  1.00 43.54           N  
ANISOU   84  N   LYS A   6     5778   5013   5752    137   -254   1042
ATOM     85  CA  LYS A   6      -8.783  84.853  68.239  1.00 44.62           C  
ANISOU   85  CA  LYS A   6     5818   5210   5927     81   -317   1034
ATOM     86  C   LYS A   6      -8.173  85.430  66.947  1.00 44.84           C  
ANISOU   86  C   LYS A   6     5876   5270   5891     63   -392   1032
ATOM     87  O   LYS A   6      -7.608  84.659  66.170  1.00 45.72           O  
ANISOU   87  O   LYS A   6     5988   5415   5969     20   -435   1006
ATOM     88  CB  LYS A   6     -10.319  84.716  68.177  1.00 44.95           C  
ANISOU   88  CB  LYS A   6     5743   5252   6085    111   -311   1058
ATOM     89  CG  LYS A   6     -10.861  83.896  66.994  1.00 50.74           C  
ANISOU   89  CG  LYS A   6     6363   6024   6893     74   -400   1014
ATOM     90  CD  LYS A   6     -12.385  83.725  67.068  1.00 53.44           C  
ANISOU   90  CD  LYS A   6     6549   6333   7423    105   -397   1012
ATOM     91  CE  LYS A   6     -12.942  82.885  65.912  0.00 57.14           C  
ANISOU   91  CE  LYS A   6     6890   6824   7998     81   -531    933
ATOM     92  NZ  LYS A   6     -14.403  82.731  66.021  0.00 58.70           N1+
ANISOU   92  NZ  LYS A   6     6894   6965   8445    110   -548    905
ATOM     93  H   LYS A   6      -9.200  86.061  69.916  1.00  0.00           H  
ATOM     94  HA  LYS A   6      -8.372  83.849  68.369  1.00  0.00           H  
ATOM     95  HB3 LYS A   6     -10.777  85.706  68.161  1.00  0.00           H  
ATOM     96  HB2 LYS A   6     -10.657  84.244  69.100  1.00  0.00           H  
ATOM     97  HG3 LYS A   6     -10.381  82.917  66.983  1.00  0.00           H  
ATOM     98  HG2 LYS A   6     -10.604  84.380  66.051  1.00  0.00           H  
ATOM     99  HD3 LYS A   6     -12.857  84.708  67.068  1.00  0.00           H  
ATOM    100  HD2 LYS A   6     -12.650  83.260  68.019  1.00  0.00           H  
ATOM    101  HE3 LYS A   6     -12.485  81.895  65.908  1.00  0.00           H  
ATOM    102  HE2 LYS A   6     -12.708  83.354  64.955  1.00  0.00           H  
ATOM    103  HZ1 LYS A   6     -14.629  82.271  66.892  1.00  0.00           H  
ATOM    104  HZ2 LYS A   6     -14.841  83.641  66.000  1.00  0.00           H  
ATOM    105  HZ3 LYS A   6     -14.744  82.176  65.249  1.00  0.00           H  
ATOM    106  N   VAL A   7      -8.279  86.757  66.744  1.00 44.42           N  
ANISOU  106  N   VAL A   7     5859   5196   5821    108   -387   1070
ATOM    107  CA  VAL A   7      -7.738  87.439  65.561  1.00 41.88           C  
ANISOU  107  CA  VAL A   7     5589   4880   5445    120   -410   1093
ATOM    108  C   VAL A   7      -6.204  87.591  65.591  1.00 40.39           C  
ANISOU  108  C   VAL A   7     5456   4642   5248     72   -372   1073
ATOM    109  O   VAL A   7      -5.599  87.602  64.520  1.00 39.33           O  
ANISOU  109  O   VAL A   7     5356   4507   5078     66   -362   1088
ATOM    110  CB  VAL A   7      -8.370  88.837  65.314  1.00 43.74           C  
ANISOU  110  CB  VAL A   7     5851   5094   5675    195   -397   1148
ATOM    111  CG1 VAL A   7      -9.886  88.741  65.074  1.00 45.62           C  
ANISOU  111  CG1 VAL A   7     6012   5378   5946    249   -461   1153
ATOM    112  CG2 VAL A   7      -8.032  89.911  66.367  1.00 36.26           C  
ANISOU  112  CG2 VAL A   7     4935   4076   4766    206   -335   1154
ATOM    113  H   VAL A   7      -8.763  87.336  67.420  1.00  0.00           H  
ATOM    114  HA  VAL A   7      -7.980  86.823  64.693  1.00  0.00           H  
ATOM    115  HB  VAL A   7      -7.960  89.207  64.373  1.00  0.00           H  
ATOM    116 HG11 VAL A   7     -10.294  89.711  64.790  1.00  0.00           H  
ATOM    117 HG12 VAL A   7     -10.113  88.044  64.268  1.00  0.00           H  
ATOM    118 HG13 VAL A   7     -10.419  88.406  65.963  1.00  0.00           H  
ATOM    119 HG21 VAL A   7      -8.592  90.829  66.190  1.00  0.00           H  
ATOM    120 HG22 VAL A   7      -8.274  89.567  67.368  1.00  0.00           H  
ATOM    121 HG23 VAL A   7      -6.975  90.176  66.357  1.00  0.00           H  
ATOM    122  N   LYS A   8      -5.602  87.654  66.795  1.00 39.13           N  
ANISOU  122  N   LYS A   8     5310   4428   5130     57   -352   1033
ATOM    123  CA  LYS A   8      -4.150  87.624  66.990  1.00 40.88           C  
ANISOU  123  CA  LYS A   8     5550   4589   5394     13   -346    980
ATOM    124  C   LYS A   8      -3.555  86.273  66.562  1.00 40.60           C  
ANISOU  124  C   LYS A   8     5497   4598   5330    -42   -364    952
ATOM    125  O   LYS A   8      -2.604  86.264  65.786  1.00 39.29           O  
ANISOU  125  O   LYS A   8     5335   4403   5191    -76   -337    952
ATOM    126  CB  LYS A   8      -3.801  88.000  68.448  1.00 41.41           C  
ANISOU  126  CB  LYS A   8     5646   4591   5499     42   -373    911
ATOM    127  CG  LYS A   8      -2.315  87.881  68.855  1.00 47.37           C  
ANISOU  127  CG  LYS A   8     6398   5274   6328     12   -414    817
ATOM    128  CD  LYS A   8      -1.349  88.728  68.006  1.00 47.22           C  
ANISOU  128  CD  LYS A   8     6335   5168   6437    -32   -368    822
ATOM    129  CE  LYS A   8       0.095  88.656  68.523  1.00 52.27           C  
ANISOU  129  CE  LYS A   8     6934   5707   7218    -58   -424    704
ATOM    130  NZ  LYS A   8       1.019  89.421  67.667  1.00 50.36           N1+
ANISOU  130  NZ  LYS A   8     6622   5351   7162   -110   -335    717
ATOM    131  H   LYS A   8      -6.164  87.664  67.635  1.00  0.00           H  
ATOM    132  HA  LYS A   8      -3.727  88.392  66.340  1.00  0.00           H  
ATOM    133  HB3 LYS A   8      -4.378  87.370  69.126  1.00  0.00           H  
ATOM    134  HB2 LYS A   8      -4.134  89.022  68.637  1.00  0.00           H  
ATOM    135  HG3 LYS A   8      -2.004  86.836  68.829  1.00  0.00           H  
ATOM    136  HG2 LYS A   8      -2.225  88.183  69.899  1.00  0.00           H  
ATOM    137  HD3 LYS A   8      -1.687  89.765  68.000  1.00  0.00           H  
ATOM    138  HD2 LYS A   8      -1.374  88.395  66.969  1.00  0.00           H  
ATOM    139  HE3 LYS A   8       0.435  87.622  68.565  1.00  0.00           H  
ATOM    140  HE2 LYS A   8       0.150  89.054  69.536  1.00  0.00           H  
ATOM    141  HZ1 LYS A   8       1.056  89.014  66.737  1.00  0.00           H  
ATOM    142  HZ2 LYS A   8       0.712  90.380  67.599  1.00  0.00           H  
ATOM    143  HZ3 LYS A   8       1.948  89.393  68.062  1.00  0.00           H  
ATOM    144  N   LEU A   9      -4.161  85.165  67.022  1.00 39.92           N  
ANISOU  144  N   LEU A   9     5391   4568   5207    -47   -389    935
ATOM    145  CA  LEU A   9      -3.770  83.809  66.635  1.00 39.76           C  
ANISOU  145  CA  LEU A   9     5354   4588   5163    -98   -406    906
ATOM    146  C   LEU A   9      -4.006  83.510  65.147  1.00 40.10           C  
ANISOU  146  C   LEU A   9     5391   4680   5165   -106   -422    940
ATOM    147  O   LEU A   9      -3.200  82.787  64.574  1.00 37.46           O  
ANISOU  147  O   LEU A   9     5076   4348   4810   -138   -415    929
ATOM    148  CB  LEU A   9      -4.501  82.773  67.510  1.00 40.18           C  
ANISOU  148  CB  LEU A   9     5390   4667   5211    -93   -400    886
ATOM    149  CG  LEU A   9      -4.006  82.716  68.968  1.00 39.04           C  
ANISOU  149  CG  LEU A   9     5309   4469   5055    -51   -386    843
ATOM    150  CD1 LEU A   9      -4.985  81.892  69.823  1.00 40.45           C  
ANISOU  150  CD1 LEU A   9     5492   4651   5228    -13   -323    861
ATOM    151  CD2 LEU A   9      -2.553  82.203  69.077  1.00 37.21           C  
ANISOU  151  CD2 LEU A   9     5102   4215   4820    -81   -425    775
ATOM    152  H   LEU A   9      -4.942  85.245  67.660  1.00  0.00           H  
ATOM    153  HA  LEU A   9      -2.695  83.720  66.802  1.00  0.00           H  
ATOM    154  HB3 LEU A   9      -4.400  81.776  67.077  1.00  0.00           H  
ATOM    155  HB2 LEU A   9      -5.570  82.995  67.494  1.00  0.00           H  
ATOM    156  HG  LEU A   9      -4.012  83.728  69.373  1.00  0.00           H  
ATOM    157 HD11 LEU A   9      -4.487  81.283  70.577  1.00  0.00           H  
ATOM    158 HD12 LEU A   9      -5.667  82.561  70.345  1.00  0.00           H  
ATOM    159 HD13 LEU A   9      -5.597  81.224  69.218  1.00  0.00           H  
ATOM    160 HD21 LEU A   9      -2.447  81.369  69.771  1.00  0.00           H  
ATOM    161 HD22 LEU A   9      -2.165  81.859  68.118  1.00  0.00           H  
ATOM    162 HD23 LEU A   9      -1.891  82.996  69.427  1.00  0.00           H  
ATOM    163  N   SER A  10      -5.060  84.083  64.542  1.00 41.10           N  
ANISOU  163  N   SER A  10     5503   4838   5276    -57   -450    975
ATOM    164  CA  SER A  10      -5.347  83.963  63.110  1.00 44.90           C  
ANISOU  164  CA  SER A  10     6017   5355   5687    -13   -494    996
ATOM    165  C   SER A  10      -4.320  84.703  62.227  1.00 47.33           C  
ANISOU  165  C   SER A  10     6421   5612   5951     14   -418   1045
ATOM    166  O   SER A  10      -3.994  84.203  61.151  1.00 47.80           O  
ANISOU  166  O   SER A  10     6541   5680   5939     35   -413   1053
ATOM    167  CB  SER A  10      -6.791  84.435  62.845  1.00 44.63           C  
ANISOU  167  CB  SER A  10     5956   5347   5654     63   -557   1012
ATOM    168  OG  SER A  10      -7.178  84.228  61.501  1.00 50.51           O  
ANISOU  168  OG  SER A  10     6765   6120   6305    145   -629   1016
ATOM    169  H   SER A  10      -5.696  84.655  65.082  1.00  0.00           H  
ATOM    170  HA  SER A  10      -5.288  82.904  62.851  1.00  0.00           H  
ATOM    171  HB3 SER A  10      -6.897  85.494  63.078  1.00  0.00           H  
ATOM    172  HB2 SER A  10      -7.490  83.896  63.485  1.00  0.00           H  
ATOM    173  HG  SER A  10      -6.682  84.832  60.943  1.00  0.00           H  
ATOM    174  N   SER A  11      -3.822  85.856  62.708  1.00 46.32           N  
ANISOU  174  N   SER A  11     6307   5413   5877     24   -344   1080
ATOM    175  CA  SER A  11      -2.793  86.664  62.052  1.00 47.49           C  
ANISOU  175  CA  SER A  11     6522   5471   6050     44   -226   1133
ATOM    176  C   SER A  11      -1.398  86.010  62.112  1.00 45.47           C  
ANISOU  176  C   SER A  11     6253   5168   5857    -24   -169   1104
ATOM    177  O   SER A  11      -0.667  86.077  61.125  1.00 45.44           O  
ANISOU  177  O   SER A  11     6316   5111   5838      8    -67   1157
ATOM    178  CB  SER A  11      -2.798  88.077  62.677  1.00 48.50           C  
ANISOU  178  CB  SER A  11     6632   5511   6286     47   -166   1149
ATOM    179  OG  SER A  11      -1.878  88.947  62.047  1.00 48.83           O  
ANISOU  179  OG  SER A  11     6718   5434   6400     67    -22   1206
ATOM    180  H   SER A  11      -4.154  86.206  63.597  1.00  0.00           H  
ATOM    181  HA  SER A  11      -3.067  86.762  60.999  1.00  0.00           H  
ATOM    182  HB3 SER A  11      -2.561  88.033  63.741  1.00  0.00           H  
ATOM    183  HB2 SER A  11      -3.791  88.521  62.594  1.00  0.00           H  
ATOM    184  HG  SER A  11      -0.986  88.637  62.226  1.00  0.00           H  
ATOM    185  N   GLU A  12      -1.065  85.395  63.260  1.00 45.76           N  
ANISOU  185  N   GLU A  12     6213   5212   5960   -100   -226   1024
ATOM    186  CA  GLU A  12       0.228  84.756  63.516  1.00 46.69           C  
ANISOU  186  CA  GLU A  12     6300   5283   6159   -163   -199    975
ATOM    187  C   GLU A  12       0.317  83.303  63.016  1.00 45.16           C  
ANISOU  187  C   GLU A  12     6122   5165   5871   -185   -232    961
ATOM    188  O   GLU A  12       1.437  82.816  62.851  1.00 46.00           O  
ANISOU  188  O   GLU A  12     6212   5231   6036   -226   -193    936
ATOM    189  CB  GLU A  12       0.531  84.809  65.031  1.00 46.19           C  
ANISOU  189  CB  GLU A  12     6175   5184   6193   -197   -269    880
ATOM    190  CG  GLU A  12       0.693  86.225  65.628  1.00 50.18           C  
ANISOU  190  CG  GLU A  12     6657   5584   6824   -176   -254    862
ATOM    191  CD  GLU A  12       1.863  87.042  65.079  1.00 55.51           C  
ANISOU  191  CD  GLU A  12     7287   6112   7692   -200   -150    865
ATOM    192  OE1 GLU A  12       2.855  86.430  64.628  1.00 56.20           O  
ANISOU  192  OE1 GLU A  12     7342   6163   7847   -240   -106    848
ATOM    193  OE2 GLU A  12       1.747  88.285  65.151  1.00 56.09           O1-
ANISOU  193  OE2 GLU A  12     7348   6090   7873   -178    -94    885
ATOM    194  H   GLU A  12      -1.715  85.402  64.034  1.00  0.00           H  
ATOM    195  HA  GLU A  12       1.005  85.310  62.985  1.00  0.00           H  
ATOM    196  HB3 GLU A  12       1.432  84.233  65.251  1.00  0.00           H  
ATOM    197  HB2 GLU A  12      -0.271  84.303  65.570  1.00  0.00           H  
ATOM    198  HG3 GLU A  12       0.823  86.141  66.707  1.00  0.00           H  
ATOM    199  HG2 GLU A  12      -0.213  86.806  65.473  1.00  0.00           H  
ATOM    200  N   ARG A  13      -0.828  82.625  62.805  1.00 45.27           N  
ANISOU  200  N   ARG A  13     6155   5277   5767   -156   -309    967
ATOM    201  CA  ARG A  13      -0.886  81.222  62.388  1.00 45.33           C  
ANISOU  201  CA  ARG A  13     6162   5349   5711   -183   -361    930
ATOM    202  C   ARG A  13      -0.349  81.020  60.966  1.00 45.52           C  
ANISOU  202  C   ARG A  13     6274   5360   5663   -145   -306    969
ATOM    203  O   ARG A  13      -0.921  81.534  60.004  1.00 44.85           O  
ANISOU  203  O   ARG A  13     6279   5269   5493    -51   -284   1026
ATOM    204  CB  ARG A  13      -2.307  80.644  62.583  1.00 46.83           C  
ANISOU  204  CB  ARG A  13     6317   5617   5857   -163   -464    905
ATOM    205  CG  ARG A  13      -2.550  79.247  61.968  1.00 48.74           C  
ANISOU  205  CG  ARG A  13     6538   5908   6075   -199   -521    852
ATOM    206  CD  ARG A  13      -3.741  78.483  62.568  1.00 52.15           C  
ANISOU  206  CD  ARG A  13     6873   6367   6573   -221   -577    809
ATOM    207  NE  ARG A  13      -4.990  79.260  62.569  1.00 58.96           N  
ANISOU  207  NE  ARG A  13     7698   7234   7469   -168   -616    827
ATOM    208  CZ  ARG A  13      -5.529  79.878  63.634  1.00 57.08           C  
ANISOU  208  CZ  ARG A  13     7412   6973   7305   -166   -575    844
ATOM    209  NH1 ARG A  13      -4.956  79.816  64.845  1.00 52.17           N  
ANISOU  209  NH1 ARG A  13     6791   6318   6714   -197   -501    842
ATOM    210  NH2 ARG A  13      -6.667  80.568  63.487  1.00 54.94           N1+
ANISOU  210  NH2 ARG A  13     7103   6704   7066   -111   -614    861
ATOM    211  H   ARG A  13      -1.715  83.079  62.974  1.00  0.00           H  
ATOM    212  HA  ARG A  13      -0.239  80.675  63.078  1.00  0.00           H  
ATOM    213  HB3 ARG A  13      -3.049  81.335  62.181  1.00  0.00           H  
ATOM    214  HB2 ARG A  13      -2.489  80.577  63.655  1.00  0.00           H  
ATOM    215  HG3 ARG A  13      -1.674  78.662  62.252  1.00  0.00           H  
ATOM    216  HG2 ARG A  13      -2.566  79.243  60.877  1.00  0.00           H  
ATOM    217  HD3 ARG A  13      -3.520  77.949  63.492  1.00  0.00           H  
ATOM    218  HD2 ARG A  13      -3.973  77.703  61.843  1.00  0.00           H  
ATOM    219  HE  ARG A  13      -5.442  79.364  61.672  1.00  0.00           H  
ATOM    220 HH12 ARG A  13      -5.380  80.270  65.640  1.00  0.00           H  
ATOM    221 HH11 ARG A  13      -4.095  79.305  64.967  1.00  0.00           H  
ATOM    222 HH22 ARG A  13      -7.089  81.030  64.279  1.00  0.00           H  
ATOM    223 HH21 ARG A  13      -7.113  80.631  62.583  1.00  0.00           H  
ATOM    224  N   GLU A  14       0.725  80.222  60.895  1.00 46.74           N  
ANISOU  224  N   GLU A  14     6419   5501   5840   -197   -276    941
ATOM    225  CA  GLU A  14       1.323  79.702  59.676  1.00 48.98           C  
ANISOU  225  CA  GLU A  14     6798   5769   6043   -152   -212    979
ATOM    226  C   GLU A  14       0.374  78.720  58.976  1.00 47.67           C  
ANISOU  226  C   GLU A  14     6682   5695   5735   -102   -339    945
ATOM    227  O   GLU A  14      -0.175  77.831  59.629  1.00 46.24           O  
ANISOU  227  O   GLU A  14     6419   5572   5579   -163   -439    874
ATOM    228  CB  GLU A  14       2.642  79.008  60.053  1.00 50.52           C  
ANISOU  228  CB  GLU A  14     6949   5916   6329   -226   -145    951
ATOM    229  CG  GLU A  14       3.748  79.999  60.460  1.00 56.14           C  
ANISOU  229  CG  GLU A  14     7602   6499   7229   -256    -22    969
ATOM    230  CD  GLU A  14       5.018  79.275  60.892  1.00 62.97           C  
ANISOU  230  CD  GLU A  14     8393   7309   8224   -325     12    916
ATOM    231  OE1 GLU A  14       5.023  78.767  62.035  1.00 63.91           O  
ANISOU  231  OE1 GLU A  14     8455   7484   8345   -377   -103    831
ATOM    232  OE2 GLU A  14       5.958  79.209  60.072  1.00 67.51           O1-
ANISOU  232  OE2 GLU A  14     8969   7770   8912   -316    167    963
ATOM    233  H   GLU A  14       1.129  79.875  61.752  1.00  0.00           H  
ATOM    234  HA  GLU A  14       1.534  80.536  59.003  1.00  0.00           H  
ATOM    235  HB3 GLU A  14       2.982  78.397  59.222  1.00  0.00           H  
ATOM    236  HB2 GLU A  14       2.465  78.307  60.871  1.00  0.00           H  
ATOM    237  HG3 GLU A  14       3.415  80.630  61.285  1.00  0.00           H  
ATOM    238  HG2 GLU A  14       3.978  80.668  59.629  1.00  0.00           H  
ATOM    239  N   ARG A  15       0.219  78.906  57.659  1.00 47.44           N  
ANISOU  239  N   ARG A  15     6793   5663   5569     26   -334    990
ATOM    240  CA  ARG A  15      -0.596  78.057  56.797  1.00 48.30           C  
ANISOU  240  CA  ARG A  15     6967   5839   5544    110   -489    933
ATOM    241  C   ARG A  15       0.321  77.271  55.854  1.00 49.17           C  
ANISOU  241  C   ARG A  15     7216   5926   5541    171   -428    952
ATOM    242  O   ARG A  15       1.340  77.797  55.402  1.00 48.98           O  
ANISOU  242  O   ARG A  15     7308   5821   5482    236   -247   1048
ATOM    243  CB  ARG A  15      -1.578  78.917  55.986  1.00 49.46           C  
ANISOU  243  CB  ARG A  15     7211   5998   5585    262   -568    952
ATOM    244  CG  ARG A  15      -2.448  79.875  56.817  1.00 52.89           C  
ANISOU  244  CG  ARG A  15     7527   6447   6123    226   -615    947
ATOM    245  CD  ARG A  15      -3.488  80.592  55.946  1.00 57.65           C  
ANISOU  245  CD  ARG A  15     8256   7044   6602    403   -665    982
ATOM    246  NE  ARG A  15      -4.148  81.683  56.675  1.00 63.97           N  
ANISOU  246  NE  ARG A  15     8955   7858   7494    387   -709    982
ATOM    247  CZ  ARG A  15      -5.026  82.548  56.138  1.00 66.17           C  
ANISOU  247  CZ  ARG A  15     9322   8131   7688    533   -754   1013
ATOM    248  NH1 ARG A  15      -5.347  82.491  54.837  1.00 68.02           N  
ANISOU  248  NH1 ARG A  15     9774   8346   7725    729   -763   1047
ATOM    249  NH2 ARG A  15      -5.582  83.485  56.916  1.00 66.48           N1+
ANISOU  249  NH2 ARG A  15     9252   8179   7829    505   -785   1012
ATOM    250  H   ARG A  15       0.714  79.655  57.196  1.00  0.00           H  
ATOM    251  HA  ARG A  15      -1.175  77.345  57.389  1.00  0.00           H  
ATOM    252  HB3 ARG A  15      -2.231  78.252  55.426  1.00  0.00           H  
ATOM    253  HB2 ARG A  15      -1.026  79.496  55.249  1.00  0.00           H  
ATOM    254  HG3 ARG A  15      -1.862  80.590  57.396  1.00  0.00           H  
ATOM    255  HG2 ARG A  15      -2.982  79.255  57.538  1.00  0.00           H  
ATOM    256  HD3 ARG A  15      -4.295  79.893  55.727  1.00  0.00           H  
ATOM    257  HD2 ARG A  15      -3.072  80.902  54.987  1.00  0.00           H  
ATOM    258  HE  ARG A  15      -3.913  81.768  57.653  1.00  0.00           H  
ATOM    259 HH12 ARG A  15      -5.997  83.148  54.432  1.00  0.00           H  
ATOM    260 HH11 ARG A  15      -4.913  81.794  54.248  1.00  0.00           H  
ATOM    261 HH22 ARG A  15      -6.238  84.148  56.529  1.00  0.00           H  
ATOM    262 HH21 ARG A  15      -5.336  83.546  57.894  1.00  0.00           H  
ATOM    263  N   VAL A  16      -0.078  76.023  55.566  1.00 47.64           N  
ANISOU  263  N   VAL A  16     7009   5786   5304    159   -563    863
ATOM    264  CA  VAL A  16       0.669  75.096  54.719  1.00 46.96           C  
ANISOU  264  CA  VAL A  16     7054   5683   5106    215   -519    867
ATOM    265  C   VAL A  16       0.743  75.535  53.238  1.00 48.33           C  
ANISOU  265  C   VAL A  16     7479   5816   5066    438   -483    930
ATOM    266  O   VAL A  16       1.803  75.384  52.632  1.00 48.62           O  
ANISOU  266  O   VAL A  16     7656   5782   5037    502   -297   1018
ATOM    267  CB  VAL A  16       0.093  73.657  54.839  1.00 47.33           C  
ANISOU  267  CB  VAL A  16     7030   5791   5164    160   -692    742
ATOM    268  CG1 VAL A  16      -1.347  73.500  54.314  1.00 47.06           C  
ANISOU  268  CG1 VAL A  16     7007   5797   5077    265   -933    638
ATOM    269  CG2 VAL A  16       1.008  72.600  54.204  1.00 41.19           C  
ANISOU  269  CG2 VAL A  16     6370   4989   4290    190   -621    752
ATOM    270  H   VAL A  16      -0.945  75.674  55.947  1.00  0.00           H  
ATOM    271  HA  VAL A  16       1.692  75.076  55.101  1.00  0.00           H  
ATOM    272  HB  VAL A  16       0.059  73.427  55.905  1.00  0.00           H  
ATOM    273 HG11 VAL A  16      -1.723  72.502  54.523  1.00  0.00           H  
ATOM    274 HG12 VAL A  16      -2.028  74.205  54.789  1.00  0.00           H  
ATOM    275 HG13 VAL A  16      -1.412  73.644  53.236  1.00  0.00           H  
ATOM    276 HG21 VAL A  16       0.668  71.592  54.440  1.00  0.00           H  
ATOM    277 HG22 VAL A  16       1.041  72.689  53.119  1.00  0.00           H  
ATOM    278 HG23 VAL A  16       2.026  72.703  54.580  1.00  0.00           H  
ATOM    279  N   GLU A  17      -0.350  76.111  52.707  1.00 51.52           N  
ANISOU  279  N   GLU A  17     7951   6253   5373    574   -646    890
ATOM    280  CA  GLU A  17      -0.456  76.608  51.334  1.00 56.10           C  
ANISOU  280  CA  GLU A  17     8813   6792   5710    838   -633    945
ATOM    281  C   GLU A  17       0.340  77.903  51.081  1.00 56.68           C  
ANISOU  281  C   GLU A  17     9017   6761   5757    915   -341   1120
ATOM    282  O   GLU A  17       0.747  78.125  49.940  1.00 56.46           O  
ANISOU  282  O   GLU A  17     9265   6668   5520   1143   -237   1201
ATOM    283  CB  GLU A  17      -1.942  76.717  50.903  1.00 58.52           C  
ANISOU  283  CB  GLU A  17     9149   7153   5933    982   -914    839
ATOM    284  CG  GLU A  17      -2.827  77.822  51.539  1.00 61.37           C  
ANISOU  284  CG  GLU A  17     9370   7529   6419    931   -936    857
ATOM    285  CD  GLU A  17      -3.342  77.567  52.961  1.00 61.97           C  
ANISOU  285  CD  GLU A  17     9139   7662   6745    710  -1057    759
ATOM    286  OE1 GLU A  17      -3.001  76.517  53.551  1.00 54.78           O  
ANISOU  286  OE1 GLU A  17     8103   6762   5947    545  -1017    728
ATOM    287  OE2 GLU A  17      -4.092  78.443  53.444  1.00 66.51           O1-
ANISOU  287  OE2 GLU A  17     9608   8260   7403    716  -1171    720
ATOM    288  H   GLU A  17      -1.196  76.197  53.261  1.00  0.00           H  
ATOM    289  HA  GLU A  17      -0.006  75.851  50.690  1.00  0.00           H  
ATOM    290  HB3 GLU A  17      -2.421  75.748  51.046  1.00  0.00           H  
ATOM    291  HB2 GLU A  17      -1.960  76.867  49.822  1.00  0.00           H  
ATOM    292  HG3 GLU A  17      -3.711  77.947  50.914  1.00  0.00           H  
ATOM    293  HG2 GLU A  17      -2.316  78.785  51.519  1.00  0.00           H  
ATOM    294  N   ASP A  18       0.578  78.709  52.131  1.00 56.09           N  
ANISOU  294  N   ASP A  18     8758   6656   5897    744   -207   1172
ATOM    295  CA  ASP A  18       1.408  79.918  52.071  1.00 58.01           C  
ANISOU  295  CA  ASP A  18     9069   6771   6202    779     86   1324
ATOM    296  C   ASP A  18       2.912  79.597  52.059  1.00 57.83           C  
ANISOU  296  C   ASP A  18     9037   6646   6292    708    334   1395
ATOM    297  O   ASP A  18       3.647  80.254  51.324  1.00 61.59           O  
ANISOU  297  O   ASP A  18     9660   6984   6757    823    604   1529
ATOM    298  CB  ASP A  18       1.101  80.950  53.186  1.00 56.19           C  
ANISOU  298  CB  ASP A  18     8634   6532   6183    632    105   1328
ATOM    299  CG  ASP A  18      -0.360  81.403  53.299  1.00 57.65           C  
ANISOU  299  CG  ASP A  18     8832   6785   6287    717    -74   1293
ATOM    300  OD1 ASP A  18      -1.125  81.209  52.329  1.00 58.53           O  
ANISOU  300  OD1 ASP A  18     9151   6908   6178    936   -151   1304
ATOM    301  OD2 ASP A  18      -0.674  82.000  54.351  1.00 64.34           O1-
ANISOU  301  OD2 ASP A  18     9488   7666   7294    579   -138   1253
ATOM    302  H   ASP A  18       0.199  78.470  53.036  1.00  0.00           H  
ATOM    303  HA  ASP A  18       1.191  80.414  51.122  1.00  0.00           H  
ATOM    304  HB3 ASP A  18       1.714  81.840  53.036  1.00  0.00           H  
ATOM    305  HB2 ASP A  18       1.384  80.511  54.145  1.00  0.00           H  
ATOM    306  N   LEU A  19       3.339  78.609  52.866  1.00 56.27           N  
ANISOU  306  N   LEU A  19     8659   6498   6222    525    260   1307
ATOM    307  CA  LEU A  19       4.751  78.255  53.033  1.00 56.45           C  
ANISOU  307  CA  LEU A  19     8625   6426   6399    437    465   1351
ATOM    308  C   LEU A  19       5.278  77.253  51.996  1.00 56.20           C  
ANISOU  308  C   LEU A  19     8773   6378   6204    547    527   1374
ATOM    309  O   LEU A  19       6.486  77.258  51.764  1.00 58.81           O  
ANISOU  309  O   LEU A  19     9126   6582   6635    550    778   1460
ATOM    310  CB  LEU A  19       4.989  77.681  54.448  1.00 54.18           C  
ANISOU  310  CB  LEU A  19     8070   6188   6327    207    362   1246
ATOM    311  CG  LEU A  19       4.861  78.689  55.607  1.00 55.81           C  
ANISOU  311  CG  LEU A  19     8098   6368   6738     95    354   1228
ATOM    312  CD1 LEU A  19       5.184  77.996  56.943  1.00 54.80           C  
ANISOU  312  CD1 LEU A  19     7768   6272   6781    -77    262   1125
ATOM    313  CD2 LEU A  19       5.733  79.942  55.418  1.00 58.72           C  
ANISOU  313  CD2 LEU A  19     8478   6566   7266    133    612   1337
ATOM    314  H   LEU A  19       2.677  78.115  53.448  1.00  0.00           H  
ATOM    315  HA  LEU A  19       5.356  79.155  52.912  1.00  0.00           H  
ATOM    316  HB3 LEU A  19       5.993  77.254  54.496  1.00  0.00           H  
ATOM    317  HB2 LEU A  19       4.304  76.848  54.618  1.00  0.00           H  
ATOM    318  HG  LEU A  19       3.821  79.016  55.652  1.00  0.00           H  
ATOM    319 HD11 LEU A  19       4.446  78.260  57.692  1.00  0.00           H  
ATOM    320 HD12 LEU A  19       5.188  76.910  56.854  1.00  0.00           H  
ATOM    321 HD13 LEU A  19       6.159  78.285  57.336  1.00  0.00           H  
ATOM    322 HD21 LEU A  19       6.095  80.344  56.365  1.00  0.00           H  
ATOM    323 HD22 LEU A  19       6.608  79.731  54.802  1.00  0.00           H  
ATOM    324 HD23 LEU A  19       5.169  80.738  54.931  1.00  0.00           H  
ATOM    325  N   PHE A  20       4.408  76.397  51.432  1.00 54.55           N  
ANISOU  325  N   PHE A  20     8681   6277   5768    643    302   1291
ATOM    326  CA  PHE A  20       4.815  75.286  50.569  1.00 53.84           C  
ANISOU  326  CA  PHE A  20     8750   6185   5521    736    311   1280
ATOM    327  C   PHE A  20       4.013  75.241  49.268  1.00 57.35           C  
ANISOU  327  C   PHE A  20     9500   6646   5643   1016    202   1275
ATOM    328  O   PHE A  20       2.806  75.487  49.273  1.00 57.97           O  
ANISOU  328  O   PHE A  20     9588   6807   5632   1080    -45   1187
ATOM    329  CB  PHE A  20       4.688  73.942  51.321  1.00 51.48           C  
ANISOU  329  CB  PHE A  20     8267   5991   5302    557    111   1139
ATOM    330  CG  PHE A  20       5.708  73.741  52.425  1.00 44.73           C  
ANISOU  330  CG  PHE A  20     7176   5106   4713    339    223   1141
ATOM    331  CD1 PHE A  20       7.020  73.339  52.102  1.00 46.80           C  
ANISOU  331  CD1 PHE A  20     7455   5276   5052    320    433   1203
ATOM    332  CD2 PHE A  20       5.414  74.129  53.749  1.00 44.88           C  
ANISOU  332  CD2 PHE A  20     6971   5174   4907    175    120   1078
ATOM    333  CE1 PHE A  20       7.993  73.287  53.090  1.00 43.58           C  
ANISOU  333  CE1 PHE A  20     6825   4831   4903    140    502   1181
ATOM    334  CE2 PHE A  20       6.404  74.071  54.722  1.00 41.97           C  
ANISOU  334  CE2 PHE A  20     6415   4770   4762     13    192   1062
ATOM    335  CZ  PHE A  20       7.686  73.652  54.394  1.00 45.45           C  
ANISOU  335  CZ  PHE A  20     6856   5122   5290     -5    367   1104
ATOM    336  H   PHE A  20       3.426  76.441  51.668  1.00  0.00           H  
ATOM    337  HA  PHE A  20       5.861  75.406  50.283  1.00  0.00           H  
ATOM    338  HB3 PHE A  20       4.807  73.118  50.616  1.00  0.00           H  
ATOM    339  HB2 PHE A  20       3.687  73.831  51.738  1.00  0.00           H  
ATOM    340  HD1 PHE A  20       7.275  73.079  51.086  1.00  0.00           H  
ATOM    341  HD2 PHE A  20       4.426  74.482  54.006  1.00  0.00           H  
ATOM    342  HE1 PHE A  20       8.996  72.977  52.841  1.00  0.00           H  
ATOM    343  HE2 PHE A  20       6.185  74.369  55.734  1.00  0.00           H  
ATOM    344  HZ  PHE A  20       8.452  73.616  55.155  1.00  0.00           H  
ATOM    345  N   GLU A  21       4.722  74.866  48.193  1.00 60.17           N  
ANISOU  345  N   GLU A  21    10113   6913   5836   1197    389   1366
ATOM    346  CA  GLU A  21       4.182  74.530  46.883  1.00 62.87           C  
ANISOU  346  CA  GLU A  21    10797   7260   5832   1503    276   1346
ATOM    347  C   GLU A  21       4.189  73.003  46.758  1.00 61.61           C  
ANISOU  347  C   GLU A  21    10612   7183   5612   1457     55   1198
ATOM    348  O   GLU A  21       5.258  72.401  46.854  1.00 61.67           O  
ANISOU  348  O   GLU A  21    10599   7147   5687   1378    222   1240
ATOM    349  CB  GLU A  21       5.057  75.201  45.795  1.00 65.49           C  
ANISOU  349  CB  GLU A  21    11449   7423   6011   1749    647   1543
ATOM    350  CG  GLU A  21       4.588  74.970  44.344  1.00 69.65           C  
ANISOU  350  CG  GLU A  21    12411   7930   6125   2137    565   1543
ATOM    351  CD  GLU A  21       3.154  75.449  44.111  1.00 74.73           C  
ANISOU  351  CD  GLU A  21    13166   8639   6588   2316    293   1465
ATOM    352  OE1 GLU A  21       2.933  76.672  44.252  1.00 78.79           O  
ANISOU  352  OE1 GLU A  21    13638   9109   7190   2308    427   1562
ATOM    353  OE2 GLU A  21       2.301  74.576  43.840  1.00 77.11           O1-
ANISOU  353  OE2 GLU A  21    13589   9029   6681   2468    -66   1295
ATOM    354  H   GLU A  21       5.716  74.700  48.299  1.00  0.00           H  
ATOM    355  HA  GLU A  21       3.155  74.892  46.806  1.00  0.00           H  
ATOM    356  HB3 GLU A  21       6.084  74.844  45.885  1.00  0.00           H  
ATOM    357  HB2 GLU A  21       5.117  76.273  45.981  1.00  0.00           H  
ATOM    358  HG3 GLU A  21       4.665  73.914  44.080  1.00  0.00           H  
ATOM    359  HG2 GLU A  21       5.243  75.504  43.656  1.00  0.00           H  
ATOM    360  N   TYR A  22       3.000  72.414  46.571  1.00 60.68           N  
ANISOU  360  N   TYR A  22    10474   7172   5408   1497   -316   1020
ATOM    361  CA  TYR A  22       2.787  70.965  46.596  1.00 58.34           C  
ANISOU  361  CA  TYR A  22    10136   6943   5086   1455   -558    855
ATOM    362  C   TYR A  22       1.635  70.509  45.680  1.00 61.19           C  
ANISOU  362  C   TYR A  22    10691   7343   5217   1704   -915    687
ATOM    363  O   TYR A  22       1.360  69.308  45.648  1.00 61.81           O  
ANISOU  363  O   TYR A  22    10763   7452   5271   1701  -1112    544
ATOM    364  CB  TYR A  22       2.584  70.506  48.064  1.00 55.66           C  
ANISOU  364  CB  TYR A  22     9406   6686   5056   1124   -674    754
ATOM    365  CG  TYR A  22       1.389  71.119  48.780  1.00 56.58           C  
ANISOU  365  CG  TYR A  22     9331   6862   5303   1049   -861    681
ATOM    366  CD1 TYR A  22       1.573  72.238  49.618  1.00 57.29           C  
ANISOU  366  CD1 TYR A  22     9306   6934   5528    950   -693    792
ATOM    367  CD2 TYR A  22       0.090  70.597  48.596  1.00 57.49           C  
ANISOU  367  CD2 TYR A  22     9373   7035   5435   1081  -1203    494
ATOM    368  CE1 TYR A  22       0.470  72.840  50.250  1.00 58.48           C  
ANISOU  368  CE1 TYR A  22     9292   7134   5794    890   -847    734
ATOM    369  CE2 TYR A  22      -1.016  71.216  49.208  1.00 62.34           C  
ANISOU  369  CE2 TYR A  22     9799   7688   6198   1017  -1352    433
ATOM    370  CZ  TYR A  22      -0.827  72.337  50.040  1.00 62.00           C  
ANISOU  370  CZ  TYR A  22     9665   7636   6254    924  -1164    562
ATOM    371  OH  TYR A  22      -1.896  72.936  50.640  1.00 69.05           O  
ANISOU  371  OH  TYR A  22    10386   8563   7287    869  -1291    513
ATOM    372  H   TYR A  22       2.170  72.986  46.499  1.00  0.00           H  
ATOM    373  HA  TYR A  22       3.678  70.471  46.205  1.00  0.00           H  
ATOM    374  HB3 TYR A  22       3.484  70.727  48.639  1.00  0.00           H  
ATOM    375  HB2 TYR A  22       2.486  69.424  48.104  1.00  0.00           H  
ATOM    376  HD1 TYR A  22       2.561  72.643  49.770  1.00  0.00           H  
ATOM    377  HD2 TYR A  22      -0.067  69.735  47.964  1.00  0.00           H  
ATOM    378  HE1 TYR A  22       0.624  73.694  50.890  1.00  0.00           H  
ATOM    379  HE2 TYR A  22      -2.008  70.826  49.036  1.00  0.00           H  
ATOM    380  HH  TYR A  22      -2.737  72.535  50.410  1.00  0.00           H  
ATOM    381  N   GLU A  23       0.966  71.441  44.976  1.00 62.92           N  
ANISOU  381  N   GLU A  23    11076   7551   5279   1927  -1013    690
ATOM    382  CA  GLU A  23      -0.197  71.152  44.134  1.00 65.53           C  
ANISOU  382  CA  GLU A  23    11577   7910   5411   2187  -1399    501
ATOM    383  C   GLU A  23       0.181  70.311  42.904  1.00 66.36           C  
ANISOU  383  C   GLU A  23    12049   7963   5203   2472  -1436    470
ATOM    384  O   GLU A  23       1.086  70.687  42.159  1.00 66.85           O  
ANISOU  384  O   GLU A  23    12433   7935   5032   2680  -1135    652
ATOM    385  CB  GLU A  23      -0.903  72.462  43.731  0.00 70.57           C  
ANISOU  385  CB  GLU A  23    12362   8536   5913   2408  -1470    528
ATOM    386  CG  GLU A  23      -1.488  73.232  44.935  0.00 68.82           C  
ANISOU  386  CG  GLU A  23    11791   8372   5984   2165  -1518    514
ATOM    387  CD  GLU A  23      -2.307  74.470  44.556  0.00 70.32           C  
ANISOU  387  CD  GLU A  23    12142   8547   6030   2397  -1581    547
ATOM    388  OE1 GLU A  23      -2.407  74.775  43.347  0.00 72.79           O  
ANISOU  388  OE1 GLU A  23    12855   8802   6001   2762  -1584    584
ATOM    389  OE2 GLU A  23      -2.837  75.095  45.501  0.00 68.98           O1-
ANISOU  389  OE2 GLU A  23    11717   8417   6075   2233  -1619    541
ATOM    390  H   GLU A  23       1.262  72.407  44.998  1.00  0.00           H  
ATOM    391  HA  GLU A  23      -0.900  70.573  44.738  1.00  0.00           H  
ATOM    392  HB3 GLU A  23      -1.703  72.233  43.025  1.00  0.00           H  
ATOM    393  HB2 GLU A  23      -0.202  73.106  43.196  1.00  0.00           H  
ATOM    394  HG3 GLU A  23      -0.687  73.550  45.602  1.00  0.00           H  
ATOM    395  HG2 GLU A  23      -2.133  72.571  45.517  1.00  0.00           H  
ATOM    396  N   GLY A  24      -0.513  69.171  42.742  1.00 66.17           N  
ANISOU  396  N   GLY A  24    11966   7979   5195   2481  -1787    239
ATOM    397  CA  GLY A  24      -0.285  68.198  41.671  1.00 68.19           C  
ANISOU  397  CA  GLY A  24    12547   8191   5171   2739  -1883    165
ATOM    398  C   GLY A  24       0.946  67.302  41.910  1.00 65.85           C  
ANISOU  398  C   GLY A  24    12207   7874   4939   2565  -1632    250
ATOM    399  O   GLY A  24       1.256  66.485  41.045  1.00 65.67           O  
ANISOU  399  O   GLY A  24    12471   7807   4676   2779  -1664    213
ATOM    400  H   GLY A  24      -1.239  68.947  43.407  1.00  0.00           H  
ATOM    401  HA3 GLY A  24      -0.177  68.712  40.715  1.00  0.00           H  
ATOM    402  HA2 GLY A  24      -1.167  67.562  41.589  1.00  0.00           H  
ATOM    403  N   CYS A  25       1.641  67.443  43.054  1.00 63.71           N  
ANISOU  403  N   CYS A  25    11593   7632   4981   2197  -1397    353
ATOM    404  CA  CYS A  25       2.892  66.749  43.377  1.00 61.96           C  
ANISOU  404  CA  CYS A  25    11309   7387   4847   2023  -1136    446
ATOM    405  C   CYS A  25       2.657  65.577  44.356  1.00 60.05           C  
ANISOU  405  C   CYS A  25    10706   7215   4896   1711  -1306    294
ATOM    406  O   CYS A  25       3.552  65.250  45.134  1.00 56.64           O  
ANISOU  406  O   CYS A  25    10090   6785   4646   1470  -1082    381
ATOM    407  CB  CYS A  25       3.947  67.736  43.922  1.00 62.50           C  
ANISOU  407  CB  CYS A  25    11302   7403   5040   1885   -701    692
ATOM    408  SG  CYS A  25       4.367  68.993  42.684  1.00 65.15           S  
ANISOU  408  SG  CYS A  25    12037   7618   5097   2229   -408    907
ATOM    409  H   CYS A  25       1.336  68.130  43.730  1.00  0.00           H  
ATOM    410  HA  CYS A  25       3.309  66.305  42.473  1.00  0.00           H  
ATOM    411  HB3 CYS A  25       4.872  67.221  44.182  1.00  0.00           H  
ATOM    412  HB2 CYS A  25       3.588  68.231  44.822  1.00  0.00           H  
ATOM    413  HG  CYS A  25       3.171  69.591  42.673  1.00  0.00           H  
ATOM    414  N   LYS A  26       1.452  64.983  44.369  1.00 60.37           N  
ANISOU  414  N   LYS A  26    10653   7295   4991   1736  -1697     63
ATOM    415  CA  LYS A  26       1.066  63.898  45.284  1.00 59.65           C  
ANISOU  415  CA  LYS A  26    10242   7239   5183   1478  -1859    -92
ATOM    416  C   LYS A  26       1.786  62.581  44.928  1.00 60.91           C  
ANISOU  416  C   LYS A  26    10512   7371   5259   1482  -1795   -108
ATOM    417  O   LYS A  26       1.608  62.107  43.810  1.00 61.59           O  
ANISOU  417  O   LYS A  26    10924   7415   5062   1761  -1886   -156
ATOM    418  CB  LYS A  26      -0.473  63.761  45.293  1.00 61.62           C  
ANISOU  418  CB  LYS A  26    10385   7496   5531   1549  -2289   -347
ATOM    419  CG  LYS A  26      -1.016  62.706  46.283  1.00 61.92           C  
ANISOU  419  CG  LYS A  26    10032   7546   5949   1264  -2421   -494
ATOM    420  CD  LYS A  26      -2.554  62.655  46.374  1.00 68.85           C  
ANISOU  420  CD  LYS A  26    10782   8398   6981   1350  -2836   -751
ATOM    421  CE  LYS A  26      -3.187  63.909  46.993  1.00 69.59           C  
ANISOU  421  CE  LYS A  26    10718   8517   7208   1314  -2862   -719
ATOM    422  NZ  LYS A  26      -4.630  63.740  47.226  1.00 70.58           N1+
ANISOU  422  NZ  LYS A  26    10841   8607   7370   1519  -3278   -955
ATOM    423  H   LYS A  26       0.785  65.247  43.661  1.00  0.00           H  
ATOM    424  HA  LYS A  26       1.354  64.183  46.290  1.00  0.00           H  
ATOM    425  HB3 LYS A  26      -0.828  63.533  44.287  1.00  0.00           H  
ATOM    426  HB2 LYS A  26      -0.889  64.735  45.550  1.00  0.00           H  
ATOM    427  HG3 LYS A  26      -0.599  62.885  47.276  1.00  0.00           H  
ATOM    428  HG2 LYS A  26      -0.662  61.716  45.990  1.00  0.00           H  
ATOM    429  HD3 LYS A  26      -2.838  61.795  46.976  1.00  0.00           H  
ATOM    430  HD2 LYS A  26      -2.973  62.483  45.381  1.00  0.00           H  
ATOM    431  HE3 LYS A  26      -3.040  64.782  46.357  1.00  0.00           H  
ATOM    432  HE2 LYS A  26      -2.716  64.119  47.950  1.00  0.00           H  
ATOM    433  HZ1 LYS A  26      -5.103  63.569  46.352  1.00  0.00           H  
ATOM    434  HZ2 LYS A  26      -4.787  62.966  47.857  1.00  0.00           H  
ATOM    435  HZ3 LYS A  26      -4.989  64.586  47.644  1.00  0.00           H  
ATOM    436  N   VAL A  27       2.561  62.011  45.859  1.00 59.52           N  
ANISOU  436  N   VAL A  27    10086   7215   5315   1195  -1635    -65
ATOM    437  CA  VAL A  27       3.418  60.843  45.609  1.00 60.14           C  
ANISOU  437  CA  VAL A  27    10225   7271   5354   1159  -1552    -71
ATOM    438  C   VAL A  27       3.072  59.617  46.473  1.00 62.06           C  
ANISOU  438  C   VAL A  27    10186   7529   5865    937  -1712   -233
ATOM    439  O   VAL A  27       3.491  58.518  46.121  1.00 64.08           O  
ANISOU  439  O   VAL A  27    10512   7760   6074    947  -1724   -287
ATOM    440  CB  VAL A  27       4.913  61.171  45.873  1.00 57.89           C  
ANISOU  440  CB  VAL A  27     9956   6968   5071   1057  -1145    158
ATOM    441  CG1 VAL A  27       5.476  62.153  44.833  1.00 54.69           C  
ANISOU  441  CG1 VAL A  27     9878   6503   4401   1313   -938    321
ATOM    442  CG2 VAL A  27       5.215  61.651  47.307  1.00 50.22           C  
ANISOU  442  CG2 VAL A  27     8661   6037   4384    779  -1007    237
ATOM    443  H   VAL A  27       2.612  62.408  46.791  1.00  0.00           H  
ATOM    444  HA  VAL A  27       3.326  60.508  44.576  1.00  0.00           H  
ATOM    445  HB  VAL A  27       5.480  60.247  45.733  1.00  0.00           H  
ATOM    446 HG11 VAL A  27       6.538  62.337  44.995  1.00  0.00           H  
ATOM    447 HG12 VAL A  27       5.367  61.757  43.823  1.00  0.00           H  
ATOM    448 HG13 VAL A  27       4.969  63.114  44.871  1.00  0.00           H  
ATOM    449 HG21 VAL A  27       6.288  61.724  47.443  1.00  0.00           H  
ATOM    450 HG22 VAL A  27       4.781  62.631  47.508  1.00  0.00           H  
ATOM    451 HG23 VAL A  27       4.860  60.961  48.072  1.00  0.00           H  
ATOM    452  N   GLY A  28       2.354  59.795  47.586  1.00 65.16           N  
ANISOU  452  N   GLY A  28    10270   7948   6539    747  -1802   -296
ATOM    453  CA  GLY A  28       2.002  58.695  48.478  1.00 67.80           C  
ANISOU  453  CA  GLY A  28    10332   8267   7164    556  -1934   -446
ATOM    454  C   GLY A  28       0.537  58.875  48.855  1.00 72.51           C  
ANISOU  454  C   GLY A  28    10740   8845   7964    556  -2207   -609
ATOM    455  O   GLY A  28       0.068  60.003  49.016  1.00 73.95           O  
ANISOU  455  O   GLY A  28    10907   9055   8136    594  -2204   -551
ATOM    456  H   GLY A  28       2.027  60.720  47.847  1.00  0.00           H  
ATOM    457  HA3 GLY A  28       2.619  58.729  49.375  1.00  0.00           H  
ATOM    458  HA2 GLY A  28       2.149  57.714  48.026  1.00  0.00           H  
ATOM    459  N   ARG A  29      -0.185  57.765  49.017  1.00 77.57           N  
ANISOU  459  N   ARG A  29    11226   9426   8820    515  -2435   -817
ATOM    460  CA  ARG A  29      -1.548  57.715  49.526  1.00 81.45           C  
ANISOU  460  CA  ARG A  29    11517   9867   9562    532  -2726  -1010
ATOM    461  C   ARG A  29      -1.662  56.434  50.352  1.00 83.86           C  
ANISOU  461  C   ARG A  29    11479  10089  10293    317  -2761  -1136
ATOM    462  O   ARG A  29      -1.406  55.355  49.819  1.00 86.52           O  
ANISOU  462  O   ARG A  29    11682  10337  10856    366  -3058  -1371
ATOM    463  CB  ARG A  29      -2.589  57.729  48.381  0.00 88.05           C  
ANISOU  463  CB  ARG A  29    12585  10661  10208    835  -3101  -1224
ATOM    464  CG  ARG A  29      -2.520  58.965  47.465  0.00 88.73           C  
ANISOU  464  CG  ARG A  29    13081  10798   9834   1110  -3055  -1105
ATOM    465  CD  ARG A  29      -3.712  59.101  46.503  0.00 92.10           C  
ANISOU  465  CD  ARG A  29    13743  11177  10075   1444  -3456  -1331
ATOM    466  NE  ARG A  29      -4.944  59.514  47.192  0.00 93.60           N  
ANISOU  466  NE  ARG A  29    13714  11331  10518   1472  -3773  -1525
ATOM    467  CZ  ARG A  29      -6.162  59.618  46.638  0.00 96.79           C  
ANISOU  467  CZ  ARG A  29    14250  11681  10843   1757  -4194  -1772
ATOM    468  NH1 ARG A  29      -6.362  59.350  45.343  0.00 98.84           N  
ANISOU  468  NH1 ARG A  29    14892  11919  10743   2055  -4344  -1849
ATOM    469  NH2 ARG A  29      -7.188  60.004  47.398  0.00 98.15           N1+
ANISOU  469  NH2 ARG A  29    14178  11813  11300   1761  -4472  -1948
ATOM    470  H   ARG A  29       0.239  56.853  48.904  1.00  0.00           H  
ATOM    471  HA  ARG A  29      -1.731  58.564  50.185  1.00  0.00           H  
ATOM    472  HB3 ARG A  29      -3.583  57.666  48.826  1.00  0.00           H  
ATOM    473  HB2 ARG A  29      -2.478  56.831  47.770  1.00  0.00           H  
ATOM    474  HG3 ARG A  29      -1.580  59.036  46.919  1.00  0.00           H  
ATOM    475  HG2 ARG A  29      -2.536  59.827  48.131  1.00  0.00           H  
ATOM    476  HD3 ARG A  29      -3.944  58.108  46.118  1.00  0.00           H  
ATOM    477  HD2 ARG A  29      -3.473  59.719  45.637  1.00  0.00           H  
ATOM    478  HE  ARG A  29      -4.860  59.750  48.174  1.00  0.00           H  
ATOM    479 HH12 ARG A  29      -7.280  59.433  44.930  1.00  0.00           H  
ATOM    480 HH11 ARG A  29      -5.599  59.056  44.754  1.00  0.00           H  
ATOM    481 HH22 ARG A  29      -8.121  60.088  47.021  1.00  0.00           H  
ATOM    482 HH21 ARG A  29      -7.041  60.222  48.379  1.00  0.00           H  
ATOM    483  N   GLY A  30      -2.040  56.578  51.619  1.00 83.48           N  
ANISOU  483  N   GLY A  30    11293  10056  10370     95  -2455   -983
ATOM    484  CA  GLY A  30      -2.431  55.489  52.499  1.00 85.24           C  
ANISOU  484  CA  GLY A  30    11223  10185  10980   -100  -2405  -1058
ATOM    485  C   GLY A  30      -3.810  55.859  53.055  1.00 87.15           C  
ANISOU  485  C   GLY A  30    11165  10358  11592   -192  -2447  -1117
ATOM    486  O   GLY A  30      -4.303  56.970  52.851  1.00 88.31           O  
ANISOU  486  O   GLY A  30    11315  10536  11703   -103  -2562  -1125
ATOM    487  H   GLY A  30      -2.240  57.510  51.987  1.00  0.00           H  
ATOM    488  HA3 GLY A  30      -1.711  55.401  53.311  1.00  0.00           H  
ATOM    489  HA2 GLY A  30      -2.482  54.528  51.984  1.00  0.00           H  
ATOM    490  N   THR A  31      -4.429  54.948  53.807  1.00 87.77           N  
ANISOU  490  N   THR A  31    10987  10326  12033   -361  -2332  -1152
ATOM    491  CA  THR A  31      -5.707  55.162  54.493  1.00 88.71           C  
ANISOU  491  CA  THR A  31    10802  10347  12557   -462  -2295  -1184
ATOM    492  C   THR A  31      -5.620  56.256  55.585  1.00 86.81           C  
ANISOU  492  C   THR A  31    10555  10180  12250   -545  -1999   -951
ATOM    493  O   THR A  31      -6.615  56.916  55.878  1.00 88.36           O  
ANISOU  493  O   THR A  31    10607  10352  12613   -550  -2014   -948
ATOM    494  CB  THR A  31      -6.116  53.831  55.174  0.00 93.80           C  
ANISOU  494  CB  THR A  31    11185  10815  13641   -601  -2218  -1284
ATOM    495  OG1 THR A  31      -5.009  53.291  55.887  0.00 91.91           O  
ANISOU  495  OG1 THR A  31    11034  10600  13287   -701  -1918  -1125
ATOM    496  CG2 THR A  31      -6.542  52.762  54.158  0.00 96.46           C  
ANISOU  496  CG2 THR A  31    11474  11047  14128   -518  -2561  -1561
ATOM    497  H   THR A  31      -4.001  54.061  54.035  1.00  0.00           H  
ATOM    498  HA  THR A  31      -6.463  55.461  53.764  1.00  0.00           H  
ATOM    499  HB  THR A  31      -6.937  54.002  55.874  1.00  0.00           H  
ATOM    500  HG1 THR A  31      -5.294  52.475  56.314  1.00  0.00           H  
ATOM    501 HG21 THR A  31      -6.848  51.840  54.655  1.00  0.00           H  
ATOM    502 HG22 THR A  31      -7.391  53.107  53.567  1.00  0.00           H  
ATOM    503 HG23 THR A  31      -5.739  52.514  53.463  1.00  0.00           H  
ATOM    504  N   TYR A  32      -4.418  56.439  56.135  1.00 83.50           N  
ANISOU  504  N   TYR A  32    10288   9841  11597   -599  -1746   -770
ATOM    505  CA  TYR A  32      -4.061  57.445  57.123  1.00 80.76           C  
ANISOU  505  CA  TYR A  32     9965   9562  11158   -657  -1487   -565
ATOM    506  C   TYR A  32      -3.869  58.848  56.524  1.00 78.65           C  
ANISOU  506  C   TYR A  32     9824   9404  10654   -560  -1556   -494
ATOM    507  O   TYR A  32      -4.054  59.818  57.258  1.00 77.43           O  
ANISOU  507  O   TYR A  32     9606   9266  10549   -595  -1431   -392
ATOM    508  CB  TYR A  32      -2.792  56.975  57.872  1.00 79.48           C  
ANISOU  508  CB  TYR A  32     9944   9454  10803   -709  -1260   -427
ATOM    509  CG  TYR A  32      -1.708  56.349  57.000  0.00 83.46           C  
ANISOU  509  CG  TYR A  32    10340   9847  11523   -804  -1125   -453
ATOM    510  CD1 TYR A  32      -0.674  57.141  56.457  0.00 83.39           C  
ANISOU  510  CD1 TYR A  32    10189   9750  11747   -884   -896   -377
ATOM    511  CD2 TYR A  32      -1.747  54.966  56.718  0.00 84.10           C  
ANISOU  511  CD2 TYR A  32    10482   9903  11569   -795  -1208   -547
ATOM    512  CE1 TYR A  32       0.311  56.554  55.637  0.00 83.86           C  
ANISOU  512  CE1 TYR A  32    10170   9690  12004   -952   -738   -386
ATOM    513  CE2 TYR A  32      -0.773  54.384  55.888  0.00 84.45           C  
ANISOU  513  CE2 TYR A  32    10432   9837  11820   -878  -1072   -568
ATOM    514  CZ  TYR A  32       0.259  55.175  55.350  0.00 84.37           C  
ANISOU  514  CZ  TYR A  32    10281   9732  12045   -956   -829   -483
ATOM    515  OH  TYR A  32       1.194  54.591  54.550  0.00 84.93           O  
ANISOU  515  OH  TYR A  32    10275   9674  12321  -1022   -659   -489
ATOM    516  H   TYR A  32      -3.672  55.821  55.851  1.00  0.00           H  
ATOM    517  HA  TYR A  32      -4.875  57.515  57.846  1.00  0.00           H  
ATOM    518  HB3 TYR A  32      -3.086  56.222  58.605  1.00  0.00           H  
ATOM    519  HB2 TYR A  32      -2.369  57.791  58.463  1.00  0.00           H  
ATOM    520  HD1 TYR A  32      -0.634  58.201  56.665  1.00  0.00           H  
ATOM    521  HD2 TYR A  32      -2.529  54.342  57.130  1.00  0.00           H  
ATOM    522  HE1 TYR A  32       1.103  57.165  55.228  1.00  0.00           H  
ATOM    523  HE2 TYR A  32      -0.810  53.326  55.673  1.00  0.00           H  
ATOM    524  HH  TYR A  32       2.054  55.043  54.556  1.00  0.00           H  
ATOM    525  N   GLY A  33      -3.506  58.972  55.239  1.00 77.36           N  
ANISOU  525  N   GLY A  33     9857   9305  10231   -424  -1736   -542
ATOM    526  CA  GLY A  33      -3.160  60.283  54.709  1.00 75.62           C  
ANISOU  526  CA  GLY A  33     9778   9168   9786   -305  -1794   -477
ATOM    527  C   GLY A  33      -2.518  60.207  53.324  1.00 73.94           C  
ANISOU  527  C   GLY A  33     9848   9012   9231   -144  -1881   -474
ATOM    528  O   GLY A  33      -2.236  59.131  52.794  1.00 76.25           O  
ANISOU  528  O   GLY A  33    10253   9312   9406   -155  -1802   -450
ATOM    529  H   GLY A  33      -3.450  58.184  54.605  1.00  0.00           H  
ATOM    530  HA3 GLY A  33      -2.444  60.756  55.383  1.00  0.00           H  
ATOM    531  HA2 GLY A  33      -4.049  60.913  54.663  1.00  0.00           H  
ATOM    532  N   HIS A  34      -2.273  61.389  52.756  1.00 71.27           N  
ANISOU  532  N   HIS A  34     9641   8706   8732     22  -2026   -490
ATOM    533  CA  HIS A  34      -1.670  61.618  51.446  1.00 68.88           C  
ANISOU  533  CA  HIS A  34     9651   8439   8080    221  -2074   -464
ATOM    534  C   HIS A  34      -0.340  62.337  51.645  1.00 64.24           C  
ANISOU  534  C   HIS A  34     9206   7905   7298    194  -1774   -240
ATOM    535  O   HIS A  34      -0.337  63.383  52.292  1.00 62.07           O  
ANISOU  535  O   HIS A  34     8834   7655   7093    103  -1625   -126
ATOM    536  CB  HIS A  34      -2.574  62.540  50.608  1.00 70.30           C  
ANISOU  536  CB  HIS A  34     9943   8618   8149    439  -2322   -555
ATOM    537  CG  HIS A  34      -3.978  62.055  50.382  0.00 76.77           C  
ANISOU  537  CG  HIS A  34    10633   9368   9166    504  -2666   -808
ATOM    538  ND1 HIS A  34      -5.074  62.901  50.420  0.00 78.79           N  
ANISOU  538  ND1 HIS A  34    11062   9587   9286    693  -2920   -977
ATOM    539  CD2 HIS A  34      -4.481  60.800  50.137  0.00 77.40           C  
ANISOU  539  CD2 HIS A  34    10413   9390   9604    411  -2802   -934
ATOM    540  CE1 HIS A  34      -6.158  62.154  50.198  0.00 80.71           C  
ANISOU  540  CE1 HIS A  34    11103   9752   9812    709  -3226  -1214
ATOM    541  NE2 HIS A  34      -5.863  60.877  49.969  0.00 79.92           N  
ANISOU  541  NE2 HIS A  34    10702   9632  10032    533  -3147  -1188
ATOM    542  H   HIS A  34      -2.448  62.222  53.316  1.00  0.00           H  
ATOM    543  HA  HIS A  34      -1.517  60.678  50.920  1.00  0.00           H  
ATOM    544  HB3 HIS A  34      -2.112  62.686  49.632  1.00  0.00           H  
ATOM    545  HB2 HIS A  34      -2.636  63.528  51.064  1.00  0.00           H  
ATOM    546  HD1 HIS A  34      -5.073  63.887  50.694  1.00  0.00           H  
ATOM    547  HD2 HIS A  34      -3.960  59.855  50.078  1.00  0.00           H  
ATOM    548  HE1 HIS A  34      -7.168  62.543  50.205  1.00  0.00           H  
ATOM    549  N   VAL A  35       0.734  61.804  51.054  1.00 59.76           N  
ANISOU  549  N   VAL A  35     8858   7340   6509    281  -1690   -189
ATOM    550  CA  VAL A  35       2.046  62.436  51.031  1.00 53.79           C  
ANISOU  550  CA  VAL A  35     8221   6602   5614    266  -1404      5
ATOM    551  C   VAL A  35       2.183  63.202  49.706  1.00 53.90           C  
ANISOU  551  C   VAL A  35     8541   6601   5336    512  -1381     74
ATOM    552  O   VAL A  35       2.078  62.607  48.627  1.00 54.27           O  
ANISOU  552  O   VAL A  35     8789   6625   5204    706  -1545    -21
ATOM    553  CB  VAL A  35       3.215  61.414  51.130  1.00 52.58           C  
ANISOU  553  CB  VAL A  35     8067   6439   5472    165  -1259     37
ATOM    554  CG1 VAL A  35       4.606  62.087  51.113  1.00 50.88           C  
ANISOU  554  CG1 VAL A  35     7904   6223   5204    124   -971    219
ATOM    555  CG2 VAL A  35       3.093  60.532  52.386  1.00 51.69           C  
ANISOU  555  CG2 VAL A  35     7697   6322   5621    -36  -1281    -36
ATOM    556  H   VAL A  35       0.603  61.031  50.407  1.00  0.00           H  
ATOM    557  HA  VAL A  35       2.144  63.126  51.866  1.00  0.00           H  
ATOM    558  HB  VAL A  35       3.174  60.752  50.266  1.00  0.00           H  
ATOM    559 HG11 VAL A  35       5.399  61.355  51.249  1.00  0.00           H  
ATOM    560 HG12 VAL A  35       4.815  62.596  50.172  1.00  0.00           H  
ATOM    561 HG13 VAL A  35       4.697  62.822  51.913  1.00  0.00           H  
ATOM    562 HG21 VAL A  35       3.898  59.799  52.431  1.00  0.00           H  
ATOM    563 HG22 VAL A  35       3.144  61.131  53.294  1.00  0.00           H  
ATOM    564 HG23 VAL A  35       2.156  59.975  52.404  1.00  0.00           H  
ATOM    565  N   TYR A  36       2.438  64.501  49.827  1.00 48.43           N  
ANISOU  565  N   TYR A  36     7892   5907   4601    520  -1172    236
ATOM    566  CA  TYR A  36       2.783  65.389  48.732  1.00 50.26           C  
ANISOU  566  CA  TYR A  36     8416   6100   4581    753  -1067    343
ATOM    567  C   TYR A  36       4.278  65.685  48.833  1.00 48.60           C  
ANISOU  567  C   TYR A  36     8267   5840   4359    714   -720    528
ATOM    568  O   TYR A  36       4.756  65.994  49.930  1.00 45.66           O  
ANISOU  568  O   TYR A  36     7681   5474   4194    507   -577    588
ATOM    569  CB  TYR A  36       1.988  66.708  48.825  1.00 51.48           C  
ANISOU  569  CB  TYR A  36     8564   6263   4732    821  -1106    378
ATOM    570  CG  TYR A  36       0.469  66.611  48.858  1.00 55.05           C  
ANISOU  570  CG  TYR A  36     8957   6746   5213    894  -1445    201
ATOM    571  CD1 TYR A  36      -0.193  66.172  50.023  1.00 50.42           C  
ANISOU  571  CD1 TYR A  36     8055   6192   4908    689  -1571    101
ATOM    572  CD2 TYR A  36      -0.294  67.014  47.742  1.00 55.88           C  
ANISOU  572  CD2 TYR A  36     9324   6832   5077   1188  -1633    133
ATOM    573  CE1 TYR A  36      -1.596  66.129  50.069  1.00 53.57           C  
ANISOU  573  CE1 TYR A  36     8362   6596   5397    751  -1869    -67
ATOM    574  CE2 TYR A  36      -1.702  66.992  47.798  1.00 59.34           C  
ANISOU  574  CE2 TYR A  36     9682   7286   5579   1266  -1977    -55
ATOM    575  CZ  TYR A  36      -2.355  66.544  48.963  1.00 60.18           C  
ANISOU  575  CZ  TYR A  36     9433   7416   6017   1033  -2090   -155
ATOM    576  OH  TYR A  36      -3.717  66.476  49.005  1.00 62.50           O  
ANISOU  576  OH  TYR A  36     9611   7702   6435   1102  -2416   -346
ATOM    577  H   TYR A  36       2.500  64.913  50.758  1.00  0.00           H  
ATOM    578  HA  TYR A  36       2.595  64.923  47.772  1.00  0.00           H  
ATOM    579  HB3 TYR A  36       2.269  67.310  47.962  1.00  0.00           H  
ATOM    580  HB2 TYR A  36       2.297  67.274  49.705  1.00  0.00           H  
ATOM    581  HD1 TYR A  36       0.365  65.868  50.896  1.00  0.00           H  
ATOM    582  HD2 TYR A  36       0.194  67.366  46.845  1.00  0.00           H  
ATOM    583  HE1 TYR A  36      -2.081  65.780  50.963  1.00  0.00           H  
ATOM    584  HE2 TYR A  36      -2.280  67.317  46.946  1.00  0.00           H  
ATOM    585  HH  TYR A  36      -4.057  66.252  49.888  1.00  0.00           H  
ATOM    586  N   LYS A  37       4.977  65.637  47.692  1.00 49.93           N  
ANISOU  586  N   LYS A  37     8733   5943   4297    932   -586    614
ATOM    587  CA  LYS A  37       6.310  66.214  47.572  1.00 52.04           C  
ANISOU  587  CA  LYS A  37     9068   6124   4583    934   -223    805
ATOM    588  C   LYS A  37       6.148  67.743  47.523  1.00 52.41           C  
ANISOU  588  C   LYS A  37     9146   6128   4638   1001    -95    919
ATOM    589  O   LYS A  37       5.313  68.239  46.764  1.00 55.77           O  
ANISOU  589  O   LYS A  37     9792   6545   4855   1229   -186    916
ATOM    590  CB  LYS A  37       7.027  65.638  46.331  1.00 53.86           C  
ANISOU  590  CB  LYS A  37     9622   6275   4569   1165    -86    868
ATOM    591  CG  LYS A  37       8.505  66.064  46.240  1.00 56.52           C  
ANISOU  591  CG  LYS A  37     9996   6492   4986   1157    322   1063
ATOM    592  CD  LYS A  37       9.306  65.298  45.173  1.00 60.79           C  
ANISOU  592  CD  LYS A  37    10891   6944   5264   1420    470   1134
ATOM    593  CE  LYS A  37      10.808  65.607  45.275  1.00 64.26           C  
ANISOU  593  CE  LYS A  37    11366   7230   5819   1434    916   1339
ATOM    594  NZ  LYS A  37      11.627  64.769  44.385  1.00 66.30           N1+
ANISOU  594  NZ  LYS A  37    11977   7393   5821   1694   1083   1413
ATOM    595  H   LYS A  37       4.502  65.443  46.814  1.00  0.00           H  
ATOM    596  HA  LYS A  37       6.889  65.940  48.457  1.00  0.00           H  
ATOM    597  HB3 LYS A  37       6.497  65.913  45.418  1.00  0.00           H  
ATOM    598  HB2 LYS A  37       6.985  64.549  46.389  1.00  0.00           H  
ATOM    599  HG3 LYS A  37       8.974  65.914  47.214  1.00  0.00           H  
ATOM    600  HG2 LYS A  37       8.570  67.134  46.039  1.00  0.00           H  
ATOM    601  HD3 LYS A  37       8.944  65.569  44.181  1.00  0.00           H  
ATOM    602  HD2 LYS A  37       9.136  64.227  45.276  1.00  0.00           H  
ATOM    603  HE3 LYS A  37      11.157  65.440  46.294  1.00  0.00           H  
ATOM    604  HE2 LYS A  37      10.987  66.654  45.036  1.00  0.00           H  
ATOM    605  HZ1 LYS A  37      12.599  65.011  44.522  1.00  0.00           H  
ATOM    606  HZ2 LYS A  37      11.496  63.795  44.612  1.00  0.00           H  
ATOM    607  HZ3 LYS A  37      11.371  64.933  43.424  1.00  0.00           H  
ATOM    608  N   ALA A  38       6.889  68.442  48.379  1.00 51.27           N  
ANISOU  608  N   ALA A  38     8790   5952   4738    817    101   1009
ATOM    609  CA  ALA A  38       6.730  69.866  48.643  1.00 52.91           C  
ANISOU  609  CA  ALA A  38     8971   6118   5013    835    211   1101
ATOM    610  C   ALA A  38       8.070  70.600  48.538  1.00 54.28           C  
ANISOU  610  C   ALA A  38     9166   6145   5314    841    592   1277
ATOM    611  O   ALA A  38       9.108  70.039  48.884  1.00 53.36           O  
ANISOU  611  O   ALA A  38     8940   5982   5355    723    738   1300
ATOM    612  CB  ALA A  38       6.131  70.023  50.047  1.00 49.62           C  
ANISOU  612  CB  ALA A  38     8248   5786   4820    607     55   1018
ATOM    613  H   ALA A  38       7.545  67.957  48.979  1.00  0.00           H  
ATOM    614  HA  ALA A  38       6.039  70.303  47.925  1.00  0.00           H  
ATOM    615  HB1 ALA A  38       5.949  71.071  50.282  1.00  0.00           H  
ATOM    616  HB2 ALA A  38       5.179  69.495  50.117  1.00  0.00           H  
ATOM    617  HB3 ALA A  38       6.786  69.616  50.817  1.00  0.00           H  
ATOM    618  N   LYS A  39       8.001  71.863  48.093  1.00 56.16           N  
ANISOU  618  N   LYS A  39     9536   6296   5508    984    756   1396
ATOM    619  CA  LYS A  39       9.121  72.799  48.037  1.00 59.45           C  
ANISOU  619  CA  LYS A  39     9927   6540   6121    977   1136   1562
ATOM    620  C   LYS A  39       8.704  74.096  48.734  1.00 60.47           C  
ANISOU  620  C   LYS A  39     9879   6657   6439    875   1139   1577
ATOM    621  O   LYS A  39       7.594  74.578  48.511  1.00 59.96           O  
ANISOU  621  O   LYS A  39     9874   6676   6231    946    945   1532
ATOM    622  CB  LYS A  39       9.509  73.071  46.571  1.00 62.27           C  
ANISOU  622  CB  LYS A  39    10654   6754   6251   1285   1413   1723
ATOM    623  CG  LYS A  39      10.189  71.874  45.887  0.00 66.65           C  
ANISOU  623  CG  LYS A  39    11382   7274   6670   1386   1503   1741
ATOM    624  CD  LYS A  39      10.617  72.199  44.450  0.00 69.79           C  
ANISOU  624  CD  LYS A  39    12208   7528   6782   1744   1769   1902
ATOM    625  CE  LYS A  39      11.375  71.043  43.788  0.00 70.83           C  
ANISOU  625  CE  LYS A  39    12536   7618   6760   1865   1867   1923
ATOM    626  NZ  LYS A  39      11.751  71.377  42.405  0.00 74.08           N1+
ANISOU  626  NZ  LYS A  39    13412   7874   6862   2255   2150   2092
ATOM    627  H   LYS A  39       7.104  72.240  47.816  1.00  0.00           H  
ATOM    628  HA  LYS A  39       9.987  72.390  48.563  1.00  0.00           H  
ATOM    629  HB3 LYS A  39      10.206  73.910  46.541  1.00  0.00           H  
ATOM    630  HB2 LYS A  39       8.632  73.384  46.001  1.00  0.00           H  
ATOM    631  HG3 LYS A  39       9.514  71.018  45.877  1.00  0.00           H  
ATOM    632  HG2 LYS A  39      11.060  71.570  46.469  1.00  0.00           H  
ATOM    633  HD3 LYS A  39      11.244  73.091  44.451  1.00  0.00           H  
ATOM    634  HD2 LYS A  39       9.734  72.444  43.859  1.00  0.00           H  
ATOM    635  HE3 LYS A  39      10.766  70.138  43.783  1.00  0.00           H  
ATOM    636  HE2 LYS A  39      12.284  70.818  44.347  1.00  0.00           H  
ATOM    637  HZ1 LYS A  39      12.252  70.601  41.997  1.00  0.00           H  
ATOM    638  HZ2 LYS A  39      10.919  71.565  41.864  1.00  0.00           H  
ATOM    639  HZ3 LYS A  39      12.345  72.194  42.409  1.00  0.00           H  
ATOM    640  N   ARG A  40       9.608  74.631  49.568  1.00 63.68           N  
ANISOU  640  N   ARG A  40    10062   6953   7182    716   1345   1628
ATOM    641  CA  ARG A  40       9.381  75.823  50.381  1.00 65.76           C  
ANISOU  641  CA  ARG A  40    10147   7182   7657    616   1360   1636
ATOM    642  C   ARG A  40       9.411  77.101  49.522  1.00 69.48           C  
ANISOU  642  C   ARG A  40    10851   7527   8021    836   1590   1791
ATOM    643  O   ARG A  40      10.401  77.346  48.833  1.00 68.94           O  
ANISOU  643  O   ARG A  40    10977   7300   7919   1000   1906   1936
ATOM    644  CB  ARG A  40      10.438  75.832  51.496  1.00 66.44           C  
ANISOU  644  CB  ARG A  40     9937   7154   8154    413   1503   1624
ATOM    645  CG  ARG A  40      10.241  76.884  52.597  1.00 67.86           C  
ANISOU  645  CG  ARG A  40     9863   7376   8544    242   1341   1531
ATOM    646  CD  ARG A  40      11.366  76.778  53.634  1.00 68.98           C  
ANISOU  646  CD  ARG A  40     9720   7426   9063     61   1387   1463
ATOM    647  NE  ARG A  40      11.102  77.575  54.836  0.00 71.03           N  
ANISOU  647  NE  ARG A  40     9771   7713   9504    -68   1222   1364
ATOM    648  CZ  ARG A  40      11.955  77.694  55.868  0.00 70.85           C  
ANISOU  648  CZ  ARG A  40     9502   7611   9808   -202   1195   1271
ATOM    649  NH1 ARG A  40      13.142  77.066  55.865  0.00 71.51           N  
ANISOU  649  NH1 ARG A  40     9477   7577  10117   -244   1322   1260
ATOM    650  NH2 ARG A  40      11.610  78.449  56.919  0.00 70.07           N1+
ANISOU  650  NH2 ARG A  40     9265   7544   9814   -280   1024   1177
ATOM    651  H   ARG A  40      10.508  74.186  49.676  1.00  0.00           H  
ATOM    652  HA  ARG A  40       8.400  75.726  50.849  1.00  0.00           H  
ATOM    653  HB3 ARG A  40      11.420  75.963  51.050  1.00  0.00           H  
ATOM    654  HB2 ARG A  40      10.448  74.848  51.969  1.00  0.00           H  
ATOM    655  HG3 ARG A  40       9.258  76.821  53.065  1.00  0.00           H  
ATOM    656  HG2 ARG A  40      10.301  77.865  52.124  1.00  0.00           H  
ATOM    657  HD3 ARG A  40      12.254  77.244  53.207  1.00  0.00           H  
ATOM    658  HD2 ARG A  40      11.632  75.744  53.859  1.00  0.00           H  
ATOM    659  HE  ARG A  40      10.208  78.044  54.880  1.00  0.00           H  
ATOM    660 HH12 ARG A  40      13.777  77.155  56.644  1.00  0.00           H  
ATOM    661 HH11 ARG A  40      13.405  76.483  55.081  1.00  0.00           H  
ATOM    662 HH22 ARG A  40      12.236  78.549  57.705  1.00  0.00           H  
ATOM    663 HH21 ARG A  40      10.720  78.927  56.934  1.00  0.00           H  
ATOM    664  N   LYS A  41       8.318  77.877  49.587  1.00 72.71           N  
ANISOU  664  N   LYS A  41    11259   8002   8366    856   1444   1767
ATOM    665  CA  LYS A  41       8.103  79.101  48.815  1.00 77.15           C  
ANISOU  665  CA  LYS A  41    12041   8451   8820   1069   1644   1910
ATOM    666  C   LYS A  41       8.996  80.277  49.250  1.00 80.94           C  
ANISOU  666  C   LYS A  41    12350   8734   9669    976   1952   2010
ATOM    667  O   LYS A  41       9.492  80.998  48.384  1.00 83.67           O  
ANISOU  667  O   LYS A  41    12879   8893  10019   1152   2292   2180
ATOM    668  CB  LYS A  41       6.610  79.496  48.894  1.00 75.92           C  
ANISOU  668  CB  LYS A  41    11948   8445   8454   1139   1347   1834
ATOM    669  CG  LYS A  41       5.683  78.585  48.070  1.00 74.10           C  
ANISOU  669  CG  LYS A  41    11975   8338   7840   1345   1098   1763
ATOM    670  CD  LYS A  41       4.198  78.963  48.209  1.00 68.67           C  
ANISOU  670  CD  LYS A  41    11272   7787   7032   1380    779   1660
ATOM    671  CE  LYS A  41       3.312  78.307  47.141  1.00 69.01           C  
ANISOU  671  CE  LYS A  41    11576   7920   6725   1623    518   1572
ATOM    672  NZ  LYS A  41       1.895  78.665  47.304  1.00 67.95           N1+
ANISOU  672  NZ  LYS A  41    11372   7910   6537   1638    182   1445
ATOM    673  H   LYS A  41       7.560  77.608  50.202  1.00  0.00           H  
ATOM    674  HA  LYS A  41       8.342  78.879  47.773  1.00  0.00           H  
ATOM    675  HB3 LYS A  41       6.486  80.512  48.516  1.00  0.00           H  
ATOM    676  HB2 LYS A  41       6.284  79.526  49.936  1.00  0.00           H  
ATOM    677  HG3 LYS A  41       5.822  77.546  48.370  1.00  0.00           H  
ATOM    678  HG2 LYS A  41       5.976  78.640  47.021  1.00  0.00           H  
ATOM    679  HD3 LYS A  41       4.083  80.047  48.172  1.00  0.00           H  
ATOM    680  HD2 LYS A  41       3.850  78.651  49.194  1.00  0.00           H  
ATOM    681  HE3 LYS A  41       3.390  77.225  47.196  1.00  0.00           H  
ATOM    682  HE2 LYS A  41       3.636  78.603  46.143  1.00  0.00           H  
ATOM    683  HZ1 LYS A  41       1.782  79.664  47.216  1.00  0.00           H  
ATOM    684  HZ2 LYS A  41       1.352  78.198  46.591  1.00  0.00           H  
ATOM    685  HZ3 LYS A  41       1.570  78.369  48.218  1.00  0.00           H  
ATOM    686  N   ASP A  42       9.150  80.467  50.571  1.00 82.32           N  
ANISOU  686  N   ASP A  42    12185   8935  10156    716   1832   1900
ATOM    687  CA  ASP A  42       9.730  81.672  51.173  1.00 84.81           C  
ANISOU  687  CA  ASP A  42    12301   9078  10846    614   2031   1942
ATOM    688  C   ASP A  42      11.260  81.754  51.036  1.00 88.18           C  
ANISOU  688  C   ASP A  42    12643   9253  11607    595   2407   2039
ATOM    689  O   ASP A  42      11.765  82.719  50.463  1.00 89.83           O  
ANISOU  689  O   ASP A  42    13004   9258  11871    752   2769   2211
ATOM    690  CB  ASP A  42       9.337  81.904  52.660  0.00 86.80           C  
ANISOU  690  CB  ASP A  42    12244   9439  11299    377   1741   1770
ATOM    691  CG  ASP A  42       7.849  81.825  53.029  0.00 85.55           C  
ANISOU  691  CG  ASP A  42    12135   9477  10893    394   1438   1698
ATOM    692  OD1 ASP A  42       7.041  81.294  52.236  0.00 85.76           O  
ANISOU  692  OD1 ASP A  42    12383   9620  10581    543   1325   1711
ATOM    693  OD2 ASP A  42       7.553  82.267  54.160  0.00 84.44           O1-
ANISOU  693  OD2 ASP A  42    11808   9364  10911    269   1306   1618
ATOM    694  H   ASP A  42       8.669  79.849  51.210  1.00  0.00           H  
ATOM    695  HA  ASP A  42       9.322  82.520  50.618  1.00  0.00           H  
ATOM    696  HB3 ASP A  42       9.687  82.897  52.946  1.00  0.00           H  
ATOM    697  HB2 ASP A  42       9.853  81.180  53.292  1.00  0.00           H  
ATOM    698  N   GLY A  43      11.962  80.767  51.617  1.00 88.61           N  
ANISOU  698  N   GLY A  43    12459   9311  11897    416   2330   1929
ATOM    699  CA  GLY A  43      13.391  80.852  51.926  1.00 90.12           C  
ANISOU  699  CA  GLY A  43    12458   9251  12531    345   2633   1972
ATOM    700  C   GLY A  43      14.325  80.508  50.757  1.00 91.82           C  
ANISOU  700  C   GLY A  43    12867   9337  12684    495   2957   2119
ATOM    701  O   GLY A  43      15.535  80.489  50.973  1.00 93.52           O  
ANISOU  701  O   GLY A  43    12903   9370  13258    422   3170   2130
ATOM    702  H   GLY A  43      11.457  79.999  52.034  1.00  0.00           H  
ATOM    703  HA3 GLY A  43      13.598  80.162  52.744  1.00  0.00           H  
ATOM    704  HA2 GLY A  43      13.637  81.850  52.293  1.00  0.00           H  
ATOM    705  N   LYS A  44      13.791  80.213  49.554  0.00 98.05           N  
ANISOU  705  N   LYS A  44    13997  10156  13103    714   3063   2240
ATOM    706  CA  LYS A  44      14.522  79.741  48.365  0.00100.06           C  
ANISOU  706  CA  LYS A  44    14467  10284  13267    882   3374   2380
ATOM    707  C   LYS A  44      15.211  78.379  48.616  0.00 98.95           C  
ANISOU  707  C   LYS A  44    14161  10214  13222    736   3242   2265
ATOM    708  O   LYS A  44      16.333  78.163  48.155  0.00100.44           O  
ANISOU  708  O   LYS A  44    14267  10203  13692    729   3547   2338
ATOM    709  CB  LYS A  44      15.523  80.808  47.843  0.00103.06           C  
ANISOU  709  CB  LYS A  44    14838  10315  14007    969   3912   2573
ATOM    710  CG  LYS A  44      14.910  82.183  47.528  0.00104.37           C  
ANISOU  710  CG  LYS A  44    15108  10371  14176   1081   4075   2684
ATOM    711  CD  LYS A  44      15.977  83.173  47.035  0.00107.47           C  
ANISOU  711  CD  LYS A  44    15438  10382  15014   1139   4639   2870
ATOM    712  CE  LYS A  44      15.418  84.574  46.759  0.00108.84           C  
ANISOU  712  CE  LYS A  44    15716  10435  15205   1251   4818   2985
ATOM    713  NZ  LYS A  44      16.481  85.492  46.312  0.00112.13           N1+
ANISOU  713  NZ  LYS A  44    16058  10445  16102   1307   5405   3172
ATOM    714  H   LYS A  44      12.787  80.270  49.450  1.00  0.00           H  
ATOM    715  HA  LYS A  44      13.775  79.570  47.589  1.00  0.00           H  
ATOM    716  HB3 LYS A  44      15.999  80.435  46.934  1.00  0.00           H  
ATOM    717  HB2 LYS A  44      16.332  80.943  48.562  1.00  0.00           H  
ATOM    718  HG3 LYS A  44      14.428  82.589  48.418  1.00  0.00           H  
ATOM    719  HG2 LYS A  44      14.128  82.073  46.777  1.00  0.00           H  
ATOM    720  HD3 LYS A  44      16.438  82.781  46.127  1.00  0.00           H  
ATOM    721  HD2 LYS A  44      16.774  83.240  47.776  1.00  0.00           H  
ATOM    722  HE3 LYS A  44      14.960  84.983  47.661  1.00  0.00           H  
ATOM    723  HE2 LYS A  44      14.643  84.531  45.993  1.00  0.00           H  
ATOM    724  HZ1 LYS A  44      16.895  85.139  45.461  1.00  0.00           H  
ATOM    725  HZ2 LYS A  44      16.087  86.406  46.140  1.00  0.00           H  
ATOM    726  HZ3 LYS A  44      17.190  85.561  47.028  1.00  0.00           H  
ATOM    727  N   ASP A  45      14.542  77.509  49.393  1.00 93.04           N  
ANISOU  727  N   ASP A  45    13346   9732  12275    617   2806   2087
ATOM    728  CA  ASP A  45      15.088  76.257  49.914  1.00 91.19           C  
ANISOU  728  CA  ASP A  45    12955   9590  12103    475   2635   1962
ATOM    729  C   ASP A  45      15.248  75.230  48.781  1.00 91.60           C  
ANISOU  729  C   ASP A  45    13296   9638  11871    655   2776   2053
ATOM    730  O   ASP A  45      14.284  74.945  48.069  1.00 92.82           O  
ANISOU  730  O   ASP A  45    13769   9897  11600    847   2690   2090
ATOM    731  CB  ASP A  45      14.191  75.705  51.048  1.00 89.10           C  
ANISOU  731  CB  ASP A  45    12583   9596  11677    332   2166   1769
ATOM    732  CG  ASP A  45      14.914  74.870  52.108  1.00 87.86           C  
ANISOU  732  CG  ASP A  45    12161   9491  11732    136   1999   1621
ATOM    733  OD1 ASP A  45      15.958  74.262  51.786  1.00 88.61           O  
ANISOU  733  OD1 ASP A  45    12259   9514  11894    147   2140   1648
ATOM    734  OD2 ASP A  45      14.357  74.804  53.227  1.00 83.91           O1-
ANISOU  734  OD2 ASP A  45    11467   9100  11316    -11   1726   1479
ATOM    735  H   ASP A  45      13.616  77.751  49.714  1.00  0.00           H  
ATOM    736  HA  ASP A  45      16.073  76.491  50.326  1.00  0.00           H  
ATOM    737  HB3 ASP A  45      13.395  75.086  50.636  1.00  0.00           H  
ATOM    738  HB2 ASP A  45      13.726  76.549  51.557  1.00  0.00           H  
ATOM    739  N   ASP A  46      16.473  74.696  48.661  1.00 90.56           N  
ANISOU  739  N   ASP A  46    13055   9373  11981    609   2982   2081
ATOM    740  CA  ASP A  46      16.852  73.658  47.703  1.00 89.66           C  
ANISOU  740  CA  ASP A  46    13199   9251  11618    768   3112   2157
ATOM    741  C   ASP A  46      16.268  72.282  48.094  1.00 84.08           C  
ANISOU  741  C   ASP A  46    12520   8805  10620    701   2709   1993
ATOM    742  O   ASP A  46      16.006  71.468  47.208  1.00 84.12           O  
ANISOU  742  O   ASP A  46    12825   8875  10262    877   2686   2024
ATOM    743  CB  ASP A  46      18.395  73.592  47.581  0.00 94.59           C  
ANISOU  743  CB  ASP A  46    13661   9635  12646    727   3475   2236
ATOM    744  CG  ASP A  46      18.928  72.734  46.426  0.00 96.34           C  
ANISOU  744  CG  ASP A  46    14194   9792  12621    938   3715   2364
ATOM    745  OD1 ASP A  46      18.292  72.746  45.349  0.00 97.99           O  
ANISOU  745  OD1 ASP A  46    14791   9957  12483   1210   3887   2509
ATOM    746  OD2 ASP A  46      20.024  72.164  46.612  0.00 95.87           O1-
ANISOU  746  OD2 ASP A  46    14004   9717  12706    849   3730   2317
ATOM    747  H   ASP A  46      17.199  74.991  49.298  1.00  0.00           H  
ATOM    748  HA  ASP A  46      16.430  73.936  46.735  1.00  0.00           H  
ATOM    749  HB3 ASP A  46      18.799  73.194  48.514  1.00  0.00           H  
ATOM    750  HB2 ASP A  46      18.806  74.596  47.467  1.00  0.00           H  
ATOM    751  N   LYS A  47      16.074  72.051  49.406  1.00 78.82           N  
ANISOU  751  N   LYS A  47    11554   8273  10119    465   2400   1819
ATOM    752  CA  LYS A  47      15.578  70.794  49.961  1.00 74.40           C  
ANISOU  752  CA  LYS A  47    10968   7924   9379    373   2068   1668
ATOM    753  C   LYS A  47      14.099  70.545  49.636  1.00 70.20           C  
ANISOU  753  C   LYS A  47    10643   7589   8442    462   1775   1605
ATOM    754  O   LYS A  47      13.271  71.447  49.780  1.00 68.03           O  
ANISOU  754  O   LYS A  47    10424   7340   8083    514   1712   1620
ATOM    755  CB  LYS A  47      15.788  70.776  51.488  1.00 72.50           C  
ANISOU  755  CB  LYS A  47    10373   7742   9430    130   1854   1511
ATOM    756  CG  LYS A  47      17.268  70.755  51.903  0.00 77.01           C  
ANISOU  756  CG  LYS A  47    10705   8132  10425     38   2059   1517
ATOM    757  CD  LYS A  47      17.437  70.581  53.419  0.00 75.37           C  
ANISOU  757  CD  LYS A  47    10192   7993  10452   -156   1793   1339
ATOM    758  CE  LYS A  47      18.908  70.500  53.846  0.00 76.49           C  
ANISOU  758  CE  LYS A  47    10074   7940  11047   -232   1953   1312
ATOM    759  NZ  LYS A  47      19.024  70.287  55.299  0.00 75.13           N1+
ANISOU  759  NZ  LYS A  47     9640   7831  11074   -377   1661   1120
ATOM    760  H   LYS A  47      16.270  72.784  50.075  1.00  0.00           H  
ATOM    761  HA  LYS A  47      16.171  69.987  49.525  1.00  0.00           H  
ATOM    762  HB3 LYS A  47      15.311  69.883  51.897  1.00  0.00           H  
ATOM    763  HB2 LYS A  47      15.281  71.623  51.951  1.00  0.00           H  
ATOM    764  HG3 LYS A  47      17.752  71.680  51.588  1.00  0.00           H  
ATOM    765  HG2 LYS A  47      17.781  69.944  51.384  1.00  0.00           H  
ATOM    766  HD3 LYS A  47      16.913  69.680  53.740  1.00  0.00           H  
ATOM    767  HD2 LYS A  47      16.953  71.414  53.930  1.00  0.00           H  
ATOM    768  HE3 LYS A  47      19.434  71.416  53.578  1.00  0.00           H  
ATOM    769  HE2 LYS A  47      19.407  69.677  53.333  1.00  0.00           H  
ATOM    770  HZ1 LYS A  47      18.561  69.425  55.551  1.00  0.00           H  
ATOM    771  HZ2 LYS A  47      19.998  70.236  55.560  1.00  0.00           H  
ATOM    772  HZ3 LYS A  47      18.584  71.055  55.787  1.00  0.00           H  
ATOM    773  N   ASP A  48      13.813  69.290  49.263  1.00 65.51           N  
ANISOU  773  N   ASP A  48    10149   7116   7625    480   1596   1526
ATOM    774  CA  ASP A  48      12.466  68.740  49.138  1.00 61.56           C  
ANISOU  774  CA  ASP A  48     9788   6791   6812    539   1279   1424
ATOM    775  C   ASP A  48      11.961  68.279  50.515  1.00 56.65           C  
ANISOU  775  C   ASP A  48     8901   6315   6307    317    983   1265
ATOM    776  O   ASP A  48      12.731  67.743  51.314  1.00 54.13           O  
ANISOU  776  O   ASP A  48     8373   5994   6201    157    983   1215
ATOM    777  CB  ASP A  48      12.393  67.578  48.119  1.00 63.10           C  
ANISOU  777  CB  ASP A  48    10231   7017   6728    687   1239   1408
ATOM    778  CG  ASP A  48      12.933  67.916  46.725  1.00 66.79           C  
ANISOU  778  CG  ASP A  48    11032   7335   7009    964   1534   1571
ATOM    779  OD1 ASP A  48      12.677  69.049  46.263  1.00 66.74           O  
ANISOU  779  OD1 ASP A  48    11193   7284   6882   1125   1599   1649
ATOM    780  OD2 ASP A  48      13.487  66.992  46.090  1.00 65.98           O1-
ANISOU  780  OD2 ASP A  48    11044   7156   6869   1038   1711   1628
ATOM    781  H   ASP A  48      14.565  68.625  49.159  1.00  0.00           H  
ATOM    782  HA  ASP A  48      11.805  69.534  48.783  1.00  0.00           H  
ATOM    783  HB3 ASP A  48      11.367  67.220  48.017  1.00  0.00           H  
ATOM    784  HB2 ASP A  48      12.984  66.746  48.503  1.00  0.00           H  
ATOM    785  N   TYR A  49      10.673  68.530  50.747  1.00 54.26           N  
ANISOU  785  N   TYR A  49     8621   6129   5866    330    737   1188
ATOM    786  CA  TYR A  49       9.934  68.206  51.959  1.00 50.66           C  
ANISOU  786  CA  TYR A  49     7951   5799   5501    153    481   1052
ATOM    787  C   TYR A  49       8.800  67.244  51.590  1.00 48.12           C  
ANISOU  787  C   TYR A  49     7722   5591   4972    203    219    940
ATOM    788  O   TYR A  49       8.348  67.233  50.442  1.00 46.26           O  
ANISOU  788  O   TYR A  49     7721   5349   4508    392    184    950
ATOM    789  CB  TYR A  49       9.336  69.498  52.549  1.00 52.40           C  
ANISOU  789  CB  TYR A  49     8042   6020   5846     94    452   1060
ATOM    790  CG  TYR A  49      10.330  70.466  53.164  1.00 56.43           C  
ANISOU  790  CG  TYR A  49     8405   6407   6628     18    664   1129
ATOM    791  CD1 TYR A  49      10.496  70.505  54.563  1.00 58.98           C  
ANISOU  791  CD1 TYR A  49     8830   6584   6994    132    928   1265
ATOM    792  CD2 TYR A  49      11.074  71.345  52.348  1.00 60.98           C  
ANISOU  792  CD2 TYR A  49     8743   6995   7433   -151    599   1050
ATOM    793  CE1 TYR A  49      11.382  71.432  55.144  1.00 62.23           C  
ANISOU  793  CE1 TYR A  49     9070   6852   7723     55   1122   1311
ATOM    794  CE2 TYR A  49      11.972  72.261  52.927  1.00 62.47           C  
ANISOU  794  CE2 TYR A  49     8775   7053   7908   -210    750   1079
ATOM    795  CZ  TYR A  49      12.120  72.309  54.328  1.00 64.01           C  
ANISOU  795  CZ  TYR A  49     9036   7093   8193   -120   1011   1204
ATOM    796  OH  TYR A  49      12.977  73.196  54.907  1.00 69.68           O  
ANISOU  796  OH  TYR A  49     9566   7654   9255   -186   1160   1216
ATOM    797  H   TYR A  49      10.116  68.963  50.012  1.00  0.00           H  
ATOM    798  HA  TYR A  49      10.582  67.731  52.699  1.00  0.00           H  
ATOM    799  HB3 TYR A  49       8.619  69.229  53.324  1.00  0.00           H  
ATOM    800  HB2 TYR A  49       8.763  70.034  51.792  1.00  0.00           H  
ATOM    801  HD1 TYR A  49       9.942  69.830  55.200  1.00  0.00           H  
ATOM    802  HD2 TYR A  49      10.967  71.315  51.272  1.00  0.00           H  
ATOM    803  HE1 TYR A  49      11.500  71.463  56.217  1.00  0.00           H  
ATOM    804  HE2 TYR A  49      12.545  72.913  52.284  1.00  0.00           H  
ATOM    805  HH  TYR A  49      13.522  73.686  54.270  1.00  0.00           H  
ATOM    806  N   ALA A  50       8.355  66.462  52.569  1.00 45.37           N  
ANISOU  806  N   ALA A  50     7193   5329   4718     49     42    827
ATOM    807  CA  ALA A  50       7.172  65.626  52.470  1.00 44.03           C  
ANISOU  807  CA  ALA A  50     7034   5243   4451     60   -209    702
ATOM    808  C   ALA A  50       6.109  66.250  53.370  1.00 42.46           C  
ANISOU  808  C   ALA A  50     6677   5098   4359    -21   -344    652
ATOM    809  O   ALA A  50       6.314  66.319  54.581  1.00 43.88           O  
ANISOU  809  O   ALA A  50     6681   5284   4707   -160   -304    656
ATOM    810  CB  ALA A  50       7.519  64.209  52.935  1.00 40.21           C  
ANISOU  810  CB  ALA A  50     6475   4788   4013    -41   -262    624
ATOM    811  H   ALA A  50       8.738  66.561  53.510  1.00  0.00           H  
ATOM    812  HA  ALA A  50       6.796  65.567  51.448  1.00  0.00           H  
ATOM    813  HB1 ALA A  50       8.075  63.675  52.170  1.00  0.00           H  
ATOM    814  HB2 ALA A  50       8.138  64.228  53.829  1.00  0.00           H  
ATOM    815  HB3 ALA A  50       6.625  63.624  53.155  1.00  0.00           H  
ATOM    816  N   LEU A  51       5.008  66.696  52.767  1.00 43.93           N  
ANISOU  816  N   LEU A  51     6935   5311   4445     84   -509    599
ATOM    817  CA  LEU A  51       3.814  67.115  53.488  1.00 42.35           C  
ANISOU  817  CA  LEU A  51     6583   5154   4352     21   -649    540
ATOM    818  C   LEU A  51       2.860  65.923  53.476  1.00 43.80           C  
ANISOU  818  C   LEU A  51     6695   5371   4577     -2   -868    393
ATOM    819  O   LEU A  51       2.355  65.590  52.404  1.00 42.97           O  
ANISOU  819  O   LEU A  51     6723   5261   4342    135  -1015    317
ATOM    820  CB  LEU A  51       3.183  68.339  52.784  1.00 44.28           C  
ANISOU  820  CB  LEU A  51     6938   5389   4499    164   -675    584
ATOM    821  CG  LEU A  51       3.761  69.689  53.249  1.00 50.28           C  
ANISOU  821  CG  LEU A  51     7680   6106   5320    143   -477    714
ATOM    822  CD1 LEU A  51       3.260  70.822  52.342  1.00 50.09           C  
ANISOU  822  CD1 LEU A  51     7828   6055   5147    331   -478    770
ATOM    823  CD2 LEU A  51       3.407  69.976  54.724  1.00 46.23           C  
ANISOU  823  CD2 LEU A  51     6938   5619   5008    -25   -492    694
ATOM    824  H   LEU A  51       4.898  66.549  51.766  1.00  0.00           H  
ATOM    825  HA  LEU A  51       4.042  67.362  54.525  1.00  0.00           H  
ATOM    826  HB3 LEU A  51       2.107  68.351  52.950  1.00  0.00           H  
ATOM    827  HB2 LEU A  51       3.299  68.236  51.704  1.00  0.00           H  
ATOM    828  HG  LEU A  51       4.848  69.656  53.160  1.00  0.00           H  
ATOM    829 HD11 LEU A  51       3.319  71.790  52.835  1.00  0.00           H  
ATOM    830 HD12 LEU A  51       3.855  70.898  51.436  1.00  0.00           H  
ATOM    831 HD13 LEU A  51       2.223  70.668  52.037  1.00  0.00           H  
ATOM    832 HD21 LEU A  51       3.497  71.033  54.968  1.00  0.00           H  
ATOM    833 HD22 LEU A  51       2.390  69.666  54.964  1.00  0.00           H  
ATOM    834 HD23 LEU A  51       4.074  69.448  55.404  1.00  0.00           H  
ATOM    835  N   LYS A  52       2.647  65.296  54.638  1.00 43.37           N  
ANISOU  835  N   LYS A  52     6436   5332   4712   -158   -885    349
ATOM    836  CA  LYS A  52       1.636  64.264  54.804  1.00 45.13           C  
ANISOU  836  CA  LYS A  52     6539   5552   5055   -201  -1054    215
ATOM    837  C   LYS A  52       0.372  64.925  55.373  1.00 45.85           C  
ANISOU  837  C   LYS A  52     6494   5645   5282   -214  -1148    180
ATOM    838  O   LYS A  52       0.356  65.312  56.539  1.00 45.23           O  
ANISOU  838  O   LYS A  52     6306   5570   5308   -303  -1038    246
ATOM    839  CB  LYS A  52       2.151  63.086  55.659  1.00 44.50           C  
ANISOU  839  CB  LYS A  52     6338   5462   5109   -347   -961    207
ATOM    840  CG  LYS A  52       1.240  61.843  55.547  1.00 48.71           C  
ANISOU  840  CG  LYS A  52     6735   5959   5814   -400  -1083     78
ATOM    841  CD  LYS A  52       1.836  60.544  56.122  1.00 54.51           C  
ANISOU  841  CD  LYS A  52     7371   6670   6670   -526   -941    102
ATOM    842  CE  LYS A  52       1.853  60.480  57.656  1.00 60.74           C  
ANISOU  842  CE  LYS A  52     8017   7392   7670   -580  -1013    -11
ATOM    843  NZ  LYS A  52       2.272  59.151  58.129  1.00 58.40           N1+
ANISOU  843  NZ  LYS A  52     7669   7061   7460   -672   -849     24
ATOM    844  H   LYS A  52       3.073  65.660  55.492  1.00  0.00           H  
ATOM    845  HA  LYS A  52       1.405  63.843  53.835  1.00  0.00           H  
ATOM    846  HB3 LYS A  52       2.264  63.391  56.698  1.00  0.00           H  
ATOM    847  HB2 LYS A  52       3.146  62.814  55.304  1.00  0.00           H  
ATOM    848  HG3 LYS A  52       1.009  61.666  54.495  1.00  0.00           H  
ATOM    849  HG2 LYS A  52       0.279  62.045  56.022  1.00  0.00           H  
ATOM    850  HD3 LYS A  52       2.853  60.410  55.750  1.00  0.00           H  
ATOM    851  HD2 LYS A  52       1.269  59.697  55.732  1.00  0.00           H  
ATOM    852  HE3 LYS A  52       0.856  60.678  58.051  1.00  0.00           H  
ATOM    853  HE2 LYS A  52       2.521  61.231  58.076  1.00  0.00           H  
ATOM    854  HZ1 LYS A  52       1.684  58.437  57.725  1.00  0.00           H  
ATOM    855  HZ2 LYS A  52       3.230  58.964  57.862  1.00  0.00           H  
ATOM    856  HZ3 LYS A  52       2.175  59.128  59.136  1.00  0.00           H  
ATOM    857  N   GLN A  53      -0.649  65.057  54.527  1.00 48.47           N  
ANISOU  857  N   GLN A  53     6838   5967   5611   -108  -1360     70
ATOM    858  CA  GLN A  53      -2.010  65.434  54.895  1.00 52.67           C  
ANISOU  858  CA  GLN A  53     7202   6484   6327   -124  -1474      8
ATOM    859  C   GLN A  53      -2.663  64.215  55.559  1.00 55.45           C  
ANISOU  859  C   GLN A  53     7342   6778   6947   -238  -1524   -103
ATOM    860  O   GLN A  53      -2.726  63.179  54.899  1.00 56.30           O  
ANISOU  860  O   GLN A  53     7452   6852   7090   -201  -1677   -233
ATOM    861  CB  GLN A  53      -2.745  65.795  53.589  1.00 55.10           C  
ANISOU  861  CB  GLN A  53     7614   6793   6528     65  -1703    -79
ATOM    862  CG  GLN A  53      -4.221  66.208  53.727  1.00 60.54           C  
ANISOU  862  CG  GLN A  53     8141   7468   7395     69  -1813   -128
ATOM    863  CD  GLN A  53      -4.875  66.418  52.360  1.00 67.99           C  
ANISOU  863  CD  GLN A  53     9192   8408   8235    282  -2083   -243
ATOM    864  OE1 GLN A  53      -4.720  65.614  51.437  1.00 75.72           O  
ANISOU  864  OE1 GLN A  53    10176   9400   9192    355  -2117   -210
ATOM    865  NE2 GLN A  53      -5.635  67.493  52.204  1.00 72.34           N  
ANISOU  865  NE2 GLN A  53     9839   8933   8713    401  -2290   -387
ATOM    866  H   GLN A  53      -0.545  64.627  53.610  1.00  0.00           H  
ATOM    867  HA  GLN A  53      -2.005  66.289  55.572  1.00  0.00           H  
ATOM    868  HB3 GLN A  53      -2.688  64.935  52.922  1.00  0.00           H  
ATOM    869  HB2 GLN A  53      -2.205  66.600  53.095  1.00  0.00           H  
ATOM    870  HG3 GLN A  53      -4.291  67.114  54.331  1.00  0.00           H  
ATOM    871  HG2 GLN A  53      -4.793  65.438  54.246  1.00  0.00           H  
ATOM    872 HE22 GLN A  53      -6.088  67.671  51.321  1.00  0.00           H  
ATOM    873 HE21 GLN A  53      -5.700  68.184  52.936  1.00  0.00           H  
ATOM    874  N   ILE A  54      -3.139  64.334  56.802  1.00 58.31           N  
ANISOU  874  N   ILE A  54     7536   7115   7504   -363  -1381    -50
ATOM    875  CA  ILE A  54      -3.888  63.267  57.469  1.00 61.01           C  
ANISOU  875  CA  ILE A  54     7686   7375   8122   -469  -1349   -120
ATOM    876  C   ILE A  54      -5.325  63.223  56.895  1.00 64.71           C  
ANISOU  876  C   ILE A  54     7982   7767   8836   -432  -1564   -281
ATOM    877  O   ILE A  54      -5.897  64.280  56.616  1.00 65.89           O  
ANISOU  877  O   ILE A  54     8090   7926   9020   -372  -1652   -290
ATOM    878  CB  ILE A  54      -3.928  63.461  59.017  1.00 61.12           C  
ANISOU  878  CB  ILE A  54     7608   7365   8251   -570  -1108     -3
ATOM    879  CG1 ILE A  54      -2.491  63.525  59.599  1.00 59.10           C  
ANISOU  879  CG1 ILE A  54     7501   7166   7788   -595   -942    114
ATOM    880  CG2 ILE A  54      -4.746  62.368  59.746  1.00 64.72           C  
ANISOU  880  CG2 ILE A  54     7878   7705   9006   -653  -1030    -58
ATOM    881  CD1 ILE A  54      -2.417  63.690  61.127  1.00 56.82           C  
ANISOU  881  CD1 ILE A  54     7173   6852   7566   -651   -737    210
ATOM    882  H   ILE A  54      -3.125  65.238  57.271  1.00  0.00           H  
ATOM    883  HA  ILE A  54      -3.394  62.317  57.258  1.00  0.00           H  
ATOM    884  HB  ILE A  54      -4.416  64.415  59.214  1.00  0.00           H  
ATOM    885 HG13 ILE A  54      -1.934  64.341  59.138  1.00  0.00           H  
ATOM    886 HG12 ILE A  54      -1.957  62.613  59.327  1.00  0.00           H  
ATOM    887 HG21 ILE A  54      -4.752  62.513  60.824  1.00  0.00           H  
ATOM    888 HG22 ILE A  54      -5.794  62.365  59.447  1.00  0.00           H  
ATOM    889 HG23 ILE A  54      -4.340  61.375  59.554  1.00  0.00           H  
ATOM    890 HD11 ILE A  54      -1.524  64.241  61.419  1.00  0.00           H  
ATOM    891 HD12 ILE A  54      -3.279  64.227  61.523  1.00  0.00           H  
ATOM    892 HD13 ILE A  54      -2.373  62.720  61.624  1.00  0.00           H  
ATOM    893  N   GLU A  55      -5.857  62.012  56.678  1.00 67.86           N  
ANISOU  893  N   GLU A  55     8276   8083   9425   -463  -1656   -417
ATOM    894  CA  GLU A  55      -7.179  61.797  56.091  1.00 71.05           C  
ANISOU  894  CA  GLU A  55     8491   8388  10118   -424  -1900   -613
ATOM    895  C   GLU A  55      -8.303  61.877  57.150  1.00 72.70           C  
ANISOU  895  C   GLU A  55     8436   8500  10686   -506  -1791   -598
ATOM    896  O   GLU A  55      -8.064  61.634  58.333  1.00 72.51           O  
ANISOU  896  O   GLU A  55     8347   8435  10768   -614  -1509   -474
ATOM    897  CB  GLU A  55      -7.173  60.473  55.287  1.00 72.93           C  
ANISOU  897  CB  GLU A  55     8662   8537  10513   -451  -2004   -767
ATOM    898  CG  GLU A  55      -8.436  60.159  54.450  1.00 75.32           C  
ANISOU  898  CG  GLU A  55     8815   8740  11064   -363  -2351  -1022
ATOM    899  CD  GLU A  55      -8.767  61.237  53.413  0.00 80.58           C  
ANISOU  899  CD  GLU A  55     9695   9487  11435   -152  -2658  -1117
ATOM    900  OE1 GLU A  55      -8.458  61.010  52.226  0.00 79.63           O  
ANISOU  900  OE1 GLU A  55     9865   9465  10928    -66  -2641  -1045
ATOM    901  OE2 GLU A  55      -9.319  62.283  53.822  0.00 82.53           O1-
ANISOU  901  OE2 GLU A  55     9833   9689  11836    -52  -2910  -1262
ATOM    902  H   GLU A  55      -5.345  61.187  56.980  1.00  0.00           H  
ATOM    903  HA  GLU A  55      -7.338  62.612  55.385  1.00  0.00           H  
ATOM    904  HB3 GLU A  55      -7.002  59.643  55.975  1.00  0.00           H  
ATOM    905  HB2 GLU A  55      -6.318  60.469  54.610  1.00  0.00           H  
ATOM    906  HG3 GLU A  55      -9.302  60.005  55.094  1.00  0.00           H  
ATOM    907  HG2 GLU A  55      -8.288  59.212  53.929  1.00  0.00           H  
ATOM    908  N   GLY A  56      -9.512  62.226  56.691  1.00 75.72           N  
ANISOU  908  N   GLY A  56     8686   8838  11247   -431  -2012   -726
ATOM    909  CA  GLY A  56     -10.643  62.673  57.507  1.00 77.24           C  
ANISOU  909  CA  GLY A  56     8632   8935  11780   -486  -1917   -709
ATOM    910  C   GLY A  56     -10.398  64.079  58.085  1.00 75.68           C  
ANISOU  910  C   GLY A  56     8548   8841  11366   -457  -1788   -536
ATOM    911  O   GLY A  56      -9.344  64.684  57.880  1.00 74.66           O  
ANISOU  911  O   GLY A  56     8671   8847  10848   -391  -1795   -444
ATOM    912  H   GLY A  56      -9.603  62.327  55.689  1.00  0.00           H  
ATOM    913  HA3 GLY A  56     -10.833  61.968  58.319  1.00  0.00           H  
ATOM    914  HA2 GLY A  56     -11.536  62.692  56.882  1.00  0.00           H  
ATOM    915  N   THR A  57     -11.407  64.599  58.800  1.00 76.14           N  
ANISOU  915  N   THR A  57     8412   8816  11701   -502  -1657   -492
ATOM    916  CA  THR A  57     -11.410  65.930  59.414  1.00 74.84           C  
ANISOU  916  CA  THR A  57     8328   8726  11380   -479  -1522   -334
ATOM    917  C   THR A  57     -11.411  65.823  60.953  1.00 73.63           C  
ANISOU  917  C   THR A  57     8143   8517  11314   -573  -1160   -168
ATOM    918  O   THR A  57     -11.752  64.777  61.509  1.00 74.37           O  
ANISOU  918  O   THR A  57     8125   8494  11637   -649  -1002   -174
ATOM    919  CB  THR A  57     -12.677  66.724  58.988  1.00 76.59           C  
ANISOU  919  CB  THR A  57     8386   8904  11810   -408  -1692   -420
ATOM    920  OG1 THR A  57     -13.876  66.126  59.453  1.00 78.88           O  
ANISOU  920  OG1 THR A  57     8359   9010  12601   -478  -1622   -497
ATOM    921  CG2 THR A  57     -12.778  66.935  57.470  1.00 78.69           C  
ANISOU  921  CG2 THR A  57     8727   9223  11950   -265  -2074   -594
ATOM    922  H   THR A  57     -12.247  64.057  58.946  1.00  0.00           H  
ATOM    923  HA  THR A  57     -10.527  66.498  59.115  1.00  0.00           H  
ATOM    924  HB  THR A  57     -12.632  67.714  59.441  1.00  0.00           H  
ATOM    925  HG1 THR A  57     -13.859  66.101  60.413  1.00  0.00           H  
ATOM    926 HG21 THR A  57     -13.640  67.554  57.219  1.00  0.00           H  
ATOM    927 HG22 THR A  57     -11.891  67.441  57.088  1.00  0.00           H  
ATOM    928 HG23 THR A  57     -12.881  65.991  56.934  1.00  0.00           H  
ATOM    929  N   GLY A  58     -11.028  66.932  61.607  1.00 70.77           N  
ANISOU  929  N   GLY A  58     7901   8228  10759   -548  -1030    -22
ATOM    930  CA  GLY A  58     -10.851  67.024  63.053  1.00 67.98           C  
ANISOU  930  CA  GLY A  58     7569   7827  10433   -588   -713    132
ATOM    931  C   GLY A  58      -9.493  66.424  63.436  1.00 65.54           C  
ANISOU  931  C   GLY A  58     7439   7563   9901   -620   -573    208
ATOM    932  O   GLY A  58      -8.547  66.453  62.647  1.00 65.91           O  
ANISOU  932  O   GLY A  58     7633   7715   9694   -611   -701    183
ATOM    933  H   GLY A  58     -10.716  67.730  61.068  1.00  0.00           H  
ATOM    934  HA3 GLY A  58     -11.664  66.518  63.577  1.00  0.00           H  
ATOM    935  HA2 GLY A  58     -10.873  68.073  63.349  1.00  0.00           H  
ATOM    936  N   ILE A  59      -9.405  65.897  64.667  1.00 61.80           N  
ANISOU  936  N   ILE A  59     6964   6998   9520   -639   -299    304
ATOM    937  CA  ILE A  59      -8.236  65.167  65.150  1.00 59.90           C  
ANISOU  937  CA  ILE A  59     6884   6777   9099   -651   -160    366
ATOM    938  C   ILE A  59      -8.767  63.874  65.797  1.00 57.67           C  
ANISOU  938  C   ILE A  59     6472   6327   9114   -690     28    357
ATOM    939  O   ILE A  59      -9.222  63.888  66.942  1.00 56.37           O  
ANISOU  939  O   ILE A  59     6274   6040   9105   -660    285    449
ATOM    940  CB  ILE A  59      -7.378  65.967  66.184  1.00 59.55           C  
ANISOU  940  CB  ILE A  59     7039   6783   8805   -587     -4    502
ATOM    941  CG1 ILE A  59      -7.132  67.438  65.767  1.00 60.45           C  
ANISOU  941  CG1 ILE A  59     7192   6983   8794   -546   -112    526
ATOM    942  CG2 ILE A  59      -6.027  65.258  66.423  1.00 64.41           C  
ANISOU  942  CG2 ILE A  59     7840   7486   9148   -586    -21    516
ATOM    943  CD1 ILE A  59      -6.389  68.272  66.823  1.00 64.71           C  
ANISOU  943  CD1 ILE A  59     7914   7561   9112   -478     -3    626
ATOM    944  H   ILE A  59     -10.204  65.910  65.285  1.00  0.00           H  
ATOM    945  HA  ILE A  59      -7.589  64.882  64.318  1.00  0.00           H  
ATOM    946  HB  ILE A  59      -7.907  66.000  67.138  1.00  0.00           H  
ATOM    947 HG13 ILE A  59      -8.079  67.939  65.567  1.00  0.00           H  
ATOM    948 HG12 ILE A  59      -6.576  67.463  64.829  1.00  0.00           H  
ATOM    949 HG21 ILE A  59      -5.481  65.698  67.257  1.00  0.00           H  
ATOM    950 HG22 ILE A  59      -6.155  64.201  66.647  1.00  0.00           H  
ATOM    951 HG23 ILE A  59      -5.389  65.319  65.540  1.00  0.00           H  
ATOM    952 HD11 ILE A  59      -6.635  69.329  66.725  1.00  0.00           H  
ATOM    953 HD12 ILE A  59      -6.650  67.966  67.836  1.00  0.00           H  
ATOM    954 HD13 ILE A  59      -5.309  68.174  66.709  1.00  0.00           H  
ATOM    955  N   SER A  60      -8.724  62.779  65.021  1.00 55.91           N  
ANISOU  955  N   SER A  60     6176   6082   8987   -746    -89    245
ATOM    956  CA  SER A  60      -9.081  61.418  65.434  1.00 54.81           C  
ANISOU  956  CA  SER A  60     5904   5768   9153   -792     88    224
ATOM    957  C   SER A  60      -8.089  60.831  66.461  1.00 53.26           C  
ANISOU  957  C   SER A  60     5909   5571   8755   -764    325    344
ATOM    958  O   SER A  60      -7.043  61.429  66.708  1.00 49.90           O  
ANISOU  958  O   SER A  60     5703   5285   7971   -717    299    411
ATOM    959  CB  SER A  60      -9.178  60.554  64.158  1.00 54.24           C  
ANISOU  959  CB  SER A  60     5702   5673   9235   -850   -146     46
ATOM    960  OG  SER A  60      -7.908  60.351  63.568  1.00 51.33           O  
ANISOU  960  OG  SER A  60     5530   5443   8531   -849   -267     31
ATOM    961  H   SER A  60      -8.350  62.856  64.086  1.00  0.00           H  
ATOM    962  HA  SER A  60     -10.067  61.458  65.902  1.00  0.00           H  
ATOM    963  HB3 SER A  60      -9.842  61.017  63.427  1.00  0.00           H  
ATOM    964  HB2 SER A  60      -9.606  59.579  64.391  1.00  0.00           H  
ATOM    965  HG  SER A  60      -8.001  59.754  62.819  1.00  0.00           H  
ATOM    966  N   MET A  61      -8.411  59.650  67.019  1.00 53.39           N  
ANISOU  966  N   MET A  61     5847   5417   9021   -783    552    363
ATOM    967  CA  MET A  61      -7.525  58.913  67.931  1.00 53.76           C  
ANISOU  967  CA  MET A  61     6097   5443   8887   -730    785    473
ATOM    968  C   MET A  61      -6.200  58.478  67.269  1.00 50.87           C  
ANISOU  968  C   MET A  61     5887   5237   8202   -750    595    424
ATOM    969  O   MET A  61      -5.163  58.508  67.932  1.00 47.37           O  
ANISOU  969  O   MET A  61     5668   4889   7441   -681    637    503
ATOM    970  CB  MET A  61      -8.300  57.735  68.566  1.00 57.53           C  
ANISOU  970  CB  MET A  61     6451   5685   9722   -745   1074    498
ATOM    971  CG  MET A  61      -7.579  57.027  69.733  1.00 59.34           C  
ANISOU  971  CG  MET A  61     6918   5859   9771   -640   1377    642
ATOM    972  SD  MET A  61      -6.431  55.683  69.312  1.00 63.80           S  
ANISOU  972  SD  MET A  61     7557   6436  10249   -686   1348    587
ATOM    973  CE  MET A  61      -7.599  54.353  68.938  1.00 54.30           C  
ANISOU  973  CE  MET A  61     6065   4936   9632   -764   1581    545
ATOM    974  H   MET A  61      -9.288  59.206  66.788  1.00  0.00           H  
ATOM    975  HA  MET A  61      -7.268  59.605  68.736  1.00  0.00           H  
ATOM    976  HB3 MET A  61      -8.546  57.007  67.792  1.00  0.00           H  
ATOM    977  HB2 MET A  61      -9.260  58.101  68.935  1.00  0.00           H  
ATOM    978  HG3 MET A  61      -8.325  56.611  70.411  1.00  0.00           H  
ATOM    979  HG2 MET A  61      -7.031  57.763  70.321  1.00  0.00           H  
ATOM    980  HE1 MET A  61      -7.062  53.439  68.682  1.00  0.00           H  
ATOM    981  HE2 MET A  61      -8.223  54.153  69.810  1.00  0.00           H  
ATOM    982  HE3 MET A  61      -8.241  54.623  68.100  1.00  0.00           H  
ATOM    983  N   SER A  62      -6.246  58.141  65.975  1.00 49.06           N  
ANISOU  983  N   SER A  62     5543   5032   8067   -832    372    284
ATOM    984  CA  SER A  62      -5.066  57.843  65.176  1.00 49.26           C  
ANISOU  984  CA  SER A  62     5708   5195   7813   -847    200    236
ATOM    985  C   SER A  62      -4.213  59.093  64.909  1.00 46.51           C  
ANISOU  985  C   SER A  62     5516   5031   7124   -805     43    267
ATOM    986  O   SER A  62      -2.995  59.018  65.077  1.00 48.10           O  
ANISOU  986  O   SER A  62     5889   5324   7064   -781     44    306
ATOM    987  CB  SER A  62      -5.502  57.075  63.912  1.00 53.57           C  
ANISOU  987  CB  SER A  62     6113   5714   8527   -913    -20     69
ATOM    988  OG  SER A  62      -6.591  57.702  63.251  1.00 59.86           O  
ANISOU  988  OG  SER A  62     6774   6524   9445   -912   -237    -27
ATOM    989  H   SER A  62      -7.100  58.208  65.438  1.00  0.00           H  
ATOM    990  HA  SER A  62      -4.429  57.174  65.752  1.00  0.00           H  
ATOM    991  HB3 SER A  62      -5.801  56.061  64.181  1.00  0.00           H  
ATOM    992  HB2 SER A  62      -4.663  56.977  63.221  1.00  0.00           H  
ATOM    993  HG  SER A  62      -6.784  57.198  62.453  1.00  0.00           H  
ATOM    994  N   ALA A  63      -4.854  60.234  64.608  1.00 45.81           N  
ANISOU  994  N   ALA A  63     5360   4982   7065   -793    -81    247
ATOM    995  CA  ALA A  63      -4.175  61.518  64.430  1.00 43.85           C  
ANISOU  995  CA  ALA A  63     5246   4879   6535   -750   -192    288
ATOM    996  C   ALA A  63      -3.514  62.020  65.726  1.00 40.72           C  
ANISOU  996  C   ALA A  63     4997   4501   5972   -691    -21    410
ATOM    997  O   ALA A  63      -2.391  62.514  65.660  1.00 38.49           O  
ANISOU  997  O   ALA A  63     4855   4318   5453   -666    -75    433
ATOM    998  CB  ALA A  63      -5.168  62.555  63.885  1.00 42.43           C  
ANISOU  998  CB  ALA A  63     4964   4717   6441   -735   -337    249
ATOM    999  H   ALA A  63      -5.864  60.257  64.592  1.00  0.00           H  
ATOM   1000  HA  ALA A  63      -3.391  61.382  63.682  1.00  0.00           H  
ATOM   1001  HB1 ALA A  63      -4.667  63.493  63.644  1.00  0.00           H  
ATOM   1002  HB2 ALA A  63      -5.652  62.197  62.976  1.00  0.00           H  
ATOM   1003  HB3 ALA A  63      -5.953  62.775  64.607  1.00  0.00           H  
ATOM   1004  N   CYS A  64      -4.198  61.840  66.873  1.00 41.73           N  
ANISOU 1004  N   CYS A  64     5097   4519   6240   -652    187    479
ATOM   1005  CA ACYS A  64      -3.719  62.169  68.219  0.50 41.84           C  
ANISOU 1005  CA ACYS A  64     5281   4534   6083   -553    337    581
ATOM   1006  CA BCYS A  64      -3.707  62.231  68.080  0.50 41.11           C  
ANISOU 1006  CA BCYS A  64     5187   4440   5992   -553    339    581
ATOM   1007  C   CYS A  64      -2.444  61.392  68.578  1.00 39.73           C  
ANISOU 1007  C   CYS A  64     5175   4291   5630   -516    383    594
ATOM   1008  O   CYS A  64      -1.453  62.021  68.940  1.00 36.35           O  
ANISOU 1008  O   CYS A  64     4890   3944   4979   -458    320    609
ATOM   1009  CB ACYS A  64      -4.779  61.915  69.315  0.50 43.27           C  
ANISOU 1009  CB ACYS A  64     5429   4566   6447   -489    586    662
ATOM   1010  CB BCYS A  64      -4.752  62.087  69.184  0.50 42.21           C  
ANISOU 1010  CB BCYS A  64     5294   4427   6319   -490    594    662
ATOM   1011  SG ACYS A  64      -6.093  63.162  69.286  0.50 51.16           S  
ANISOU 1011  SG ACYS A  64     6280   5551   7608   -496    539    666
ATOM   1012  SG BCYS A  64      -4.226  62.809  70.747  0.50 44.90           S  
ANISOU 1012  SG BCYS A  64     5885   4760   6416   -315    749    774
ATOM   1013  H   CYS A  64      -5.127  61.440  66.825  1.00  0.00           H  
ATOM   1014  HA ACYS A  64      -3.465  63.231  68.224  0.50  0.00           H  
ATOM   1015  HA BCYS A  64      -3.448  63.286  67.991  0.50  0.00           H  
ATOM   1016  HB3ACYS A  64      -4.327  61.954  70.307  0.50  0.00           H  
ATOM   1017  HB3BCYS A  64      -4.980  61.031  69.331  0.50  0.00           H  
ATOM   1018  HB2ACYS A  64      -5.224  60.926  69.209  0.50  0.00           H  
ATOM   1019  HB2BCYS A  64      -5.683  62.555  68.864  0.50  0.00           H  
ATOM   1020  HG ACYS A  64      -6.645  62.752  68.139  0.50  0.00           H  
ATOM   1021  HG BCYS A  64      -5.187  62.645  71.660  0.50  0.00           H  
ATOM   1022  N   ARG A  65      -2.493  60.052  68.457  1.00 39.10           N  
ANISOU 1022  N   ARG A  65     5059   4130   5666   -548    482    579
ATOM   1023  CA  ARG A  65      -1.372  59.160  68.760  1.00 41.22           C  
ANISOU 1023  CA  ARG A  65     5477   4411   5772   -506    534    591
ATOM   1024  C   ARG A  65      -0.197  59.288  67.780  1.00 39.39           C  
ANISOU 1024  C   ARG A  65     5290   4316   5358   -552    324    528
ATOM   1025  O   ARG A  65       0.941  59.143  68.225  1.00 38.87           O  
ANISOU 1025  O   ARG A  65     5368   4296   5106   -487    315    541
ATOM   1026  CB  ARG A  65      -1.859  57.701  68.840  1.00 42.81           C  
ANISOU 1026  CB  ARG A  65     5621   4482   6164   -534    701    590
ATOM   1027  CG  ARG A  65      -2.691  57.411  70.104  1.00 49.41           C  
ANISOU 1027  CG  ARG A  65     6507   5154   7114   -430   1005    695
ATOM   1028  CD  ARG A  65      -2.974  55.916  70.317  1.00 55.21           C  
ANISOU 1028  CD  ARG A  65     7202   5738   8038   -446   1208    707
ATOM   1029  NE  ARG A  65      -1.749  55.158  70.613  1.00 58.12           N  
ANISOU 1029  NE  ARG A  65     7745   6157   8183   -397   1204    708
ATOM   1030  CZ  ARG A  65      -1.157  55.023  71.810  1.00 60.18           C  
ANISOU 1030  CZ  ARG A  65     8240   6378   8249   -229   1373    794
ATOM   1031  NH1 ARG A  65      -0.002  54.351  71.893  1.00 62.56           N  
ANISOU 1031  NH1 ARG A  65     8669   6731   8371   -198   1327    772
ATOM   1032  NH2 ARG A  65      -1.696  55.548  72.918  1.00 58.71           N1+
ANISOU 1032  NH2 ARG A  65     8180   6094   8031    -71   1585    899
ATOM   1033  H   ARG A  65      -3.347  59.608  68.147  1.00  0.00           H  
ATOM   1034  HA  ARG A  65      -0.993  59.443  69.743  1.00  0.00           H  
ATOM   1035  HB3 ARG A  65      -0.987  57.046  68.852  1.00  0.00           H  
ATOM   1036  HB2 ARG A  65      -2.421  57.437  67.943  1.00  0.00           H  
ATOM   1037  HG3 ARG A  65      -3.608  57.999  70.161  1.00  0.00           H  
ATOM   1038  HG2 ARG A  65      -2.078  57.739  70.944  1.00  0.00           H  
ATOM   1039  HD3 ARG A  65      -3.280  55.515  69.352  1.00  0.00           H  
ATOM   1040  HD2 ARG A  65      -3.803  55.719  70.997  1.00  0.00           H  
ATOM   1041  HE  ARG A  65      -1.269  54.799  69.795  1.00  0.00           H  
ATOM   1042 HH12 ARG A  65       0.462  54.239  72.783  1.00  0.00           H  
ATOM   1043 HH11 ARG A  65       0.425  53.964  71.064  1.00  0.00           H  
ATOM   1044 HH22 ARG A  65      -1.242  55.445  73.814  1.00  0.00           H  
ATOM   1045 HH21 ARG A  65      -2.567  56.058  72.861  1.00  0.00           H  
ATOM   1046  N   GLU A  66      -0.474  59.574  66.501  1.00 40.00           N  
ANISOU 1046  N   GLU A  66     5253   4447   5497   -645    156    456
ATOM   1047  CA  GLU A  66       0.550  59.835  65.495  1.00 39.32           C  
ANISOU 1047  CA  GLU A  66     5222   4473   5246   -673     -9    414
ATOM   1048  C   GLU A  66       1.365  61.097  65.828  1.00 38.30           C  
ANISOU 1048  C   GLU A  66     5174   4419   4958   -623    -67    448
ATOM   1049  O   GLU A  66       2.586  61.016  65.967  1.00 38.40           O  
ANISOU 1049  O   GLU A  66     5273   4478   4840   -603   -100    444
ATOM   1050  CB  GLU A  66      -0.105  59.857  64.096  1.00 39.48           C  
ANISOU 1050  CB  GLU A  66     5143   4519   5340   -736   -170    334
ATOM   1051  CG  GLU A  66       0.841  60.214  62.934  1.00 44.73           C  
ANISOU 1051  CG  GLU A  66     5890   5283   5823   -734   -306    313
ATOM   1052  CD  GLU A  66       0.203  60.057  61.557  1.00 50.47           C  
ANISOU 1052  CD  GLU A  66     6581   6019   6576   -751   -460    226
ATOM   1053  OE1 GLU A  66      -1.015  60.311  61.435  1.00 59.53           O  
ANISOU 1053  OE1 GLU A  66     7612   7097   7909   -777   -501    155
ATOM   1054  OE2 GLU A  66       0.960  59.698  60.631  1.00 54.39           O1-
ANISOU 1054  OE2 GLU A  66     7171   6578   6915   -724   -538    223
ATOM   1055  H   GLU A  66      -1.436  59.627  66.181  1.00  0.00           H  
ATOM   1056  HA  GLU A  66       1.253  59.003  65.522  1.00  0.00           H  
ATOM   1057  HB3 GLU A  66      -0.938  60.561  64.098  1.00  0.00           H  
ATOM   1058  HB2 GLU A  66      -0.542  58.877  63.900  1.00  0.00           H  
ATOM   1059  HG3 GLU A  66       1.733  59.588  62.977  1.00  0.00           H  
ATOM   1060  HG2 GLU A  66       1.170  61.248  63.023  1.00  0.00           H  
ATOM   1061  N   ILE A  67       0.660  62.220  66.023  1.00 38.05           N  
ANISOU 1061  N   ILE A  67     5102   4387   4969   -604    -78    472
ATOM   1062  CA  ILE A  67       1.245  63.510  66.398  1.00 36.85           C  
ANISOU 1062  CA  ILE A  67     5015   4282   4705   -553   -123    499
ATOM   1063  C   ILE A  67       2.020  63.438  67.728  1.00 35.36           C  
ANISOU 1063  C   ILE A  67     4951   4064   4422   -457    -44    523
ATOM   1064  O   ILE A  67       3.150  63.920  67.775  1.00 34.65           O  
ANISOU 1064  O   ILE A  67     4920   4009   4236   -426   -117    501
ATOM   1065  CB  ILE A  67       0.164  64.634  66.474  1.00 38.92           C  
ANISOU 1065  CB  ILE A  67     5214   4537   5037   -542   -136    524
ATOM   1066  CG1 ILE A  67      -0.392  64.959  65.068  1.00 41.15           C  
ANISOU 1066  CG1 ILE A  67     5406   4860   5371   -600   -264    485
ATOM   1067  CG2 ILE A  67       0.616  65.947  67.159  1.00 33.43           C  
ANISOU 1067  CG2 ILE A  67     4593   3870   4241   -481   -168    547
ATOM   1068  CD1 ILE A  67      -1.758  65.665  65.088  1.00 43.24           C  
ANISOU 1068  CD1 ILE A  67     5584   5105   5740   -588   -279    498
ATOM   1069  H   ILE A  67      -0.350  62.191  65.971  1.00  0.00           H  
ATOM   1070  HA  ILE A  67       1.959  63.779  65.617  1.00  0.00           H  
ATOM   1071  HB  ILE A  67      -0.662  64.236  67.066  1.00  0.00           H  
ATOM   1072 HG13 ILE A  67      -0.491  64.048  64.476  1.00  0.00           H  
ATOM   1073 HG12 ILE A  67       0.329  65.574  64.530  1.00  0.00           H  
ATOM   1074 HG21 ILE A  67      -0.160  66.711  67.106  1.00  0.00           H  
ATOM   1075 HG22 ILE A  67       0.837  65.811  68.218  1.00  0.00           H  
ATOM   1076 HG23 ILE A  67       1.507  66.354  66.679  1.00  0.00           H  
ATOM   1077 HD11 ILE A  67      -2.471  65.146  64.447  1.00  0.00           H  
ATOM   1078 HD12 ILE A  67      -2.194  65.699  66.087  1.00  0.00           H  
ATOM   1079 HD13 ILE A  67      -1.673  66.691  64.730  1.00  0.00           H  
ATOM   1080  N   ALA A  68       1.415  62.820  68.758  1.00 36.40           N  
ANISOU 1080  N   ALA A  68     5122   4112   4595   -394    108    562
ATOM   1081  CA  ALA A  68       1.976  62.692  70.104  1.00 36.82           C  
ANISOU 1081  CA  ALA A  68     5341   4124   4527   -250    186    584
ATOM   1082  C   ALA A  68       3.283  61.888  70.169  1.00 37.70           C  
ANISOU 1082  C   ALA A  68     5531   4264   4529   -228    128    538
ATOM   1083  O   ALA A  68       4.189  62.301  70.889  1.00 36.33           O  
ANISOU 1083  O   ALA A  68     5458   4103   4241   -129     48    504
ATOM   1084  CB  ALA A  68       0.927  62.080  71.045  1.00 35.50           C  
ANISOU 1084  CB  ALA A  68     5223   3838   4427   -170    411    654
ATOM   1085  H   ALA A  68       0.482  62.447  68.633  1.00  0.00           H  
ATOM   1086  HA  ALA A  68       2.195  63.701  70.459  1.00  0.00           H  
ATOM   1087  HB1 ALA A  68       1.319  61.970  72.057  1.00  0.00           H  
ATOM   1088  HB2 ALA A  68       0.042  62.713  71.109  1.00  0.00           H  
ATOM   1089  HB3 ALA A  68       0.610  61.094  70.703  1.00  0.00           H  
ATOM   1090  N   LEU A  69       3.364  60.774  69.422  1.00 37.84           N  
ANISOU 1090  N   LEU A  69     5496   4283   4600   -313    155    526
ATOM   1091  CA  LEU A  69       4.542  59.906  69.405  1.00 36.36           C  
ANISOU 1091  CA  LEU A  69     5376   4117   4324   -296    118    488
ATOM   1092  C   LEU A  69       5.651  60.441  68.485  1.00 35.22           C  
ANISOU 1092  C   LEU A  69     5179   4053   4149   -361    -45    435
ATOM   1093  O   LEU A  69       6.807  60.409  68.900  1.00 33.78           O  
ANISOU 1093  O   LEU A  69     5058   3880   3898   -296   -112    395
ATOM   1094  CB  LEU A  69       4.130  58.455  69.074  1.00 36.79           C  
ANISOU 1094  CB  LEU A  69     5404   4126   4449   -351    226    497
ATOM   1095  CG  LEU A  69       3.350  57.769  70.222  1.00 40.61           C  
ANISOU 1095  CG  LEU A  69     5962   4492   4977   -256    442    563
ATOM   1096  CD1 LEU A  69       2.697  56.459  69.760  1.00 42.48           C  
ANISOU 1096  CD1 LEU A  69     6139   4658   5344   -327    562    566
ATOM   1097  CD2 LEU A  69       4.222  57.534  71.472  1.00 38.73           C  
ANISOU 1097  CD2 LEU A  69     5934   4222   4558    -60    491    582
ATOM   1098  H   LEU A  69       2.579  60.485  68.853  1.00  0.00           H  
ATOM   1099  HA  LEU A  69       4.970  59.904  70.408  1.00  0.00           H  
ATOM   1100  HB3 LEU A  69       5.011  57.854  68.854  1.00  0.00           H  
ATOM   1101  HB2 LEU A  69       3.537  58.453  68.158  1.00  0.00           H  
ATOM   1102  HG  LEU A  69       2.530  58.428  70.510  1.00  0.00           H  
ATOM   1103 HD11 LEU A  69       2.073  56.036  70.547  1.00  0.00           H  
ATOM   1104 HD12 LEU A  69       2.055  56.623  68.895  1.00  0.00           H  
ATOM   1105 HD13 LEU A  69       3.450  55.716  69.495  1.00  0.00           H  
ATOM   1106 HD21 LEU A  69       4.161  56.506  71.829  1.00  0.00           H  
ATOM   1107 HD22 LEU A  69       5.277  57.739  71.284  1.00  0.00           H  
ATOM   1108 HD23 LEU A  69       3.905  58.180  72.292  1.00  0.00           H  
ATOM   1109  N   LEU A  70       5.312  60.995  67.309  1.00 37.92           N  
ANISOU 1109  N   LEU A  70     5415   4438   4555   -469   -104    432
ATOM   1110  CA  LEU A  70       6.298  61.608  66.403  1.00 39.19           C  
ANISOU 1110  CA  LEU A  70     5544   4650   4699   -512   -207    407
ATOM   1111  C   LEU A  70       6.932  62.899  66.954  1.00 40.91           C  
ANISOU 1111  C   LEU A  70     5772   4862   4908   -451   -272    391
ATOM   1112  O   LEU A  70       8.030  63.251  66.535  1.00 42.49           O  
ANISOU 1112  O   LEU A  70     5960   5061   5124   -448   -327    355
ATOM   1113  CB  LEU A  70       5.669  61.890  65.023  1.00 39.78           C  
ANISOU 1113  CB  LEU A  70     5546   4756   4811   -592   -246    416
ATOM   1114  CG  LEU A  70       5.532  60.649  64.123  1.00 41.53           C  
ANISOU 1114  CG  LEU A  70     5754   4982   5044   -647   -244    395
ATOM   1115  CD1 LEU A  70       4.696  60.976  62.869  1.00 43.00           C  
ANISOU 1115  CD1 LEU A  70     5899   5192   5245   -676   -320    386
ATOM   1116  CD2 LEU A  70       6.910  60.052  63.751  1.00 44.25           C  
ANISOU 1116  CD2 LEU A  70     6146   5338   5328   -651   -240    379
ATOM   1117  H   LEU A  70       4.342  61.000  67.000  1.00  0.00           H  
ATOM   1118  HA  LEU A  70       7.123  60.905  66.282  1.00  0.00           H  
ATOM   1119  HB3 LEU A  70       6.281  62.613  64.487  1.00  0.00           H  
ATOM   1120  HB2 LEU A  70       4.701  62.374  65.161  1.00  0.00           H  
ATOM   1121  HG  LEU A  70       4.980  59.902  64.692  1.00  0.00           H  
ATOM   1122 HD11 LEU A  70       5.207  60.725  61.941  1.00  0.00           H  
ATOM   1123 HD12 LEU A  70       3.766  60.412  62.875  1.00  0.00           H  
ATOM   1124 HD13 LEU A  70       4.426  62.031  62.814  1.00  0.00           H  
ATOM   1125 HD21 LEU A  70       6.947  59.662  62.733  1.00  0.00           H  
ATOM   1126 HD22 LEU A  70       7.712  60.786  63.836  1.00  0.00           H  
ATOM   1127 HD23 LEU A  70       7.169  59.225  64.412  1.00  0.00           H  
ATOM   1128  N   ARG A  71       6.245  63.582  67.876  1.00 40.50           N  
ANISOU 1128  N   ARG A  71     5738   4792   4860   -399   -260    410
ATOM   1129  CA  ARG A  71       6.743  64.762  68.584  1.00 40.26           C  
ANISOU 1129  CA  ARG A  71     5732   4741   4824   -321   -334    378
ATOM   1130  C   ARG A  71       7.908  64.449  69.547  1.00 39.65           C  
ANISOU 1130  C   ARG A  71     5735   4630   4702   -210   -398    307
ATOM   1131  O   ARG A  71       8.727  65.337  69.784  1.00 40.52           O  
ANISOU 1131  O   ARG A  71     5823   4714   4857   -167   -507    241
ATOM   1132  CB  ARG A  71       5.549  65.433  69.303  1.00 40.95           C  
ANISOU 1132  CB  ARG A  71     5854   4806   4900   -261   -292    417
ATOM   1133  CG  ARG A  71       5.843  66.753  70.035  1.00 44.98           C  
ANISOU 1133  CG  ARG A  71     6388   5293   5408   -182   -378    381
ATOM   1134  CD  ARG A  71       6.079  67.926  69.071  1.00 43.12           C  
ANISOU 1134  CD  ARG A  71     6041   5082   5261   -278   -431    386
ATOM   1135  NE  ARG A  71       6.538  69.133  69.767  1.00 45.03           N  
ANISOU 1135  NE  ARG A  71     6288   5284   5539   -213   -520    334
ATOM   1136  CZ  ARG A  71       7.794  69.359  70.188  1.00 52.06           C  
ANISOU 1136  CZ  ARG A  71     7165   6129   6485   -169   -624    243
ATOM   1137  NH1 ARG A  71       8.080  70.518  70.794  1.00 50.83           N  
ANISOU 1137  NH1 ARG A  71     6997   5919   6395   -109   -720    179
ATOM   1138  NH2 ARG A  71       8.765  68.449  70.017  1.00 51.33           N1+
ANISOU 1138  NH2 ARG A  71     7063   6034   6405   -180   -641    202
ATOM   1139  H   ARG A  71       5.315  63.276  68.131  1.00  0.00           H  
ATOM   1140  HA  ARG A  71       7.124  65.448  67.826  1.00  0.00           H  
ATOM   1141  HB3 ARG A  71       5.127  64.728  70.021  1.00  0.00           H  
ATOM   1142  HB2 ARG A  71       4.764  65.633  68.575  1.00  0.00           H  
ATOM   1143  HG3 ARG A  71       6.609  66.674  70.806  1.00  0.00           H  
ATOM   1144  HG2 ARG A  71       4.921  66.979  70.573  1.00  0.00           H  
ATOM   1145  HD3 ARG A  71       5.099  68.226  68.697  1.00  0.00           H  
ATOM   1146  HD2 ARG A  71       6.669  67.675  68.189  1.00  0.00           H  
ATOM   1147  HE  ARG A  71       5.828  69.822  69.970  1.00  0.00           H  
ATOM   1148 HH12 ARG A  71       9.016  70.703  71.124  1.00  0.00           H  
ATOM   1149 HH11 ARG A  71       7.362  71.212  70.935  1.00  0.00           H  
ATOM   1150 HH22 ARG A  71       9.703  68.628  70.342  1.00  0.00           H  
ATOM   1151 HH21 ARG A  71       8.551  67.547  69.612  1.00  0.00           H  
ATOM   1152  N   GLU A  72       7.960  63.207  70.062  1.00 39.52           N  
ANISOU 1152  N   GLU A  72     5805   4598   4611   -153   -337    309
ATOM   1153  CA  GLU A  72       8.938  62.749  71.051  1.00 39.91           C  
ANISOU 1153  CA  GLU A  72     5959   4613   4592    -13   -407    236
ATOM   1154  C   GLU A  72      10.040  61.866  70.438  1.00 41.57           C  
ANISOU 1154  C   GLU A  72     6123   4838   4836    -64   -442    194
ATOM   1155  O   GLU A  72      11.174  61.932  70.915  1.00 41.89           O  
ANISOU 1155  O   GLU A  72     6182   4848   4885     27   -559    102
ATOM   1156  CB  GLU A  72       8.204  61.981  72.175  1.00 39.44           C  
ANISOU 1156  CB  GLU A  72     6071   4509   4404    130   -290    278
ATOM   1157  CG  GLU A  72       7.074  62.764  72.880  1.00 40.47           C  
ANISOU 1157  CG  GLU A  72     6276   4603   4496    212   -211    334
ATOM   1158  CD  GLU A  72       7.529  64.080  73.512  1.00 39.39           C  
ANISOU 1158  CD  GLU A  72     6184   4450   4333    325   -363    261
ATOM   1159  OE1 GLU A  72       8.505  64.035  74.293  1.00 41.28           O  
ANISOU 1159  OE1 GLU A  72     6528   4659   4499    481   -499    163
ATOM   1160  OE2 GLU A  72       6.892  65.110  73.201  1.00 44.20           O1-
ANISOU 1160  OE2 GLU A  72     6726   5068   5000    270   -360    292
ATOM   1161  H   GLU A  72       7.251  62.537  69.801  1.00  0.00           H  
ATOM   1162  HA  GLU A  72       9.440  63.610  71.497  1.00  0.00           H  
ATOM   1163  HB3 GLU A  72       8.929  61.657  72.923  1.00  0.00           H  
ATOM   1164  HB2 GLU A  72       7.778  61.063  71.766  1.00  0.00           H  
ATOM   1165  HG3 GLU A  72       6.633  62.145  73.662  1.00  0.00           H  
ATOM   1166  HG2 GLU A  72       6.273  62.976  72.175  1.00  0.00           H  
ATOM   1167  N   LEU A  73       9.708  61.059  69.412  1.00 40.49           N  
ANISOU 1167  N   LEU A  73     5929   4735   4722   -191   -349    249
ATOM   1168  CA  LEU A  73      10.646  60.160  68.730  1.00 41.41           C  
ANISOU 1168  CA  LEU A  73     6025   4859   4848   -228   -350    224
ATOM   1169  C   LEU A  73      11.657  60.955  67.884  1.00 41.53           C  
ANISOU 1169  C   LEU A  73     5922   4872   4984   -293   -426    183
ATOM   1170  O   LEU A  73      11.251  61.747  67.032  1.00 43.89           O  
ANISOU 1170  O   LEU A  73     6144   5188   5347   -384   -404    224
ATOM   1171  CB  LEU A  73       9.872  59.152  67.847  1.00 41.17           C  
ANISOU 1171  CB  LEU A  73     5984   4853   4806   -330   -237    284
ATOM   1172  CG  LEU A  73       9.035  58.098  68.611  1.00 43.76           C  
ANISOU 1172  CG  LEU A  73     6401   5148   5079   -280   -117    326
ATOM   1173  CD1 LEU A  73       8.048  57.393  67.660  1.00 41.60           C  
ANISOU 1173  CD1 LEU A  73     6055   4881   4869   -404    -43    363
ATOM   1174  CD2 LEU A  73       9.898  57.070  69.365  1.00 36.86           C  
ANISOU 1174  CD2 LEU A  73     5642   4241   4123   -172    -87    303
ATOM   1175  H   LEU A  73       8.754  61.046  69.075  1.00  0.00           H  
ATOM   1176  HA  LEU A  73      11.197  59.609  69.492  1.00  0.00           H  
ATOM   1177  HB3 LEU A  73      10.566  58.628  67.188  1.00  0.00           H  
ATOM   1178  HB2 LEU A  73       9.212  59.718  67.186  1.00  0.00           H  
ATOM   1179  HG  LEU A  73       8.445  58.604  69.373  1.00  0.00           H  
ATOM   1180 HD11 LEU A  73       8.022  56.316  67.817  1.00  0.00           H  
ATOM   1181 HD12 LEU A  73       7.035  57.761  67.810  1.00  0.00           H  
ATOM   1182 HD13 LEU A  73       8.297  57.559  66.611  1.00  0.00           H  
ATOM   1183 HD21 LEU A  73       9.277  56.325  69.863  1.00  0.00           H  
ATOM   1184 HD22 LEU A  73      10.563  56.536  68.687  1.00  0.00           H  
ATOM   1185 HD23 LEU A  73      10.507  57.539  70.137  1.00  0.00           H  
ATOM   1186  N   LYS A  74      12.951  60.712  68.139  1.00 40.42           N  
ANISOU 1186  N   LYS A  74     5771   4697   4890   -229   -505    105
ATOM   1187  CA  LYS A  74      14.072  61.373  67.479  1.00 40.24           C  
ANISOU 1187  CA  LYS A  74     5613   4634   5040   -281   -547     63
ATOM   1188  C   LYS A  74      15.258  60.399  67.429  1.00 39.28           C  
ANISOU 1188  C   LYS A  74     5480   4493   4953   -261   -554     19
ATOM   1189  O   LYS A  74      15.904  60.167  68.451  1.00 39.57           O  
ANISOU 1189  O   LYS A  74     5554   4496   4986   -139   -665    -76
ATOM   1190  CB  LYS A  74      14.392  62.702  68.203  1.00 43.21           C  
ANISOU 1190  CB  LYS A  74     5928   4948   5541   -208   -684    -30
ATOM   1191  CG  LYS A  74      15.554  63.498  67.582  0.00 46.03           C  
ANISOU 1191  CG  LYS A  74     6112   5229   6149   -274   -693    -65
ATOM   1192  CD  LYS A  74      15.784  64.845  68.282  0.00 47.05           C  
ANISOU 1192  CD  LYS A  74     6166   5283   6430   -216   -827   -161
ATOM   1193  CE  LYS A  74      16.947  65.636  67.667  0.00 47.84           C  
ANISOU 1193  CE  LYS A  74     6065   5270   6840   -287   -799   -192
ATOM   1194  NZ  LYS A  74      17.150  66.918  68.361  0.00 48.84           N1+
ANISOU 1194  NZ  LYS A  74     6097   5303   7156   -238   -937   -301
ATOM   1195  H   LYS A  74      13.200  60.051  68.866  1.00  0.00           H  
ATOM   1196  HA  LYS A  74      13.787  61.608  66.451  1.00  0.00           H  
ATOM   1197  HB3 LYS A  74      14.612  62.504  69.253  1.00  0.00           H  
ATOM   1198  HB2 LYS A  74      13.499  63.329  68.198  1.00  0.00           H  
ATOM   1199  HG3 LYS A  74      15.351  63.667  66.523  1.00  0.00           H  
ATOM   1200  HG2 LYS A  74      16.475  62.916  67.629  1.00  0.00           H  
ATOM   1201  HD3 LYS A  74      15.977  64.672  69.341  1.00  0.00           H  
ATOM   1202  HD2 LYS A  74      14.870  65.439  68.229  1.00  0.00           H  
ATOM   1203  HE3 LYS A  74      16.755  65.834  66.611  1.00  0.00           H  
ATOM   1204  HE2 LYS A  74      17.870  65.057  67.723  1.00  0.00           H  
ATOM   1205  HZ1 LYS A  74      16.312  67.477  68.291  1.00  0.00           H  
ATOM   1206  HZ2 LYS A  74      17.358  66.746  69.335  1.00  0.00           H  
ATOM   1207  HZ3 LYS A  74      17.921  67.414  67.936  1.00  0.00           H  
ATOM   1208  N   HIS A  75      15.509  59.854  66.231  1.00 37.27           N  
ANISOU 1208  N   HIS A  75     5190   4255   4716   -362   -440     84
ATOM   1209  CA  HIS A  75      16.573  58.896  65.932  1.00 36.61           C  
ANISOU 1209  CA  HIS A  75     5089   4150   4672   -359   -417     60
ATOM   1210  C   HIS A  75      16.865  58.977  64.419  1.00 37.05           C  
ANISOU 1210  C   HIS A  75     5085   4193   4800   -460   -285    137
ATOM   1211  O   HIS A  75      15.912  59.149  63.659  1.00 35.57           O  
ANISOU 1211  O   HIS A  75     4940   4047   4526   -520   -213    216
ATOM   1212  CB  HIS A  75      16.097  57.490  66.355  1.00 34.97           C  
ANISOU 1212  CB  HIS A  75     5015   3990   4283   -324   -381     80
ATOM   1213  CG  HIS A  75      17.084  56.367  66.151  1.00 33.66           C  
ANISOU 1213  CG  HIS A  75     4850   3805   4135   -299   -369     48
ATOM   1214  ND1 HIS A  75      17.146  55.631  64.964  1.00 33.33           N  
ANISOU 1214  ND1 HIS A  75     4797   3773   4094   -384   -256    106
ATOM   1215  CD2 HIS A  75      18.035  55.882  67.025  1.00 31.94           C  
ANISOU 1215  CD2 HIS A  75     4660   3556   3919   -182   -461    -38
ATOM   1216  CE1 HIS A  75      18.120  54.752  65.159  1.00 34.44           C  
ANISOU 1216  CE1 HIS A  75     4942   3891   4254   -336   -265     65
ATOM   1217  NE2 HIS A  75      18.676  54.848  66.365  1.00 34.38           N  
ANISOU 1217  NE2 HIS A  75     4954   3859   4248   -213   -393    -25
ATOM   1218  H   HIS A  75      14.926  60.099  65.442  1.00  0.00           H  
ATOM   1219  HA  HIS A  75      17.441  59.171  66.527  1.00  0.00           H  
ATOM   1220  HB3 HIS A  75      15.170  57.230  65.840  1.00  0.00           H  
ATOM   1221  HB2 HIS A  75      15.860  57.511  67.416  1.00  0.00           H  
ATOM   1222  HD2 HIS A  75      18.292  56.174  68.032  1.00  0.00           H  
ATOM   1223  HE1 HIS A  75      18.426  54.025  64.422  1.00  0.00           H  
ATOM   1224  HE2 HIS A  75      19.417  54.255  66.721  1.00  0.00           H  
ATOM   1225  N   PRO A  76      18.147  58.843  63.990  1.00 38.31           N  
ANISOU 1225  N   PRO A  76     5155   4284   5119   -461   -252    111
ATOM   1226  CA  PRO A  76      18.523  58.852  62.558  1.00 39.80           C  
ANISOU 1226  CA  PRO A  76     5315   4436   5372   -525    -90    199
ATOM   1227  C   PRO A  76      17.771  57.893  61.614  1.00 39.17           C  
ANISOU 1227  C   PRO A  76     5373   4426   5082   -560      8    285
ATOM   1228  O   PRO A  76      17.629  58.236  60.442  1.00 41.21           O  
ANISOU 1228  O   PRO A  76     5666   4671   5320   -582    117    365
ATOM   1229  CB  PRO A  76      20.028  58.536  62.564  1.00 42.42           C  
ANISOU 1229  CB  PRO A  76     5533   4673   5910   -501    -68    147
ATOM   1230  CG  PRO A  76      20.512  59.049  63.905  1.00 43.91           C  
ANISOU 1230  CG  PRO A  76     5630   4822   6234   -432   -255     10
ATOM   1231  CD  PRO A  76      19.344  58.745  64.832  1.00 39.18           C  
ANISOU 1231  CD  PRO A  76     5177   4324   5387   -384   -364     -7
ATOM   1232  HA  PRO A  76      18.377  59.874  62.204  1.00  0.00           H  
ATOM   1233  HB3 PRO A  76      20.560  58.996  61.730  1.00  0.00           H  
ATOM   1234  HB2 PRO A  76      20.197  57.459  62.509  1.00  0.00           H  
ATOM   1235  HG3 PRO A  76      20.658  60.129  63.846  1.00  0.00           H  
ATOM   1236  HG2 PRO A  76      21.451  58.599  64.229  1.00  0.00           H  
ATOM   1237  HD2 PRO A  76      19.425  57.730  65.222  1.00  0.00           H  
ATOM   1238  HD3 PRO A  76      19.357  59.442  65.669  1.00  0.00           H  
ATOM   1239  N   ASN A  77      17.307  56.737  62.122  1.00 36.65           N  
ANISOU 1239  N   ASN A  77     5141   4167   4617   -547    -34    261
ATOM   1240  CA  ASN A  77      16.622  55.707  61.332  1.00 38.15           C  
ANISOU 1240  CA  ASN A  77     5447   4409   4641   -577     25    309
ATOM   1241  C   ASN A  77      15.120  55.595  61.635  1.00 38.80           C  
ANISOU 1241  C   ASN A  77     5590   4553   4601   -599    -26    315
ATOM   1242  O   ASN A  77      14.514  54.585  61.282  1.00 37.81           O  
ANISOU 1242  O   ASN A  77     5537   4454   4376   -619    -10    321
ATOM   1243  CB  ASN A  77      17.348  54.343  61.424  1.00 38.55           C  
ANISOU 1243  CB  ASN A  77     5538   4460   4650   -556     41    281
ATOM   1244  CG  ASN A  77      18.830  54.402  61.044  1.00 38.44           C  
ANISOU 1244  CG  ASN A  77     5454   4377   4776   -536    105    278
ATOM   1245  OD1 ASN A  77      19.689  53.978  61.812  1.00 37.06           O  
ANISOU 1245  OD1 ASN A  77     5230   4175   4675   -492     51    214
ATOM   1246  ND2 ASN A  77      19.135  54.915  59.849  1.00 30.66           N  
ANISOU 1246  ND2 ASN A  77     4469   3347   3832   -552    228    347
ATOM   1247  H   ASN A  77      17.446  56.522  63.101  1.00  0.00           H  
ATOM   1248  HA  ASN A  77      16.614  55.994  60.289  1.00  0.00           H  
ATOM   1249  HB3 ASN A  77      16.876  53.628  60.749  1.00  0.00           H  
ATOM   1250  HB2 ASN A  77      17.250  53.928  62.426  1.00  0.00           H  
ATOM   1251 HD22 ASN A  77      20.095  54.942  59.539  1.00  0.00           H  
ATOM   1252 HD21 ASN A  77      18.406  55.261  59.238  1.00  0.00           H  
ATOM   1253  N   VAL A  78      14.527  56.654  62.204  1.00 38.05           N  
ANISOU 1253  N   VAL A  78     5453   4464   4540   -592    -85    306
ATOM   1254  CA  VAL A  78      13.081  56.855  62.286  1.00 37.61           C  
ANISOU 1254  CA  VAL A  78     5429   4448   4414   -614   -113    320
ATOM   1255  C   VAL A  78      12.779  58.233  61.668  1.00 37.89           C  
ANISOU 1255  C   VAL A  78     5430   4482   4483   -628   -120    356
ATOM   1256  O   VAL A  78      13.553  59.171  61.871  1.00 36.51           O  
ANISOU 1256  O   VAL A  78     5191   4273   4410   -611   -128    352
ATOM   1257  CB  VAL A  78      12.578  56.806  63.760  1.00 38.18           C  
ANISOU 1257  CB  VAL A  78     5512   4521   4472   -571   -153    290
ATOM   1258  CG1 VAL A  78      11.085  57.164  63.934  1.00 30.85           C  
ANISOU 1258  CG1 VAL A  78     4588   3610   3522   -598   -154    313
ATOM   1259  CG2 VAL A  78      12.843  55.423  64.387  1.00 35.09           C  
ANISOU 1259  CG2 VAL A  78     5184   4119   4031   -537   -120    268
ATOM   1260  H   VAL A  78      15.088  57.453  62.471  1.00  0.00           H  
ATOM   1261  HA  VAL A  78      12.551  56.098  61.705  1.00  0.00           H  
ATOM   1262  HB  VAL A  78      13.148  57.533  64.341  1.00  0.00           H  
ATOM   1263 HG11 VAL A  78      10.764  57.024  64.966  1.00  0.00           H  
ATOM   1264 HG12 VAL A  78      10.879  58.204  63.683  1.00  0.00           H  
ATOM   1265 HG13 VAL A  78      10.454  56.535  63.305  1.00  0.00           H  
ATOM   1266 HG21 VAL A  78      12.448  55.365  65.401  1.00  0.00           H  
ATOM   1267 HG22 VAL A  78      12.375  54.627  63.806  1.00  0.00           H  
ATOM   1268 HG23 VAL A  78      13.910  55.206  64.448  1.00  0.00           H  
ATOM   1269  N   ILE A  79      11.688  58.338  60.898  1.00 39.50           N  
ANISOU 1269  N   ILE A  79     5677   4715   4617   -648   -126    379
ATOM   1270  CA  ILE A  79      11.291  59.566  60.206  1.00 41.16           C  
ANISOU 1270  CA  ILE A  79     5885   4926   4829   -640   -131    418
ATOM   1271  C   ILE A  79      11.014  60.739  61.187  1.00 41.05           C  
ANISOU 1271  C   ILE A  79     5799   4908   4890   -638   -171    413
ATOM   1272  O   ILE A  79      10.365  60.543  62.215  1.00 43.09           O  
ANISOU 1272  O   ILE A  79     6044   5180   5149   -636   -210    382
ATOM   1273  CB  ILE A  79      10.066  59.298  59.281  1.00 43.91           C  
ANISOU 1273  CB  ILE A  79     6297   5306   5083   -635   -181    413
ATOM   1274  CG1 ILE A  79       9.851  60.384  58.209  1.00 50.10           C  
ANISOU 1274  CG1 ILE A  79     7141   6078   5816   -582   -160    464
ATOM   1275  CG2 ILE A  79       8.742  59.062  60.039  1.00 43.99           C  
ANISOU 1275  CG2 ILE A  79     6253   5337   5125   -663   -254    377
ATOM   1276  CD1 ILE A  79      10.971  60.511  57.164  1.00 57.05           C  
ANISOU 1276  CD1 ILE A  79     8115   6917   6646   -530    -53    510
ATOM   1277  H   ILE A  79      11.089  57.526  60.768  1.00  0.00           H  
ATOM   1278  HA  ILE A  79      12.145  59.842  59.589  1.00  0.00           H  
ATOM   1279  HB  ILE A  79      10.277  58.372  58.743  1.00  0.00           H  
ATOM   1280 HG13 ILE A  79       9.675  61.351  58.674  1.00  0.00           H  
ATOM   1281 HG12 ILE A  79       8.935  60.132  57.680  1.00  0.00           H  
ATOM   1282 HG21 ILE A  79       7.950  58.743  59.362  1.00  0.00           H  
ATOM   1283 HG22 ILE A  79       8.856  58.291  60.801  1.00  0.00           H  
ATOM   1284 HG23 ILE A  79       8.383  59.965  60.534  1.00  0.00           H  
ATOM   1285 HD11 ILE A  79      10.689  61.216  56.381  1.00  0.00           H  
ATOM   1286 HD12 ILE A  79      11.902  60.875  57.595  1.00  0.00           H  
ATOM   1287 HD13 ILE A  79      11.169  59.555  56.678  1.00  0.00           H  
ATOM   1288  N   SER A  80      11.546  61.926  60.868  1.00 41.17           N  
ANISOU 1288  N   SER A  80     5782   4889   4973   -625   -141    446
ATOM   1289  CA  SER A  80      11.582  63.072  61.771  1.00 42.80           C  
ANISOU 1289  CA  SER A  80     5913   5069   5279   -616   -180    427
ATOM   1290  C   SER A  80      10.492  64.079  61.376  1.00 43.81           C  
ANISOU 1290  C   SER A  80     6043   5212   5390   -613   -195    466
ATOM   1291  O   SER A  80      10.605  64.712  60.322  1.00 46.57           O  
ANISOU 1291  O   SER A  80     6417   5536   5743   -599   -131    521
ATOM   1292  CB  SER A  80      13.001  63.685  61.711  1.00 43.35           C  
ANISOU 1292  CB  SER A  80     5907   5054   5509   -607   -129    418
ATOM   1293  OG  SER A  80      13.182  64.773  62.605  1.00 47.15           O  
ANISOU 1293  OG  SER A  80     6309   5498   6108   -586   -208    358
ATOM   1294  H   SER A  80      12.008  62.053  59.982  1.00  0.00           H  
ATOM   1295  HA  SER A  80      11.410  62.747  62.801  1.00  0.00           H  
ATOM   1296  HB3 SER A  80      13.234  64.021  60.700  1.00  0.00           H  
ATOM   1297  HB2 SER A  80      13.740  62.922  61.961  1.00  0.00           H  
ATOM   1298  HG  SER A  80      12.662  65.522  62.290  1.00  0.00           H  
ATOM   1299  N   LEU A  81       9.468  64.220  62.229  1.00 44.12           N  
ANISOU 1299  N   LEU A  81     6071   5283   5409   -611   -260    445
ATOM   1300  CA  LEU A  81       8.433  65.249  62.127  1.00 42.47           C  
ANISOU 1300  CA  LEU A  81     5856   5089   5191   -605   -283    476
ATOM   1301  C   LEU A  81       9.047  66.633  62.411  1.00 41.94           C  
ANISOU 1301  C   LEU A  81     5738   4967   5229   -590   -266    488
ATOM   1302  O   LEU A  81       9.533  66.876  63.514  1.00 43.01           O  
ANISOU 1302  O   LEU A  81     5828   5067   5449   -574   -305    437
ATOM   1303  CB  LEU A  81       7.275  64.896  63.090  1.00 41.55           C  
ANISOU 1303  CB  LEU A  81     5732   5001   5055   -601   -328    456
ATOM   1304  CG  LEU A  81       6.088  65.891  63.129  1.00 40.82           C  
ANISOU 1304  CG  LEU A  81     5619   4922   4969   -593   -355    482
ATOM   1305  CD1 LEU A  81       5.405  66.046  61.759  1.00 32.73           C  
ANISOU 1305  CD1 LEU A  81     4609   3929   3899   -603   -385    492
ATOM   1306  CD2 LEU A  81       5.074  65.513  64.229  1.00 39.33           C  
ANISOU 1306  CD2 LEU A  81     5420   4725   4798   -569   -357    469
ATOM   1307  H   LEU A  81       9.465  63.674  63.079  1.00  0.00           H  
ATOM   1308  HA  LEU A  81       8.047  65.237  61.106  1.00  0.00           H  
ATOM   1309  HB3 LEU A  81       7.682  64.795  64.098  1.00  0.00           H  
ATOM   1310  HB2 LEU A  81       6.893  63.914  62.813  1.00  0.00           H  
ATOM   1311  HG  LEU A  81       6.479  66.869  63.412  1.00  0.00           H  
ATOM   1312 HD11 LEU A  81       5.733  66.961  61.271  1.00  0.00           H  
ATOM   1313 HD12 LEU A  81       5.635  65.222  61.083  1.00  0.00           H  
ATOM   1314 HD13 LEU A  81       4.321  66.108  61.846  1.00  0.00           H  
ATOM   1315 HD21 LEU A  81       4.702  66.402  64.737  1.00  0.00           H  
ATOM   1316 HD22 LEU A  81       4.211  64.977  63.831  1.00  0.00           H  
ATOM   1317 HD23 LEU A  81       5.518  64.881  64.997  1.00  0.00           H  
ATOM   1318  N   GLN A  82       9.036  67.490  61.391  1.00 43.39           N  
ANISOU 1318  N   GLN A  82     5941   5132   5414   -579   -212    548
ATOM   1319  CA  GLN A  82       9.602  68.836  61.397  1.00 43.93           C  
ANISOU 1319  CA  GLN A  82     5954   5123   5615   -568   -165    569
ATOM   1320  C   GLN A  82       8.625  69.886  61.946  1.00 43.57           C  
ANISOU 1320  C   GLN A  82     5895   5097   5563   -555   -222    574
ATOM   1321  O   GLN A  82       9.069  70.801  62.638  1.00 46.46           O  
ANISOU 1321  O   GLN A  82     6195   5407   6050   -550   -242    544
ATOM   1322  CB  GLN A  82      10.034  69.213  59.960  1.00 44.56           C  
ANISOU 1322  CB  GLN A  82     6082   5142   5707   -539    -25    652
ATOM   1323  CG  GLN A  82      11.140  68.326  59.349  1.00 48.35           C  
ANISOU 1323  CG  GLN A  82     6574   5576   6223   -540     70    662
ATOM   1324  CD  GLN A  82      12.443  68.310  60.153  1.00 56.41           C  
ANISOU 1324  CD  GLN A  82     7457   6506   7469   -572     81    600
ATOM   1325  OE1 GLN A  82      12.876  69.336  60.673  1.00 63.58           O  
ANISOU 1325  OE1 GLN A  82     8265   7330   8562   -577     87    578
ATOM   1326  NE2 GLN A  82      13.084  67.143  60.242  1.00 63.87           N  
ANISOU 1326  NE2 GLN A  82     8391   7460   8415   -586     68    557
ATOM   1327  H   GLN A  82       8.613  67.189  60.522  1.00  0.00           H  
ATOM   1328  HA  GLN A  82      10.479  68.850  62.046  1.00  0.00           H  
ATOM   1329  HB3 GLN A  82      10.371  70.251  59.942  1.00  0.00           H  
ATOM   1330  HB2 GLN A  82       9.167  69.178  59.300  1.00  0.00           H  
ATOM   1331  HG3 GLN A  82      11.366  68.674  58.340  1.00  0.00           H  
ATOM   1332  HG2 GLN A  82      10.774  67.305  59.241  1.00  0.00           H  
ATOM   1333 HE22 GLN A  82      13.958  67.082  60.743  1.00  0.00           H  
ATOM   1334 HE21 GLN A  82      12.712  66.319  59.793  1.00  0.00           H  
ATOM   1335  N   LYS A  83       7.329  69.762  61.606  1.00 41.88           N  
ANISOU 1335  N   LYS A  83     5735   4953   5226   -544   -260    599
ATOM   1336  CA  LYS A  83       6.321  70.794  61.859  1.00 42.38           C  
ANISOU 1336  CA  LYS A  83     5786   5031   5284   -526   -299    617
ATOM   1337  C   LYS A  83       4.916  70.205  61.657  1.00 40.64           C  
ANISOU 1337  C   LYS A  83     5587   4881   4973   -521   -367    609
ATOM   1338  O   LYS A  83       4.749  69.305  60.835  1.00 40.30           O  
ANISOU 1338  O   LYS A  83     5588   4866   4859   -517   -384    602
ATOM   1339  CB  LYS A  83       6.577  71.979  60.894  1.00 44.80           C  
ANISOU 1339  CB  LYS A  83     6125   5290   5608   -487   -222    686
ATOM   1340  CG  LYS A  83       5.904  73.305  61.267  1.00 49.55           C  
ANISOU 1340  CG  LYS A  83     6679   5853   6296   -478   -226    696
ATOM   1341  CD  LYS A  83       6.393  74.427  60.337  1.00 56.79           C  
ANISOU 1341  CD  LYS A  83     7631   6690   7256   -435   -104    776
ATOM   1342  CE  LYS A  83       5.845  75.812  60.688  1.00 57.26           C  
ANISOU 1342  CE  LYS A  83     7620   6680   7457   -439    -92    772
ATOM   1343  NZ  LYS A  83       6.461  76.349  61.912  0.00 61.48           N1+
ANISOU 1343  NZ  LYS A  83     8044   7127   8190   -480    -99    696
ATOM   1344  H   LYS A  83       7.025  68.971  61.055  1.00  0.00           H  
ATOM   1345  HA  LYS A  83       6.411  71.127  62.895  1.00  0.00           H  
ATOM   1346  HB3 LYS A  83       6.296  71.705  59.878  1.00  0.00           H  
ATOM   1347  HB2 LYS A  83       7.647  72.185  60.854  1.00  0.00           H  
ATOM   1348  HG3 LYS A  83       6.130  73.551  62.305  1.00  0.00           H  
ATOM   1349  HG2 LYS A  83       4.820  73.212  61.193  1.00  0.00           H  
ATOM   1350  HD3 LYS A  83       6.116  74.184  59.312  1.00  0.00           H  
ATOM   1351  HD2 LYS A  83       7.483  74.464  60.340  1.00  0.00           H  
ATOM   1352  HE3 LYS A  83       4.761  75.785  60.802  1.00  0.00           H  
ATOM   1353  HE2 LYS A  83       6.058  76.502  59.871  1.00  0.00           H  
ATOM   1354  HZ1 LYS A  83       7.459  76.434  61.787  1.00  0.00           H  
ATOM   1355  HZ2 LYS A  83       6.066  77.271  62.082  1.00  0.00           H  
ATOM   1356  HZ3 LYS A  83       6.258  75.747  62.696  1.00  0.00           H  
ATOM   1357  N   VAL A  84       3.928  70.746  62.386  1.00 39.07           N  
ANISOU 1357  N   VAL A  84     5349   4695   4800   -517   -406    602
ATOM   1358  CA  VAL A  84       2.517  70.385  62.245  1.00 39.92           C  
ANISOU 1358  CA  VAL A  84     5438   4840   4891   -511   -461    593
ATOM   1359  C   VAL A  84       1.715  71.670  61.976  1.00 41.47           C  
ANISOU 1359  C   VAL A  84     5632   5038   5087   -470   -485    629
ATOM   1360  O   VAL A  84       1.875  72.645  62.712  1.00 44.60           O  
ANISOU 1360  O   VAL A  84     6013   5409   5526   -461   -458    650
ATOM   1361  CB  VAL A  84       1.953  69.711  63.533  1.00 39.08           C  
ANISOU 1361  CB  VAL A  84     5286   4725   4838   -525   -449    569
ATOM   1362  CG1 VAL A  84       0.456  69.336  63.431  1.00 31.94           C  
ANISOU 1362  CG1 VAL A  84     4318   3826   3989   -526   -484    557
ATOM   1363  CG2 VAL A  84       2.772  68.469  63.931  1.00 38.58           C  
ANISOU 1363  CG2 VAL A  84     5243   4653   4763   -547   -417    538
ATOM   1364  H   VAL A  84       4.128  71.494  63.033  1.00  0.00           H  
ATOM   1365  HA  VAL A  84       2.376  69.704  61.406  1.00  0.00           H  
ATOM   1366  HB  VAL A  84       2.043  70.416  64.362  1.00  0.00           H  
ATOM   1367 HG11 VAL A  84       0.125  68.792  64.316  1.00  0.00           H  
ATOM   1368 HG12 VAL A  84      -0.185  70.213  63.347  1.00  0.00           H  
ATOM   1369 HG13 VAL A  84       0.265  68.702  62.565  1.00  0.00           H  
ATOM   1370 HG21 VAL A  84       2.331  67.953  64.784  1.00  0.00           H  
ATOM   1371 HG22 VAL A  84       2.844  67.756  63.111  1.00  0.00           H  
ATOM   1372 HG23 VAL A  84       3.790  68.738  64.214  1.00  0.00           H  
ATOM   1373  N   PHE A  85       0.854  71.632  60.946  1.00 41.26           N  
ANISOU 1373  N   PHE A  85     5627   5037   5012   -431   -552    624
ATOM   1374  CA  PHE A  85      -0.105  72.695  60.637  1.00 42.45           C  
ANISOU 1374  CA  PHE A  85     5777   5195   5158   -375   -598    647
ATOM   1375  C   PHE A  85      -1.512  72.191  60.978  1.00 43.26           C  
ANISOU 1375  C   PHE A  85     5784   5311   5344   -381   -683    595
ATOM   1376  O   PHE A  85      -1.844  71.042  60.677  1.00 42.45           O  
ANISOU 1376  O   PHE A  85     5654   5214   5263   -390   -754    531
ATOM   1377  CB  PHE A  85      -0.057  73.069  59.142  1.00 45.49           C  
ANISOU 1377  CB  PHE A  85     6278   5585   5423   -282   -628    670
ATOM   1378  CG  PHE A  85       1.290  73.508  58.601  1.00 49.39           C  
ANISOU 1378  CG  PHE A  85     6862   6034   5870   -261   -499    739
ATOM   1379  CD1 PHE A  85       1.715  74.842  58.764  1.00 48.34           C  
ANISOU 1379  CD1 PHE A  85     6749   5854   5765   -231   -412    807
ATOM   1380  CD2 PHE A  85       2.182  72.562  58.051  1.00 47.15           C  
ANISOU 1380  CD2 PHE A  85     6635   5736   5543   -268   -447    737
ATOM   1381  CE1 PHE A  85       2.967  75.228  58.311  1.00 48.77           C  
ANISOU 1381  CE1 PHE A  85     6860   5833   5838   -214   -262    872
ATOM   1382  CE2 PHE A  85       3.433  72.969  57.606  1.00 46.04           C  
ANISOU 1382  CE2 PHE A  85     6558   5528   5407   -246   -297    807
ATOM   1383  CZ  PHE A  85       3.816  74.298  57.727  1.00 50.45           C  
ANISOU 1383  CZ  PHE A  85     7119   6024   6028   -221   -198    874
ATOM   1384  H   PHE A  85       0.770  70.785  60.398  1.00  0.00           H  
ATOM   1385  HA  PHE A  85       0.110  73.592  61.221  1.00  0.00           H  
ATOM   1386  HB3 PHE A  85      -0.757  73.887  58.963  1.00  0.00           H  
ATOM   1387  HB2 PHE A  85      -0.424  72.249  58.533  1.00  0.00           H  
ATOM   1388  HD1 PHE A  85       1.064  75.567  59.229  1.00  0.00           H  
ATOM   1389  HD2 PHE A  85       1.892  71.525  57.962  1.00  0.00           H  
ATOM   1390  HE1 PHE A  85       3.284  76.254  58.419  1.00  0.00           H  
ATOM   1391  HE2 PHE A  85       4.109  72.251  57.166  1.00  0.00           H  
ATOM   1392  HZ  PHE A  85       4.788  74.611  57.384  1.00  0.00           H  
ATOM   1393  N   LEU A  86      -2.316  73.089  61.563  1.00 44.86           N  
ANISOU 1393  N   LEU A  86     5926   5501   5617   -375   -671    617
ATOM   1394  CA  LEU A  86      -3.723  72.868  61.878  1.00 45.89           C  
ANISOU 1394  CA  LEU A  86     5942   5619   5875   -373   -726    578
ATOM   1395  C   LEU A  86      -4.528  73.896  61.077  1.00 46.91           C  
ANISOU 1395  C   LEU A  86     6076   5764   5985   -294   -824    579
ATOM   1396  O   LEU A  86      -4.675  75.037  61.518  1.00 48.35           O  
ANISOU 1396  O   LEU A  86     6282   5944   6147   -268   -778    638
ATOM   1397  CB  LEU A  86      -3.941  73.025  63.404  1.00 46.33           C  
ANISOU 1397  CB  LEU A  86     5940   5635   6026   -403   -613    612
ATOM   1398  CG  LEU A  86      -3.245  71.952  64.273  1.00 50.00           C  
ANISOU 1398  CG  LEU A  86     6428   6076   6494   -443   -514    612
ATOM   1399  CD1 LEU A  86      -3.395  72.278  65.775  1.00 48.25           C  
ANISOU 1399  CD1 LEU A  86     6206   5807   6322   -417   -402    654
ATOM   1400  CD2 LEU A  86      -3.721  70.524  63.941  1.00 48.64           C  
ANISOU 1400  CD2 LEU A  86     6191   5885   6405   -483   -532    555
ATOM   1401  H   LEU A  86      -1.962  74.012  61.769  1.00  0.00           H  
ATOM   1402  HA  LEU A  86      -4.050  71.873  61.568  1.00  0.00           H  
ATOM   1403  HB3 LEU A  86      -5.011  73.005  63.617  1.00  0.00           H  
ATOM   1404  HB2 LEU A  86      -3.593  74.011  63.715  1.00  0.00           H  
ATOM   1405  HG  LEU A  86      -2.176  71.994  64.058  1.00  0.00           H  
ATOM   1406 HD11 LEU A  86      -2.421  72.300  66.264  1.00  0.00           H  
ATOM   1407 HD12 LEU A  86      -3.857  73.252  65.938  1.00  0.00           H  
ATOM   1408 HD13 LEU A  86      -4.008  71.548  66.304  1.00  0.00           H  
ATOM   1409 HD21 LEU A  86      -3.837  69.899  64.827  1.00  0.00           H  
ATOM   1410 HD22 LEU A  86      -4.682  70.532  63.426  1.00  0.00           H  
ATOM   1411 HD23 LEU A  86      -3.003  70.023  63.292  1.00  0.00           H  
ATOM   1412  N   SER A  87      -5.012  73.479  59.896  1.00 49.16           N  
ANISOU 1412  N   SER A  87     6350   6058   6269   -240   -973    503
ATOM   1413  CA  SER A  87      -5.857  74.292  59.022  1.00 52.21           C  
ANISOU 1413  CA  SER A  87     6767   6459   6613   -128  -1100    486
ATOM   1414  C   SER A  87      -7.291  74.308  59.579  1.00 54.49           C  
ANISOU 1414  C   SER A  87     6875   6713   7115   -140  -1152    442
ATOM   1415  O   SER A  87      -7.987  73.297  59.494  1.00 52.37           O  
ANISOU 1415  O   SER A  87     6468   6407   7023   -164  -1241    343
ATOM   1416  CB  SER A  87      -5.753  73.748  57.583  1.00 54.87           C  
ANISOU 1416  CB  SER A  87     7201   6811   6835    -24  -1268    405
ATOM   1417  OG  SER A  87      -6.528  74.512  56.684  1.00 55.40           O  
ANISOU 1417  OG  SER A  87     7348   6889   6811    125  -1392    393
ATOM   1418  H   SER A  87      -4.862  72.524  59.599  1.00  0.00           H  
ATOM   1419  HA  SER A  87      -5.470  75.314  59.012  1.00  0.00           H  
ATOM   1420  HB3 SER A  87      -6.084  72.710  57.530  1.00  0.00           H  
ATOM   1421  HB2 SER A  87      -4.716  73.765  57.244  1.00  0.00           H  
ATOM   1422  HG  SER A  87      -7.319  73.999  56.471  1.00  0.00           H  
ATOM   1423  N   HIS A  88      -7.674  75.441  60.193  1.00 56.72           N  
ANISOU 1423  N   HIS A  88     7149   6993   7408   -124  -1083    513
ATOM   1424  CA  HIS A  88      -8.926  75.613  60.938  1.00 60.79           C  
ANISOU 1424  CA  HIS A  88     7496   7464   8137   -137  -1077    499
ATOM   1425  C   HIS A  88     -10.197  75.597  60.069  1.00 63.68           C  
ANISOU 1425  C   HIS A  88     7758   7815   8624    -54  -1289    388
ATOM   1426  O   HIS A  88     -11.233  75.143  60.554  1.00 66.89           O  
ANISOU 1426  O   HIS A  88     7965   8152   9296    -91  -1314    319
ATOM   1427  CB  HIS A  88      -8.866  76.923  61.757  1.00 60.41           C  
ANISOU 1427  CB  HIS A  88     7492   7417   8044   -124   -957    603
ATOM   1428  CG  HIS A  88      -8.035  76.888  63.020  1.00 64.18           C  
ANISOU 1428  CG  HIS A  88     7995   7871   8518   -197   -771    672
ATOM   1429  ND1 HIS A  88      -6.780  76.308  63.105  1.00 63.55           N  
ANISOU 1429  ND1 HIS A  88     8011   7807   8327   -241   -712    686
ATOM   1430  CD2 HIS A  88      -8.300  77.365  64.286  1.00 64.48           C  
ANISOU 1430  CD2 HIS A  88     7994   7865   8642   -207   -641    724
ATOM   1431  CE1 HIS A  88      -6.357  76.454  64.363  1.00 59.94           C  
ANISOU 1431  CE1 HIS A  88     7571   7318   7884   -269   -581    729
ATOM   1432  NE2 HIS A  88      -7.226  77.093  65.136  1.00 62.88           N  
ANISOU 1432  NE2 HIS A  88     7879   7653   8360   -241   -531    756
ATOM   1433  H   HIS A  88      -7.037  76.223  60.214  1.00  0.00           H  
ATOM   1434  HA  HIS A  88      -9.020  74.779  61.636  1.00  0.00           H  
ATOM   1435  HB3 HIS A  88      -9.872  77.215  62.064  1.00  0.00           H  
ATOM   1436  HB2 HIS A  88      -8.502  77.740  61.133  1.00  0.00           H  
ATOM   1437  HD1 HIS A  88      -6.268  75.847  62.363  1.00  0.00           H  
ATOM   1438  HD2 HIS A  88      -9.176  77.883  64.648  1.00  0.00           H  
ATOM   1439  HE1 HIS A  88      -5.402  76.090  64.714  1.00  0.00           H  
ATOM   1440  N   ALA A  89     -10.102  76.106  58.827  1.00 65.35           N  
ANISOU 1440  N   ALA A  89     8107   8071   8652     74  -1436    369
ATOM   1441  CA  ALA A  89     -11.232  76.299  57.914  1.00 68.25           C  
ANISOU 1441  CA  ALA A  89     8416   8427   9090    203  -1683    249
ATOM   1442  C   ALA A  89     -11.894  74.995  57.437  1.00 69.35           C  
ANISOU 1442  C   ALA A  89     8399   8516   9434    194  -1866     79
ATOM   1443  O   ALA A  89     -13.121  74.941  57.367  1.00 72.00           O  
ANISOU 1443  O   ALA A  89     8524   8788  10046    208  -1992    -28
ATOM   1444  CB  ALA A  89     -10.766  77.140  56.715  1.00 68.15           C  
ANISOU 1444  CB  ALA A  89     8651   8466   8778    380  -1788    268
ATOM   1445  H   ALA A  89      -9.207  76.437  58.497  1.00  0.00           H  
ATOM   1446  HA  ALA A  89     -11.991  76.873  58.449  1.00  0.00           H  
ATOM   1447  HB1 ALA A  89     -11.585  77.322  56.017  1.00  0.00           H  
ATOM   1448  HB2 ALA A  89     -10.394  78.112  57.040  1.00  0.00           H  
ATOM   1449  HB3 ALA A  89      -9.965  76.644  56.164  1.00  0.00           H  
ATOM   1450  N   ASP A  90     -11.069  73.979  57.136  1.00 69.09           N  
ANISOU 1450  N   ASP A  90     8457   8497   9296    168  -1874     49
ATOM   1451  CA  ASP A  90     -11.482  72.655  56.655  1.00 69.93           C  
ANISOU 1451  CA  ASP A  90     8434   8548   9588    157  -2048   -122
ATOM   1452  C   ASP A  90     -11.313  71.565  57.735  1.00 68.90           C  
ANISOU 1452  C   ASP A  90     8161   8362   9658    -24  -1857   -101
ATOM   1453  O   ASP A  90     -11.801  70.452  57.533  1.00 71.75           O  
ANISOU 1453  O   ASP A  90     8404   8661  10199    -53  -1964   -233
ATOM   1454  CB  ASP A  90     -10.745  72.246  55.348  1.00 71.04           C  
ANISOU 1454  CB  ASP A  90     8802   8732   9457    300  -2233   -196
ATOM   1455  CG  ASP A  90      -9.220  72.447  55.321  1.00 68.99           C  
ANISOU 1455  CG  ASP A  90     8772   8533   8908    266  -2027    -51
ATOM   1456  OD1 ASP A  90      -8.623  72.672  56.398  1.00 72.52           O  
ANISOU 1456  OD1 ASP A  90     9222   8998   9335    156  -1781     98
ATOM   1457  OD2 ASP A  90      -8.661  72.313  54.213  1.00 68.42           O1-
ANISOU 1457  OD2 ASP A  90     8879   8479   8636    364  -2118    -94
ATOM   1458  H   ASP A  90     -10.069  74.110  57.213  1.00  0.00           H  
ATOM   1459  HA  ASP A  90     -12.547  72.675  56.420  1.00  0.00           H  
ATOM   1460  HB3 ASP A  90     -11.163  72.847  54.540  1.00  0.00           H  
ATOM   1461  HB2 ASP A  90     -10.956  71.202  55.110  1.00  0.00           H  
ATOM   1462  N   ARG A  91     -10.621  71.894  58.842  1.00 66.50           N  
ANISOU 1462  N   ARG A  91     7876   8069   9323   -126  -1584     56
ATOM   1463  CA  ARG A  91     -10.255  71.009  59.954  1.00 65.82           C  
ANISOU 1463  CA  ARG A  91     7704   7927   9378   -262  -1374    100
ATOM   1464  C   ARG A  91      -9.286  69.877  59.551  1.00 62.76           C  
ANISOU 1464  C   ARG A  91     7406   7557   8882   -299  -1385     63
ATOM   1465  O   ARG A  91      -9.334  68.800  60.143  1.00 61.84           O  
ANISOU 1465  O   ARG A  91     7168   7365   8963   -381  -1318     19
ATOM   1466  CB  ARG A  91     -11.508  70.503  60.710  1.00 68.69           C  
ANISOU 1466  CB  ARG A  91     7791   8160  10148   -316  -1337     35
ATOM   1467  CG  ARG A  91     -12.356  71.633  61.316  1.00 74.26           C  
ANISOU 1467  CG  ARG A  91     8399   8834  10981   -286  -1277     91
ATOM   1468  CD  ARG A  91     -13.529  71.116  62.167  1.00 82.84           C  
ANISOU 1468  CD  ARG A  91     9228   9764  12482   -354  -1112     84
ATOM   1469  NE  ARG A  91     -13.077  70.393  63.366  1.00 85.47           N  
ANISOU 1469  NE  ARG A  91     9602  10048  12823   -436   -834    183
ATOM   1470  CZ  ARG A  91     -12.532  70.931  64.470  1.00 87.45           C  
ANISOU 1470  CZ  ARG A  91    10013  10332  12882   -437   -608    338
ATOM   1471  NH1 ARG A  91     -12.139  70.124  65.463  1.00 90.32           N  
ANISOU 1471  NH1 ARG A  91    10427  10642  13250   -479   -388    406
ATOM   1472  NH2 ARG A  91     -12.373  72.256  64.599  1.00 87.47           N1+
ANISOU 1472  NH2 ARG A  91    10133  10412  12689   -382   -608    418
ATOM   1473  H   ARG A  91     -10.245  72.830  58.905  1.00  0.00           H  
ATOM   1474  HA  ARG A  91      -9.691  71.630  60.651  1.00  0.00           H  
ATOM   1475  HB3 ARG A  91     -11.190  69.851  61.524  1.00  0.00           H  
ATOM   1476  HB2 ARG A  91     -12.127  69.890  60.057  1.00  0.00           H  
ATOM   1477  HG3 ARG A  91     -12.714  72.342  60.569  1.00  0.00           H  
ATOM   1478  HG2 ARG A  91     -11.686  72.201  61.962  1.00  0.00           H  
ATOM   1479  HD3 ARG A  91     -14.051  70.359  61.582  1.00  0.00           H  
ATOM   1480  HD2 ARG A  91     -14.265  71.891  62.381  1.00  0.00           H  
ATOM   1481  HE  ARG A  91     -13.159  69.387  63.316  1.00  0.00           H  
ATOM   1482 HH12 ARG A  91     -11.729  70.509  66.302  1.00  0.00           H  
ATOM   1483 HH11 ARG A  91     -12.268  69.126  65.393  1.00  0.00           H  
ATOM   1484 HH22 ARG A  91     -11.964  72.649  65.434  1.00  0.00           H  
ATOM   1485 HH21 ARG A  91     -12.669  72.873  63.855  1.00  0.00           H  
ATOM   1486  N   LYS A  92      -8.410  70.141  58.567  1.00 59.65           N  
ANISOU 1486  N   LYS A  92     7231   7249   8184   -233  -1443     91
ATOM   1487  CA  LYS A  92      -7.394  69.198  58.098  1.00 57.01           C  
ANISOU 1487  CA  LYS A  92     7008   6937   7718   -252  -1443     70
ATOM   1488  C   LYS A  92      -6.068  69.411  58.844  1.00 51.56           C  
ANISOU 1488  C   LYS A  92     6440   6286   6864   -318  -1220    210
ATOM   1489  O   LYS A  92      -5.664  70.553  59.072  1.00 49.75           O  
ANISOU 1489  O   LYS A  92     6276   6087   6540   -305  -1125    311
ATOM   1490  CB  LYS A  92      -7.208  69.365  56.575  1.00 59.01           C  
ANISOU 1490  CB  LYS A  92     7432   7233   7756   -105  -1650     -1
ATOM   1491  CG  LYS A  92      -8.460  69.019  55.740  1.00 66.20           C  
ANISOU 1491  CG  LYS A  92     8239   8096   8817     -5  -1940   -186
ATOM   1492  CD  LYS A  92      -8.934  67.554  55.801  1.00 71.05           C  
ANISOU 1492  CD  LYS A  92     8676   8627   9694    -82  -2020   -330
ATOM   1493  CE  LYS A  92      -7.918  66.563  55.218  1.00 74.51           C  
ANISOU 1493  CE  LYS A  92     9281   9089   9941    -58  -2055   -364
ATOM   1494  NZ  LYS A  92      -8.453  65.193  55.176  1.00 74.76           N1+
ANISOU 1494  NZ  LYS A  92     9146   9028  10233   -111  -2175   -531
ATOM   1495  H   LYS A  92      -8.416  71.050  58.122  1.00  0.00           H  
ATOM   1496  HA  LYS A  92      -7.724  68.177  58.293  1.00  0.00           H  
ATOM   1497  HB3 LYS A  92      -6.372  68.753  56.235  1.00  0.00           H  
ATOM   1498  HB2 LYS A  92      -6.917  70.395  56.359  1.00  0.00           H  
ATOM   1499  HG3 LYS A  92      -8.272  69.288  54.700  1.00  0.00           H  
ATOM   1500  HG2 LYS A  92      -9.287  69.653  56.057  1.00  0.00           H  
ATOM   1501  HD3 LYS A  92      -9.871  67.474  55.249  1.00  0.00           H  
ATOM   1502  HD2 LYS A  92      -9.178  67.280  56.827  1.00  0.00           H  
ATOM   1503  HE3 LYS A  92      -6.999  66.560  55.803  1.00  0.00           H  
ATOM   1504  HE2 LYS A  92      -7.664  66.855  54.201  1.00  0.00           H  
ATOM   1505  HZ1 LYS A  92      -8.683  64.902  56.120  1.00  0.00           H  
ATOM   1506  HZ2 LYS A  92      -9.281  65.163  54.600  1.00  0.00           H  
ATOM   1507  HZ3 LYS A  92      -7.753  64.568  54.801  1.00  0.00           H  
ATOM   1508  N   VAL A  93      -5.412  68.291  59.182  1.00 48.50           N  
ANISOU 1508  N   VAL A  93     6074   5890   6465   -381  -1155    200
ATOM   1509  CA  VAL A  93      -4.102  68.259  59.829  1.00 45.96           C  
ANISOU 1509  CA  VAL A  93     5852   5594   6016   -435   -978    300
ATOM   1510  C   VAL A  93      -3.051  67.863  58.777  1.00 43.82           C  
ANISOU 1510  C   VAL A  93     5736   5360   5552   -397  -1015    293
ATOM   1511  O   VAL A  93      -3.260  66.891  58.049  1.00 44.45           O  
ANISOU 1511  O   VAL A  93     5816   5426   5647   -384  -1117    203
ATOM   1512  CB  VAL A  93      -4.055  67.201  60.970  1.00 46.31           C  
ANISOU 1512  CB  VAL A  93     5802   5582   6212   -526   -840    305
ATOM   1513  CG1 VAL A  93      -2.674  67.096  61.652  1.00 42.45           C  
ANISOU 1513  CG1 VAL A  93     5423   5117   5587   -555   -700    382
ATOM   1514  CG2 VAL A  93      -5.139  67.453  62.033  1.00 50.16           C  
ANISOU 1514  CG2 VAL A  93     6153   6007   6898   -542   -758    329
ATOM   1515  H   VAL A  93      -5.807  67.392  58.949  1.00  0.00           H  
ATOM   1516  HA  VAL A  93      -3.853  69.236  60.248  1.00  0.00           H  
ATOM   1517  HB  VAL A  93      -4.273  66.222  60.541  1.00  0.00           H  
ATOM   1518 HG11 VAL A  93      -2.707  66.400  62.487  1.00  0.00           H  
ATOM   1519 HG12 VAL A  93      -1.902  66.731  60.974  1.00  0.00           H  
ATOM   1520 HG13 VAL A  93      -2.346  68.062  62.037  1.00  0.00           H  
ATOM   1521 HG21 VAL A  93      -5.087  66.716  62.835  1.00  0.00           H  
ATOM   1522 HG22 VAL A  93      -5.032  68.439  62.481  1.00  0.00           H  
ATOM   1523 HG23 VAL A  93      -6.141  67.391  61.608  1.00  0.00           H  
ATOM   1524  N   TRP A  94      -1.941  68.614  58.742  1.00 41.56           N  
ANISOU 1524  N   TRP A  94     5577   5105   5108   -373   -923    385
ATOM   1525  CA  TRP A  94      -0.797  68.364  57.866  1.00 41.77           C  
ANISOU 1525  CA  TRP A  94     5755   5146   4968   -328   -904    404
ATOM   1526  C   TRP A  94       0.462  68.159  58.715  1.00 40.60           C  
ANISOU 1526  C   TRP A  94     5617   4991   4818   -405   -746    464
ATOM   1527  O   TRP A  94       0.665  68.894  59.682  1.00 43.79           O  
ANISOU 1527  O   TRP A  94     5982   5387   5271   -442   -660    517
ATOM   1528  CB  TRP A  94      -0.599  69.546  56.902  1.00 41.93           C  
ANISOU 1528  CB  TRP A  94     5917   5175   4840   -210   -905    464
ATOM   1529  CG  TRP A  94      -1.698  69.819  55.919  1.00 44.17           C  
ANISOU 1529  CG  TRP A  94     6240   5467   5078    -87  -1084    397
ATOM   1530  CD1 TRP A  94      -2.904  70.369  56.192  1.00 38.70           C  
ANISOU 1530  CD1 TRP A  94     5446   4775   4482    -69  -1177    367
ATOM   1531  CD2 TRP A  94      -1.698  69.548  54.486  1.00 42.11           C  
ANISOU 1531  CD2 TRP A  94     6147   5206   4649     65  -1206    346
ATOM   1532  NE1 TRP A  94      -3.642  70.466  55.030  1.00 38.69           N  
ANISOU 1532  NE1 TRP A  94     5524   4776   4399     82  -1371    286
ATOM   1533  CE2 TRP A  94      -2.943  69.986  53.941  1.00 44.86           C  
ANISOU 1533  CE2 TRP A  94     6485   5556   5002    178  -1400    268
ATOM   1534  CE3 TRP A  94      -0.762  68.990  53.587  1.00 42.91           C  
ANISOU 1534  CE3 TRP A  94     6416   5297   4590    134  -1173    353
ATOM   1535  CZ2 TRP A  94      -3.236  69.883  52.570  1.00 48.15           C  
ANISOU 1535  CZ2 TRP A  94     7074   5968   5251    378  -1589    185
ATOM   1536  CZ3 TRP A  94      -1.044  68.880  52.210  1.00 48.18           C  
ANISOU 1536  CZ3 TRP A  94     7269   5958   5079    332  -1336    285
ATOM   1537  CH2 TRP A  94      -2.284  69.316  51.704  1.00 47.94           C  
ANISOU 1537  CH2 TRP A  94     7241   5932   5041    460  -1554    194
ATOM   1538  H   TRP A  94      -1.841  69.387  59.387  1.00  0.00           H  
ATOM   1539  HA  TRP A  94      -0.962  67.469  57.268  1.00  0.00           H  
ATOM   1540  HB3 TRP A  94       0.312  69.386  56.324  1.00  0.00           H  
ATOM   1541  HB2 TRP A  94      -0.424  70.456  57.465  1.00  0.00           H  
ATOM   1542  HD1 TRP A  94      -3.226  70.683  57.175  1.00  0.00           H  
ATOM   1543  HE1 TRP A  94      -4.573  70.860  55.003  1.00  0.00           H  
ATOM   1544  HE3 TRP A  94       0.184  68.645  53.971  1.00  0.00           H  
ATOM   1545  HZ2 TRP A  94      -4.187  70.225  52.189  1.00  0.00           H  
ATOM   1546  HZ3 TRP A  94      -0.309  68.453  51.543  1.00  0.00           H  
ATOM   1547  HH2 TRP A  94      -2.504  69.213  50.653  1.00  0.00           H  
ATOM   1548  N   LEU A  95       1.284  67.176  58.357  1.00 39.46           N  
ANISOU 1548  N   LEU A  95     5528   4844   4619   -417   -727    444
ATOM   1549  CA  LEU A  95       2.530  66.840  59.037  1.00 37.08           C  
ANISOU 1549  CA  LEU A  95     5234   4531   4324   -477   -602    482
ATOM   1550  C   LEU A  95       3.673  67.045  58.035  1.00 38.56           C  
ANISOU 1550  C   LEU A  95     5550   4705   4397   -418   -536    532
ATOM   1551  O   LEU A  95       3.637  66.450  56.956  1.00 37.30           O  
ANISOU 1551  O   LEU A  95     5494   4549   4129   -343   -591    509
ATOM   1552  CB  LEU A  95       2.467  65.365  59.497  1.00 38.59           C  
ANISOU 1552  CB  LEU A  95     5376   4717   4571   -538   -607    424
ATOM   1553  CG  LEU A  95       1.304  64.968  60.438  1.00 41.61           C  
ANISOU 1553  CG  LEU A  95     5636   5078   5097   -587   -621    385
ATOM   1554  CD1 LEU A  95       1.344  63.462  60.766  1.00 33.71           C  
ANISOU 1554  CD1 LEU A  95     4610   4050   4148   -637   -578    346
ATOM   1555  CD2 LEU A  95       1.221  65.812  61.722  1.00 38.28           C  
ANISOU 1555  CD2 LEU A  95     5173   4646   4725   -596   -543    439
ATOM   1556  H   LEU A  95       1.032  66.559  57.585  1.00  0.00           H  
ATOM   1557  HA  LEU A  95       2.712  67.488  59.895  1.00  0.00           H  
ATOM   1558  HB3 LEU A  95       3.413  65.101  59.967  1.00  0.00           H  
ATOM   1559  HB2 LEU A  95       2.393  64.737  58.610  1.00  0.00           H  
ATOM   1560  HG  LEU A  95       0.378  65.147  59.888  1.00  0.00           H  
ATOM   1561 HD11 LEU A  95       0.458  62.956  60.381  1.00  0.00           H  
ATOM   1562 HD12 LEU A  95       2.210  62.963  60.331  1.00  0.00           H  
ATOM   1563 HD13 LEU A  95       1.374  63.276  61.840  1.00  0.00           H  
ATOM   1564 HD21 LEU A  95       0.217  65.766  62.143  1.00  0.00           H  
ATOM   1565 HD22 LEU A  95       1.917  65.463  62.485  1.00  0.00           H  
ATOM   1566 HD23 LEU A  95       1.425  66.864  61.541  1.00  0.00           H  
ATOM   1567  N   LEU A  96       4.647  67.889  58.387  1.00 37.37           N  
ANISOU 1567  N   LEU A  96     5393   4521   4286   -438   -415    594
ATOM   1568  CA  LEU A  96       5.824  68.167  57.572  1.00 40.10           C  
ANISOU 1568  CA  LEU A  96     5835   4818   4584   -386   -296    657
ATOM   1569  C   LEU A  96       6.974  67.254  58.018  1.00 40.93           C  
ANISOU 1569  C   LEU A  96     5908   4900   4745   -444   -225    644
ATOM   1570  O   LEU A  96       7.328  67.255  59.199  1.00 39.91           O  
ANISOU 1570  O   LEU A  96     5675   4763   4725   -511   -225    616
ATOM   1571  CB  LEU A  96       6.212  69.653  57.742  1.00 40.34           C  
ANISOU 1571  CB  LEU A  96     5850   4792   4687   -367   -196    729
ATOM   1572  CG  LEU A  96       7.347  70.158  56.820  1.00 42.98           C  
ANISOU 1572  CG  LEU A  96     6261   5033   5036   -310    -15    814
ATOM   1573  CD1 LEU A  96       6.897  70.279  55.357  1.00 42.33           C  
ANISOU 1573  CD1 LEU A  96     6377   4945   4762   -165     11    866
ATOM   1574  CD2 LEU A  96       7.907  71.498  57.320  1.00 45.24           C  
ANISOU 1574  CD2 LEU A  96     6468   5236   5484   -326     86    861
ATOM   1575  H   LEU A  96       4.635  68.322  59.309  1.00  0.00           H  
ATOM   1576  HA  LEU A  96       5.597  67.982  56.521  1.00  0.00           H  
ATOM   1577  HB3 LEU A  96       6.518  69.792  58.778  1.00  0.00           H  
ATOM   1578  HB2 LEU A  96       5.332  70.282  57.607  1.00  0.00           H  
ATOM   1579  HG  LEU A  96       8.176  69.450  56.855  1.00  0.00           H  
ATOM   1580 HD11 LEU A  96       7.633  70.815  54.760  1.00  0.00           H  
ATOM   1581 HD12 LEU A  96       6.752  69.301  54.898  1.00  0.00           H  
ATOM   1582 HD13 LEU A  96       5.967  70.840  55.273  1.00  0.00           H  
ATOM   1583 HD21 LEU A  96       8.805  71.777  56.769  1.00  0.00           H  
ATOM   1584 HD22 LEU A  96       7.180  72.302  57.202  1.00  0.00           H  
ATOM   1585 HD23 LEU A  96       8.184  71.448  58.373  1.00  0.00           H  
ATOM   1586  N   PHE A  97       7.571  66.554  57.058  1.00 41.59           N  
ANISOU 1586  N   PHE A  97     6096   4965   4742   -395   -170    663
ATOM   1587  CA  PHE A  97       8.758  65.726  57.224  1.00 41.30           C  
ANISOU 1587  CA  PHE A  97     6040   4892   4761   -433    -80    664
ATOM   1588  C   PHE A  97       9.785  66.118  56.148  1.00 44.66           C  
ANISOU 1588  C   PHE A  97     6570   5234   5166   -352     93    752
ATOM   1589  O   PHE A  97       9.438  66.760  55.150  1.00 43.03           O  
ANISOU 1589  O   PHE A  97     6500   5008   4841   -243    133    810
ATOM   1590  CB  PHE A  97       8.378  64.245  57.025  1.00 40.25           C  
ANISOU 1590  CB  PHE A  97     5937   4807   4549   -452   -160    598
ATOM   1591  CG  PHE A  97       7.308  63.674  57.938  1.00 36.78           C  
ANISOU 1591  CG  PHE A  97     5415   4422   4136   -510   -292    524
ATOM   1592  CD1 PHE A  97       5.950  63.728  57.563  1.00 39.86           C  
ANISOU 1592  CD1 PHE A  97     5829   4843   4472   -475   -411    484
ATOM   1593  CD2 PHE A  97       7.649  63.165  59.207  1.00 38.49           C  
ANISOU 1593  CD2 PHE A  97     5537   4643   4445   -580   -289    492
ATOM   1594  CE1 PHE A  97       4.985  63.199  58.406  1.00 38.11           C  
ANISOU 1594  CE1 PHE A  97     5508   4641   4331   -530   -497    422
ATOM   1595  CE2 PHE A  97       6.667  62.645  60.037  1.00 36.05           C  
ANISOU 1595  CE2 PHE A  97     5169   4357   4172   -615   -357    445
ATOM   1596  CZ  PHE A  97       5.339  62.656  59.632  1.00 37.66           C  
ANISOU 1596  CZ  PHE A  97     5367   4577   4366   -601   -447    414
ATOM   1597  H   PHE A  97       7.205  66.592  56.106  1.00  0.00           H  
ATOM   1598  HA  PHE A  97       9.201  65.862  58.211  1.00  0.00           H  
ATOM   1599  HB3 PHE A  97       9.270  63.627  57.139  1.00  0.00           H  
ATOM   1600  HB2 PHE A  97       8.047  64.089  56.000  1.00  0.00           H  
ATOM   1601  HD1 PHE A  97       5.658  64.163  56.616  1.00  0.00           H  
ATOM   1602  HD2 PHE A  97       8.676  63.156  59.528  1.00  0.00           H  
ATOM   1603  HE1 PHE A  97       3.951  63.212  58.108  1.00  0.00           H  
ATOM   1604  HE2 PHE A  97       6.938  62.231  60.998  1.00  0.00           H  
ATOM   1605  HZ  PHE A  97       4.574  62.248  60.276  1.00  0.00           H  
ATOM   1606  N   ASP A  98      11.025  65.659  56.334  1.00 45.95           N  
ANISOU 1606  N   ASP A  98     6678   5336   5446   -388    206    763
ATOM   1607  CA  ASP A  98      12.072  65.593  55.306  1.00 48.08           C  
ANISOU 1607  CA  ASP A  98     7048   5509   5709   -308    404    851
ATOM   1608  C   ASP A  98      11.644  64.588  54.219  1.00 45.80           C  
ANISOU 1608  C   ASP A  98     6944   5268   5189   -224    362    843
ATOM   1609  O   ASP A  98      11.082  63.552  54.574  1.00 45.74           O  
ANISOU 1609  O   ASP A  98     6914   5342   5124   -277    212    754
ATOM   1610  CB  ASP A  98      13.468  65.168  55.850  1.00 50.68           C  
ANISOU 1610  CB  ASP A  98     7242   5751   6262   -371    520    847
ATOM   1611  CG  ASP A  98      13.766  65.485  57.320  1.00 55.71           C  
ANISOU 1611  CG  ASP A  98     7713   6284   7170   -413    596    857
ATOM   1612  OD1 ASP A  98      13.034  64.962  58.191  1.00 60.01           O  
ANISOU 1612  OD1 ASP A  98     8274   6801   7726   -382    628    903
ATOM   1613  OD2 ASP A  98      14.770  66.187  57.562  1.00 63.95           O1-
ANISOU 1613  OD2 ASP A  98     8603   7263   8433   -471    613    805
ATOM   1614  H   ASP A  98      11.250  65.151  57.181  1.00  0.00           H  
ATOM   1615  HA  ASP A  98      12.159  66.583  54.854  1.00  0.00           H  
ATOM   1616  HB3 ASP A  98      14.230  65.659  55.243  1.00  0.00           H  
ATOM   1617  HB2 ASP A  98      13.658  64.102  55.710  1.00  0.00           H  
ATOM   1618  N   TYR A  99      11.897  64.885  52.938  1.00 45.40           N  
ANISOU 1618  N   TYR A  99     7087   5153   5009    -77    501    933
ATOM   1619  CA  TYR A  99      11.520  63.982  51.847  1.00 44.39           C  
ANISOU 1619  CA  TYR A  99     7178   5056   4630     50    440    915
ATOM   1620  C   TYR A  99      12.560  62.864  51.671  1.00 42.16           C  
ANISOU 1620  C   TYR A  99     6923   4741   4355     41    537    919
ATOM   1621  O   TYR A  99      13.728  63.168  51.420  1.00 42.37           O  
ANISOU 1621  O   TYR A  99     6940   4657   4502     58    776   1013
ATOM   1622  CB  TYR A  99      11.367  64.777  50.537  1.00 45.21           C  
ANISOU 1622  CB  TYR A  99     7530   5089   4560    260    567   1019
ATOM   1623  CG  TYR A  99      10.669  64.019  49.425  1.00 47.50           C  
ANISOU 1623  CG  TYR A  99     8087   5407   4555    442    457    980
ATOM   1624  CD1 TYR A  99       9.265  63.911  49.425  1.00 47.68           C  
ANISOU 1624  CD1 TYR A  99     8130   5531   4454    464    154    846
ATOM   1625  CD2 TYR A  99      11.415  63.401  48.405  1.00 50.11           C  
ANISOU 1625  CD2 TYR A  99     8650   5647   4743    609    651   1067
ATOM   1626  CE1 TYR A  99       8.615  63.144  48.444  1.00 47.03           C  
ANISOU 1626  CE1 TYR A  99     8287   5461   4121    648      6    775
ATOM   1627  CE2 TYR A  99      10.761  62.654  47.406  1.00 54.31           C  
ANISOU 1627  CE2 TYR A  99     9459   6198   4978    810    521   1013
ATOM   1628  CZ  TYR A  99       9.364  62.498  47.442  1.00 51.96           C  
ANISOU 1628  CZ  TYR A  99     9169   6005   4570    828    178    855
ATOM   1629  OH  TYR A  99       8.742  61.733  46.500  1.00 58.55           O  
ANISOU 1629  OH  TYR A  99    10266   6845   5135   1039      7    768
ATOM   1630  H   TYR A  99      12.413  65.717  52.682  1.00  0.00           H  
ATOM   1631  HA  TYR A  99      10.553  63.532  52.078  1.00  0.00           H  
ATOM   1632  HB3 TYR A  99      12.337  65.137  50.191  1.00  0.00           H  
ATOM   1633  HB2 TYR A  99      10.775  65.665  50.721  1.00  0.00           H  
ATOM   1634  HD1 TYR A  99       8.680  64.409  50.183  1.00  0.00           H  
ATOM   1635  HD2 TYR A  99      12.491  63.493  48.402  1.00  0.00           H  
ATOM   1636  HE1 TYR A  99       7.540  63.070  48.475  1.00  0.00           H  
ATOM   1637  HE2 TYR A  99      11.341  62.192  46.622  1.00  0.00           H  
ATOM   1638  HH  TYR A  99       9.330  61.451  45.795  1.00  0.00           H  
ATOM   1639  N   ALA A 100      12.113  61.606  51.741  1.00 40.08           N  
ANISOU 1639  N   ALA A 100     6686   4556   3985     17    364    816
ATOM   1640  CA  ALA A 100      12.921  60.438  51.402  1.00 41.57           C  
ANISOU 1640  CA  ALA A 100     6943   4721   4129     33    432    812
ATOM   1641  C   ALA A 100      12.550  59.999  49.981  1.00 42.56           C  
ANISOU 1641  C   ALA A 100     7362   4829   3980    235    416    818
ATOM   1642  O   ALA A 100      11.394  59.650  49.749  1.00 43.09           O  
ANISOU 1642  O   ALA A 100     7498   4963   3910    275    183    705
ATOM   1643  CB  ALA A 100      12.637  59.328  52.419  1.00 37.25           C  
ANISOU 1643  CB  ALA A 100     6244   4255   3654   -114    267    693
ATOM   1644  H   ALA A 100      11.129  61.433  51.924  1.00  0.00           H  
ATOM   1645  HA  ALA A 100      13.983  60.677  51.440  1.00  0.00           H  
ATOM   1646  HB1 ALA A 100      13.222  58.437  52.188  1.00  0.00           H  
ATOM   1647  HB2 ALA A 100      12.900  59.640  53.429  1.00  0.00           H  
ATOM   1648  HB3 ALA A 100      11.582  59.053  52.419  1.00  0.00           H  
ATOM   1649  N   GLU A 101      13.498  60.065  49.039  1.00 43.28           N  
ANISOU 1649  N   GLU A 101     6310   5017   5117    -89    -19   1911
ATOM   1650  CA  GLU A 101      13.230  59.837  47.616  1.00 45.84           C  
ANISOU 1650  CA  GLU A 101     6775   5458   5184   -125    -73   2047
ATOM   1651  C   GLU A 101      12.924  58.384  47.219  1.00 43.30           C  
ANISOU 1651  C   GLU A 101     6455   5322   4674   -112   -125   1924
ATOM   1652  O   GLU A 101      12.280  58.184  46.186  1.00 44.92           O  
ANISOU 1652  O   GLU A 101     6747   5605   4715   -101   -256   2015
ATOM   1653  CB  GLU A 101      14.373  60.399  46.746  1.00 48.97           C  
ANISOU 1653  CB  GLU A 101     7279   5867   5458   -244     90   2137
ATOM   1654  CG  GLU A 101      14.583  61.920  46.892  1.00 53.01           C  
ANISOU 1654  CG  GLU A 101     7978   6459   5704   -296     43   2329
ATOM   1655  CD  GLU A 101      15.430  62.485  45.757  1.00 59.07           C  
ANISOU 1655  CD  GLU A 101     8814   7091   6537   -253   -113   2568
ATOM   1656  OE1 GLU A 101      16.664  62.303  45.800  1.00 61.08           O  
ANISOU 1656  OE1 GLU A 101     9091   7190   6924   -289    -40   2692
ATOM   1657  OE2 GLU A 101      14.821  63.025  44.809  1.00 61.22           O1-
ANISOU 1657  OE2 GLU A 101     9112   7405   6744   -185   -314   2636
ATOM   1658  H   GLU A 101      14.429  60.353  49.283  1.00  0.00           H  
ATOM   1659  HA  GLU A 101      12.325  60.386  47.367  1.00  0.00           H  
ATOM   1660  HB3 GLU A 101      14.168  60.160  45.701  1.00  0.00           H  
ATOM   1661  HB2 GLU A 101      15.301  59.876  46.982  1.00  0.00           H  
ATOM   1662  HG3 GLU A 101      15.040  62.167  47.850  1.00  0.00           H  
ATOM   1663  HG2 GLU A 101      13.624  62.429  46.858  1.00  0.00           H  
ATOM   1664  N   HIS A 102      13.398  57.413  48.006  1.00 43.76           N  
ANISOU 1664  N   HIS A 102     6419   5444   4765   -115    -37   1721
ATOM   1665  CA  HIS A 102      13.319  55.992  47.695  1.00 42.31           C  
ANISOU 1665  CA  HIS A 102     6241   5421   4416   -115    -55   1593
ATOM   1666  C   HIS A 102      12.761  55.221  48.896  1.00 41.92           C  
ANISOU 1666  C   HIS A 102     6060   5377   4491    -39   -124   1437
ATOM   1667  O   HIS A 102      12.546  55.786  49.970  1.00 39.79           O  
ANISOU 1667  O   HIS A 102     5691   4998   4429      9   -132   1400
ATOM   1668  CB  HIS A 102      14.718  55.476  47.282  1.00 43.85           C  
ANISOU 1668  CB  HIS A 102     6454   5698   4508   -196    131   1498
ATOM   1669  CG  HIS A 102      15.300  56.159  46.073  1.00 39.20           C  
ANISOU 1669  CG  HIS A 102     5987   5105   3801   -286    244   1638
ATOM   1670  ND1 HIS A 102      16.279  57.156  46.163  1.00 45.55           N  
ANISOU 1670  ND1 HIS A 102     6958   5984   4367   -325    196   1771
ATOM   1671  CD2 HIS A 102      14.996  55.963  44.744  1.00 42.33           C  
ANISOU 1671  CD2 HIS A 102     6369   5431   4283   -355    403   1672
ATOM   1672  CE1 HIS A 102      16.519  57.517  44.911  1.00 49.39           C  
ANISOU 1672  CE1 HIS A 102     7536   6445   4785   -414    335   1887
ATOM   1673  NE2 HIS A 102      15.794  56.837  44.025  1.00 45.92           N  
ANISOU 1673  NE2 HIS A 102     6980   5914   4552   -433    466   1829
ATOM   1674  H   HIS A 102      13.871  57.630  48.879  1.00  0.00           H  
ATOM   1675  HA  HIS A 102      12.625  55.822  46.869  1.00  0.00           H  
ATOM   1676  HB3 HIS A 102      14.690  54.406  47.074  1.00  0.00           H  
ATOM   1677  HB2 HIS A 102      15.418  55.607  48.107  1.00  0.00           H  
ATOM   1678  HD2 HIS A 102      14.287  55.301  44.266  1.00  0.00           H  
ATOM   1679  HE1 HIS A 102      17.232  58.283  44.643  1.00  0.00           H  
ATOM   1680  HE2 HIS A 102      15.849  56.906  43.010  1.00  0.00           H  
ATOM   1681  N   ASP A 103      12.534  53.927  48.684  1.00 42.35           N  
ANISOU 1681  N   ASP A 103     6125   5556   4410    -35   -164   1342
ATOM   1682  CA  ASP A 103      12.059  52.970  49.675  1.00 41.53           C  
ANISOU 1682  CA  ASP A 103     5909   5474   4396     17   -202   1187
ATOM   1683  C   ASP A 103      12.476  51.583  49.187  1.00 41.01           C  
ANISOU 1683  C   ASP A 103     5881   5542   4159    -13   -181   1075
ATOM   1684  O   ASP A 103      12.750  51.412  47.991  1.00 41.29           O  
ANISOU 1684  O   ASP A 103     6036   5656   3995    -66   -163   1122
ATOM   1685  CB  ASP A 103      10.533  53.036  49.974  1.00 42.04           C  
ANISOU 1685  CB  ASP A 103     5920   5492   4564     92   -367   1235
ATOM   1686  CG  ASP A 103       9.625  53.251  48.767  1.00 43.59           C  
ANISOU 1686  CG  ASP A 103     6206   5751   4605     88   -513   1352
ATOM   1687  OD1 ASP A 103       9.680  52.407  47.851  1.00 50.55           O  
ANISOU 1687  OD1 ASP A 103     7137   6566   5504     98   -586   1522
ATOM   1688  OD2 ASP A 103       8.844  54.226  48.791  1.00 43.32           O1-
ANISOU 1688  OD2 ASP A 103     6201   5830   4430     69   -563   1276
ATOM   1689  H   ASP A 103      12.779  53.496  47.804  1.00  0.00           H  
ATOM   1690  HA  ASP A 103      12.613  53.152  50.596  1.00  0.00           H  
ATOM   1691  HB3 ASP A 103      10.355  53.857  50.660  1.00  0.00           H  
ATOM   1692  HB2 ASP A 103      10.187  52.155  50.516  1.00  0.00           H  
ATOM   1693  N   LEU A 104      12.492  50.612  50.108  1.00 40.21           N  
ANISOU 1693  N   LEU A 104     5688   5460   4132     18   -179    928
ATOM   1694  CA  LEU A 104      12.838  49.225  49.807  1.00 41.29           C  
ANISOU 1694  CA  LEU A 104     5849   5696   4141     -7   -143    807
ATOM   1695  C   LEU A 104      11.908  48.578  48.772  1.00 43.16           C  
ANISOU 1695  C   LEU A 104     6163   6015   4223    -14   -270    819
ATOM   1696  O   LEU A 104      12.391  47.800  47.956  1.00 44.83           O  
ANISOU 1696  O   LEU A 104     6448   6310   4277    -56   -223    744
ATOM   1697  CB  LEU A 104      12.939  48.382  51.093  1.00 38.81           C  
ANISOU 1697  CB  LEU A 104     5425   5369   3953     23   -107    662
ATOM   1698  CG  LEU A 104      14.242  48.584  51.883  1.00 42.30           C  
ANISOU 1698  CG  LEU A 104     5811   5771   4492      5     28    615
ATOM   1699  CD1 LEU A 104      14.274  47.647  53.096  1.00 35.56           C  
ANISOU 1699  CD1 LEU A 104     4870   4918   3725     31     35    484
ATOM   1700  CD2 LEU A 104      15.502  48.372  51.027  1.00 40.06           C  
ANISOU 1700  CD2 LEU A 104     5588   5534   4099    -54    160    622
ATOM   1701  H   LEU A 104      12.206  50.837  51.059  1.00  0.00           H  
ATOM   1702  HA  LEU A 104      13.812  49.255  49.326  1.00  0.00           H  
ATOM   1703  HB3 LEU A 104      12.876  47.326  50.838  1.00  0.00           H  
ATOM   1704  HB2 LEU A 104      12.082  48.576  51.735  1.00  0.00           H  
ATOM   1705  HG  LEU A 104      14.253  49.611  52.255  1.00  0.00           H  
ATOM   1706 HD11 LEU A 104      15.001  48.004  53.820  1.00  0.00           H  
ATOM   1707 HD12 LEU A 104      13.305  47.583  53.591  1.00  0.00           H  
ATOM   1708 HD13 LEU A 104      14.567  46.635  52.813  1.00  0.00           H  
ATOM   1709 HD21 LEU A 104      16.295  47.895  51.602  1.00  0.00           H  
ATOM   1710 HD22 LEU A 104      15.309  47.746  50.157  1.00  0.00           H  
ATOM   1711 HD23 LEU A 104      15.887  49.323  50.663  1.00  0.00           H  
ATOM   1712  N   TRP A 105      10.629  48.972  48.766  1.00 42.60           N  
ANISOU 1712  N   TRP A 105     6070   5915   4203     25   -430    904
ATOM   1713  CA  TRP A 105       9.656  48.611  47.736  1.00 44.32           C  
ANISOU 1713  CA  TRP A 105     6356   6209   4274     10   -584    929
ATOM   1714  C   TRP A 105      10.143  48.958  46.313  1.00 45.15           C  
ANISOU 1714  C   TRP A 105     6635   6385   4137    -60   -567   1018
ATOM   1715  O   TRP A 105      10.245  48.065  45.472  1.00 46.94           O  
ANISOU 1715  O   TRP A 105     6957   6708   4172   -111   -566    942
ATOM   1716  CB  TRP A 105       8.295  49.252  48.079  1.00 46.22           C  
ANISOU 1716  CB  TRP A 105     6520   6394   4648     67   -765   1028
ATOM   1717  CG  TRP A 105       7.188  49.055  47.092  1.00 44.72           C  
ANISOU 1717  CG  TRP A 105     6359   6278   4355     53   -952   1035
ATOM   1718  CD1 TRP A 105       6.946  49.832  46.012  1.00 45.72           C  
ANISOU 1718  CD1 TRP A 105     6398   6428   4544     64  -1026    923
ATOM   1719  CD2 TRP A 105       6.207  47.978  47.041  1.00 50.84           C  
ANISOU 1719  CD2 TRP A 105     7259   7110   4947     16  -1100   1167
ATOM   1720  NE1 TRP A 105       5.873  49.323  45.311  1.00 47.46           N  
ANISOU 1720  NE1 TRP A 105     6669   6716   4645     34  -1216    964
ATOM   1721  CE2 TRP A 105       5.374  48.180  45.899  1.00 50.38           C  
ANISOU 1721  CE2 TRP A 105     7176   7113   4852      5  -1274   1115
ATOM   1722  CE3 TRP A 105       5.932  46.849  47.849  1.00 53.09           C  
ANISOU 1722  CE3 TRP A 105     7684   7399   5088    -17  -1108   1331
ATOM   1723  CZ2 TRP A 105       4.316  47.311  45.581  1.00 56.31           C  
ANISOU 1723  CZ2 TRP A 105     8037   7936   5420    -38  -1473   1215
ATOM   1724  CZ3 TRP A 105       4.875  45.969  47.539  1.00 60.66           C  
ANISOU 1724  CZ3 TRP A 105     8765   8430   5851    -58  -1299   1445
ATOM   1725  CH2 TRP A 105       4.067  46.200  46.408  1.00 57.68           C  
ANISOU 1725  CH2 TRP A 105     8360   8121   5435    -68  -1488   1383
ATOM   1726  H   TRP A 105      10.326  49.595  49.506  1.00  0.00           H  
ATOM   1727  HA  TRP A 105       9.532  47.527  47.765  1.00  0.00           H  
ATOM   1728  HB3 TRP A 105       8.402  50.321  48.241  1.00  0.00           H  
ATOM   1729  HB2 TRP A 105       7.945  48.846  49.026  1.00  0.00           H  
ATOM   1730  HD1 TRP A 105       7.509  50.719  45.757  1.00  0.00           H  
ATOM   1731  HE1 TRP A 105       5.478  49.803  44.497  1.00  0.00           H  
ATOM   1732  HE3 TRP A 105       6.544  46.657  48.718  1.00  0.00           H  
ATOM   1733  HZ2 TRP A 105       3.706  47.483  44.708  1.00  0.00           H  
ATOM   1734  HZ3 TRP A 105       4.687  45.112  48.171  1.00  0.00           H  
ATOM   1735  HH2 TRP A 105       3.260  45.521  46.174  1.00  0.00           H  
ATOM   1736  N   HIS A 106      10.489  50.234  46.084  1.00 47.03           N  
ANISOU 1736  N   HIS A 106     6920   6567   4383    -67   -540   1172
ATOM   1737  CA  HIS A 106      11.010  50.721  44.803  1.00 50.20           C  
ANISOU 1737  CA  HIS A 106     7500   7026   4549   -143   -502   1283
ATOM   1738  C   HIS A 106      12.354  50.091  44.417  1.00 49.69           C  
ANISOU 1738  C   HIS A 106     7497   7020   4364   -209   -274   1174
ATOM   1739  O   HIS A 106      12.528  49.711  43.257  1.00 51.49           O  
ANISOU 1739  O   HIS A 106     7877   7344   4342   -280   -238   1170
ATOM   1740  CB  HIS A 106      11.060  52.264  44.753  1.00 50.36           C  
ANISOU 1740  CB  HIS A 106     7549   6949   4638   -134   -525   1490
ATOM   1741  CG  HIS A 106       9.732  52.902  44.414  1.00 54.16           C  
ANISOU 1741  CG  HIS A 106     8028   7394   5157    -86   -764   1641
ATOM   1742  ND1 HIS A 106       8.735  53.124  45.345  1.00 52.84           N  
ANISOU 1742  ND1 HIS A 106     7700   7116   5261      7   -858   1658
ATOM   1743  CD2 HIS A 106       9.229  53.380  43.224  1.00 58.99           C  
ANISOU 1743  CD2 HIS A 106     8774   8064   5574   -117   -934   1781
ATOM   1744  CE1 HIS A 106       7.692  53.656  44.707  1.00 55.26           C  
ANISOU 1744  CE1 HIS A 106     8021   7407   5568     39  -1072   1804
ATOM   1745  NE2 HIS A 106       7.923  53.839  43.411  1.00 61.56           N  
ANISOU 1745  NE2 HIS A 106     9000   8309   6081    -36  -1138   1888
ATOM   1746  H   HIS A 106      10.429  50.906  46.841  1.00  0.00           H  
ATOM   1747  HA  HIS A 106      10.319  50.398  44.028  1.00  0.00           H  
ATOM   1748  HB3 HIS A 106      11.770  52.591  43.990  1.00  0.00           H  
ATOM   1749  HB2 HIS A 106      11.432  52.670  45.694  1.00  0.00           H  
ATOM   1750  HD1 HIS A 106       8.806  52.952  46.351  1.00  0.00           H  
ATOM   1751  HD2 HIS A 106       9.699  53.414  42.250  1.00  0.00           H  
ATOM   1752  HE1 HIS A 106       6.773  53.941  45.195  1.00  0.00           H  
ATOM   1753  N   ILE A 107      13.253  49.948  45.397  1.00 47.19           N  
ANISOU 1753  N   ILE A 107     7060   6645   4224   -189   -123   1083
ATOM   1754  CA  ILE A 107      14.555  49.307  45.231  1.00 47.31           C  
ANISOU 1754  CA  ILE A 107     7092   6706   4179   -240     91    971
ATOM   1755  C   ILE A 107      14.425  47.817  44.833  1.00 46.92           C  
ANISOU 1755  C   ILE A 107     7070   6747   4010   -249     99    801
ATOM   1756  O   ILE A 107      15.031  47.402  43.844  1.00 47.49           O  
ANISOU 1756  O   ILE A 107     7257   6896   3890   -312    218    753
ATOM   1757  CB  ILE A 107      15.423  49.491  46.516  1.00 45.29           C  
ANISOU 1757  CB  ILE A 107     6681   6366   4162   -214    213    908
ATOM   1758  CG1 ILE A 107      15.837  50.977  46.678  1.00 44.47           C  
ANISOU 1758  CG1 ILE A 107     6578   6170   4148   -234    253   1060
ATOM   1759  CG2 ILE A 107      16.666  48.585  46.633  1.00 47.24           C  
ANISOU 1759  CG2 ILE A 107     6902   6657   4389   -248    407    769
ATOM   1760  CD1 ILE A 107      16.320  51.355  48.087  1.00 42.27           C  
ANISOU 1760  CD1 ILE A 107     6144   5794   4120   -206    309   1006
ATOM   1761  H   ILE A 107      13.025  50.271  46.333  1.00  0.00           H  
ATOM   1762  HA  ILE A 107      15.064  49.809  44.406  1.00  0.00           H  
ATOM   1763  HB  ILE A 107      14.783  49.236  47.359  1.00  0.00           H  
ATOM   1764 HG13 ILE A 107      15.004  51.634  46.427  1.00  0.00           H  
ATOM   1765 HG12 ILE A 107      16.618  51.215  45.956  1.00  0.00           H  
ATOM   1766 HG21 ILE A 107      17.202  48.770  47.563  1.00  0.00           H  
ATOM   1767 HG22 ILE A 107      16.411  47.526  46.637  1.00  0.00           H  
ATOM   1768 HG23 ILE A 107      17.358  48.767  45.811  1.00  0.00           H  
ATOM   1769 HD11 ILE A 107      16.294  52.437  48.227  1.00  0.00           H  
ATOM   1770 HD12 ILE A 107      15.689  50.915  48.859  1.00  0.00           H  
ATOM   1771 HD13 ILE A 107      17.346  51.030  48.260  1.00  0.00           H  
ATOM   1772  N   ILE A 108      13.596  47.046  45.552  1.00 44.85           N  
ANISOU 1772  N   ILE A 108     6710   6470   3861   -191    -17    709
ATOM   1773  CA  ILE A 108      13.435  45.608  45.302  1.00 46.25           C  
ANISOU 1773  CA  ILE A 108     6909   6711   3953   -199    -22    548
ATOM   1774  C   ILE A 108      12.698  45.316  43.980  1.00 50.49           C  
ANISOU 1774  C   ILE A 108     7619   7342   4222   -259   -122    574
ATOM   1775  O   ILE A 108      13.083  44.374  43.287  1.00 52.14           O  
ANISOU 1775  O   ILE A 108     7927   7620   4263   -309    -28    457
ATOM   1776  CB  ILE A 108      12.718  44.882  46.483  1.00 44.68           C  
ANISOU 1776  CB  ILE A 108     6568   6464   3943   -134   -123    460
ATOM   1777  CG1 ILE A 108      13.641  44.841  47.726  1.00 40.31           C  
ANISOU 1777  CG1 ILE A 108     5877   5840   3598    -94     -2    399
ATOM   1778  CG2 ILE A 108      12.203  43.457  46.165  1.00 47.39           C  
ANISOU 1778  CG2 ILE A 108     6951   6861   4193   -151   -166    317
ATOM   1779  CD1 ILE A 108      12.912  44.611  49.062  1.00 36.86           C  
ANISOU 1779  CD1 ILE A 108     5312   5345   3349    -34    -94    353
ATOM   1780  H   ILE A 108      13.028  47.435  46.294  1.00  0.00           H  
ATOM   1781  HA  ILE A 108      14.435  45.179  45.209  1.00  0.00           H  
ATOM   1782  HB  ILE A 108      11.841  45.476  46.741  1.00  0.00           H  
ATOM   1783 HG13 ILE A 108      14.191  45.778  47.811  1.00  0.00           H  
ATOM   1784 HG12 ILE A 108      14.403  44.071  47.591  1.00  0.00           H  
ATOM   1785 HG21 ILE A 108      11.752  42.997  47.037  1.00  0.00           H  
ATOM   1786 HG22 ILE A 108      11.428  43.448  45.400  1.00  0.00           H  
ATOM   1787 HG23 ILE A 108      13.013  42.808  45.833  1.00  0.00           H  
ATOM   1788 HD11 ILE A 108      13.007  45.481  49.708  1.00  0.00           H  
ATOM   1789 HD12 ILE A 108      11.846  44.423  48.931  1.00  0.00           H  
ATOM   1790 HD13 ILE A 108      13.345  43.769  49.602  1.00  0.00           H  
ATOM   1791  N   LYS A 109      11.677  46.130  43.668  1.00 51.00           N  
ANISOU 1791  N   LYS A 109     7725   7406   4246   -255   -310    726
ATOM   1792  CA  LYS A 109      10.906  46.107  42.423  1.00 55.38           C  
ANISOU 1792  CA  LYS A 109     8450   8054   4536   -317   -449    773
ATOM   1793  C   LYS A 109      11.811  46.305  41.194  1.00 56.35           C  
ANISOU 1793  C   LYS A 109     8769   8251   4390   -407   -297    808
ATOM   1794  O   LYS A 109      11.699  45.572  40.212  1.00 57.98           O  
ANISOU 1794  O   LYS A 109     9127   8553   4350   -476   -299    727
ATOM   1795  CB  LYS A 109       9.792  47.180  42.535  1.00 56.69           C  
ANISOU 1795  CB  LYS A 109     8604   8192   4745   -286   -693    958
ATOM   1796  CG  LYS A 109       8.980  47.495  41.261  1.00 63.90           C  
ANISOU 1796  CG  LYS A 109     9596   9185   5499   -321   -923    952
ATOM   1797  CD  LYS A 109       7.832  48.507  41.477  1.00 62.30           C  
ANISOU 1797  CD  LYS A 109     9237   8959   5474   -278  -1012    804
ATOM   1798  CE  LYS A 109       8.255  49.814  42.175  0.00 67.51           C  
ANISOU 1798  CE  LYS A 109     9960   9693   5998   -323  -1252    791
ATOM   1799  NZ  LYS A 109       7.269  50.892  41.996  0.00 66.07           N1+
ANISOU 1799  NZ  LYS A 109     9620   9480   6003   -292  -1328    652
ATOM   1800  H   LYS A 109      11.404  46.838  44.345  1.00  0.00           H  
ATOM   1801  HA  LYS A 109      10.439  45.124  42.340  1.00  0.00           H  
ATOM   1802  HB3 LYS A 109      10.261  48.109  42.861  1.00  0.00           H  
ATOM   1803  HB2 LYS A 109       9.106  46.890  43.333  1.00  0.00           H  
ATOM   1804  HG3 LYS A 109       8.569  46.569  40.857  1.00  0.00           H  
ATOM   1805  HG2 LYS A 109       9.641  47.890  40.489  1.00  0.00           H  
ATOM   1806  HD3 LYS A 109       7.036  48.035  42.055  1.00  0.00           H  
ATOM   1807  HD2 LYS A 109       7.392  48.742  40.506  1.00  0.00           H  
ATOM   1808  HE3 LYS A 109       9.206  50.169  41.775  1.00  0.00           H  
ATOM   1809  HE2 LYS A 109       8.386  49.640  43.243  1.00  0.00           H  
ATOM   1810  HZ1 LYS A 109       7.599  51.733  42.453  1.00  0.00           H  
ATOM   1811  HZ2 LYS A 109       7.140  51.078  41.013  1.00  0.00           H  
ATOM   1812  HZ3 LYS A 109       6.385  50.628  42.408  1.00  0.00           H  
ATOM   1813  N   PHE A 110      12.728  47.269  41.309  1.00 56.29           N  
ANISOU 1813  N   PHE A 110     8758   8195   4433   -413   -157    922
ATOM   1814  CA  PHE A 110      13.743  47.614  40.313  1.00 58.08           C  
ANISOU 1814  CA  PHE A 110     9147   8478   4444   -503     40    958
ATOM   1815  C   PHE A 110      14.723  46.458  40.041  1.00 59.95           C  
ANISOU 1815  C   PHE A 110     9411   8775   4593   -541    256    738
ATOM   1816  O   PHE A 110      15.017  46.200  38.876  1.00 61.90           O  
ANISOU 1816  O   PHE A 110     9847   9116   4554   -627    335    704
ATOM   1817  CB  PHE A 110      14.451  48.923  40.735  1.00 57.40           C  
ANISOU 1817  CB  PHE A 110     8995   8302   4513   -497    173   1089
ATOM   1818  CG  PHE A 110      15.558  49.432  39.826  1.00 61.00           C  
ANISOU 1818  CG  PHE A 110     9611   8805   4761   -598    378   1159
ATOM   1819  CD1 PHE A 110      15.242  50.239  38.712  1.00 62.56           C  
ANISOU 1819  CD1 PHE A 110     9996   9029   4746   -661    296   1370
ATOM   1820  CD2 PHE A 110      16.890  48.996  39.998  1.00 62.72           C  
ANISOU 1820  CD2 PHE A 110     9789   9036   5004   -632    656   1022
ATOM   1821  CE1 PHE A 110      16.247  50.656  37.850  1.00 65.81           C  
ANISOU 1821  CE1 PHE A 110    10569   9484   4951   -766    503   1445
ATOM   1822  CE2 PHE A 110      17.881  49.426  39.125  1.00 64.59           C  
ANISOU 1822  CE2 PHE A 110    10168   9318   5056   -733    874   1083
ATOM   1823  CZ  PHE A 110      17.561  50.260  38.061  1.00 66.56           C  
ANISOU 1823  CZ  PHE A 110    10619   9597   5073   -805    805   1295
ATOM   1824  H   PHE A 110      12.802  47.754  42.194  1.00  0.00           H  
ATOM   1825  HA  PHE A 110      13.220  47.816  39.376  1.00  0.00           H  
ATOM   1826  HB3 PHE A 110      14.859  48.818  41.740  1.00  0.00           H  
ATOM   1827  HB2 PHE A 110      13.705  49.716  40.805  1.00  0.00           H  
ATOM   1828  HD1 PHE A 110      14.222  50.547  38.535  1.00  0.00           H  
ATOM   1829  HD2 PHE A 110      17.144  48.334  40.812  1.00  0.00           H  
ATOM   1830  HE1 PHE A 110      16.006  51.293  37.011  1.00  0.00           H  
ATOM   1831  HE2 PHE A 110      18.903  49.109  39.272  1.00  0.00           H  
ATOM   1832  HZ  PHE A 110      18.337  50.592  37.386  1.00  0.00           H  
ATOM   1833  N   HIS A 111      15.175  45.763  41.102  1.00 59.44           N  
ANISOU 1833  N   HIS A 111     9163   8651   4770   -477    348    590
ATOM   1834  CA  HIS A 111      16.029  44.571  41.012  1.00 62.86           C  
ANISOU 1834  CA  HIS A 111     9591   9116   5178   -492    542    377
ATOM   1835  C   HIS A 111      15.322  43.368  40.375  1.00 66.56           C  
ANISOU 1835  C   HIS A 111    10167   9654   5470   -517    439    237
ATOM   1836  O   HIS A 111      15.935  42.678  39.563  1.00 67.38           O  
ANISOU 1836  O   HIS A 111    10402   9823   5375   -581    587    113
ATOM   1837  CB  HIS A 111      16.554  44.181  42.406  1.00 61.33           C  
ANISOU 1837  CB  HIS A 111     9169   8831   5301   -410    617    275
ATOM   1838  CG  HIS A 111      17.500  45.173  43.024  1.00 61.94           C  
ANISOU 1838  CG  HIS A 111     9141   8845   5547   -403    749    365
ATOM   1839  ND1 HIS A 111      17.511  45.442  44.381  1.00 66.11           N  
ANISOU 1839  ND1 HIS A 111     9511   9284   6324   -339    659    429
ATOM   1840  CD2 HIS A 111      18.487  45.963  42.478  1.00 61.99           C  
ANISOU 1840  CD2 HIS A 111     9180   8863   5509   -462    968    396
ATOM   1841  CE1 HIS A 111      18.451  46.364  44.589  1.00 66.39           C  
ANISOU 1841  CE1 HIS A 111     9486   9276   6462   -361    801    492
ATOM   1842  NE2 HIS A 111      19.096  46.714  43.483  1.00 64.43           N  
ANISOU 1842  NE2 HIS A 111     9344   9087   6051   -435    991    479
ATOM   1843  H   HIS A 111      14.898  46.044  42.033  1.00  0.00           H  
ATOM   1844  HA  HIS A 111      16.882  44.815  40.376  1.00  0.00           H  
ATOM   1845  HB3 HIS A 111      17.090  43.232  42.346  1.00  0.00           H  
ATOM   1846  HB2 HIS A 111      15.723  44.014  43.092  1.00  0.00           H  
ATOM   1847  HD1 HIS A 111      16.906  45.034  45.079  1.00  0.00           H  
ATOM   1848  HD2 HIS A 111      18.806  46.049  41.449  1.00  0.00           H  
ATOM   1849  HE1 HIS A 111      18.672  46.777  45.562  1.00  0.00           H  
ATOM   1850  N   ARG A 112      14.047  43.154  40.740  1.00 68.97           N  
ANISOU 1850  N   ARG A 112    10410   9937   5857   -472    197    249
ATOM   1851  CA  ARG A 112      13.188  42.097  40.208  1.00 72.79           C  
ANISOU 1851  CA  ARG A 112    10982  10476   6200   -503     55    130
ATOM   1852  C   ARG A 112      12.864  42.293  38.713  1.00 77.10           C  
ANISOU 1852  C   ARG A 112    11779  11136   6381   -607     -7    187
ATOM   1853  O   ARG A 112      12.838  41.308  37.976  1.00 79.56           O  
ANISOU 1853  O   ARG A 112    12226  11512   6492   -671     26     30
ATOM   1854  CB  ARG A 112      11.930  42.000  41.098  1.00 72.15           C  
ANISOU 1854  CB  ARG A 112    10766  10345   6303   -440   -197    171
ATOM   1855  CG  ARG A 112      10.938  40.890  40.705  1.00 78.04           C  
ANISOU 1855  CG  ARG A 112    11556  11127   6969   -471   -353     41
ATOM   1856  CD  ARG A 112       9.867  40.648  41.783  1.00 83.29           C  
ANISOU 1856  CD  ARG A 112    12033  11719   7895   -401   -527     49
ATOM   1857  NE  ARG A 112       8.779  39.774  41.312  1.00 93.09           N  
ANISOU 1857  NE  ARG A 112    13317  13000   9054   -446   -738    -13
ATOM   1858  CZ  ARG A 112       8.867  38.470  40.990  1.00100.05           C  
ANISOU 1858  CZ  ARG A 112    14246  13891   9879   -488   -718   -209
ATOM   1859  NH1 ARG A 112      10.022  37.796  41.078  1.00102.48           N  
ANISOU 1859  NH1 ARG A 112    14561  14167  10209   -482   -489   -367
ATOM   1860  NH2 ARG A 112       7.768  37.824  40.581  1.00103.64           N1+
ANISOU 1860  NH2 ARG A 112    14732  14379  10269   -539   -935   -252
ATOM   1861  H   ARG A 112      13.625  43.759  41.432  1.00  0.00           H  
ATOM   1862  HA  ARG A 112      13.737  41.158  40.302  1.00  0.00           H  
ATOM   1863  HB3 ARG A 112      11.406  42.956  41.099  1.00  0.00           H  
ATOM   1864  HB2 ARG A 112      12.252  41.833  42.127  1.00  0.00           H  
ATOM   1865  HG3 ARG A 112      11.538  39.983  40.633  1.00  0.00           H  
ATOM   1866  HG2 ARG A 112      10.492  41.038  39.722  1.00  0.00           H  
ATOM   1867  HD3 ARG A 112       9.499  41.584  42.203  1.00  0.00           H  
ATOM   1868  HD2 ARG A 112      10.314  40.097  42.610  1.00  0.00           H  
ATOM   1869  HE  ARG A 112       7.882  40.224  41.204  1.00  0.00           H  
ATOM   1870 HH12 ARG A 112      10.075  36.804  40.881  1.00  0.00           H  
ATOM   1871 HH11 ARG A 112      10.858  38.268  41.390  1.00  0.00           H  
ATOM   1872 HH22 ARG A 112       7.817  36.844  40.341  1.00  0.00           H  
ATOM   1873 HH21 ARG A 112       6.883  38.304  40.512  1.00  0.00           H  
ATOM   1874  N   ALA A 113      12.669  43.557  38.294  1.00 78.57           N  
ANISOU 1874  N   ALA A 113    12036  11338   6480   -627    -97    412
ATOM   1875  CA  ALA A 113      12.452  43.957  36.903  1.00 82.61           C  
ANISOU 1875  CA  ALA A 113    12804  11956   6626   -732   -155    510
ATOM   1876  C   ALA A 113      13.731  43.907  36.047  1.00 86.10           C  
ANISOU 1876  C   ALA A 113    13408  12458   6846   -817    149    446
ATOM   1877  O   ALA A 113      13.641  43.555  34.872  1.00 89.51           O  
ANISOU 1877  O   ALA A 113    14080  12998   6931   -921    152    417
ATOM   1878  CB  ALA A 113      11.840  45.365  36.876  1.00 82.57           C  
ANISOU 1878  CB  ALA A 113    12817  11929   6627   -720   -339    790
ATOM   1879  H   ALA A 113      12.688  44.309  38.969  1.00  0.00           H  
ATOM   1880  HA  ALA A 113      11.730  43.268  36.460  1.00  0.00           H  
ATOM   1881  HB1 ALA A 113      11.660  45.698  35.853  1.00  0.00           H  
ATOM   1882  HB2 ALA A 113      10.882  45.384  37.397  1.00  0.00           H  
ATOM   1883  HB3 ALA A 113      12.493  46.096  37.355  1.00  0.00           H  
ATOM   1884  N   SER A 114      14.889  44.240  36.648  1.00 85.83           N  
ANISOU 1884  N   SER A 114    13245  12358   7009   -780    401    424
ATOM   1885  CA  SER A 114      16.212  44.193  36.014  1.00 88.08           C  
ANISOU 1885  CA  SER A 114    13639  12686   7141   -855    722    365
ATOM   1886  C   SER A 114      16.702  42.752  35.755  1.00 90.19           C  
ANISOU 1886  C   SER A 114    13965  12999   7305   -885    886     89
ATOM   1887  O   SER A 114      17.442  42.534  34.797  1.00 93.20           O  
ANISOU 1887  O   SER A 114    14567  13473   7371   -989   1032     29
ATOM   1888  CB  SER A 114      17.210  44.994  36.879  1.00 85.95           C  
ANISOU 1888  CB  SER A 114    13175  12322   7161   -804    926    408
ATOM   1889  OG  SER A 114      18.498  45.063  36.298  0.00 92.21           O  
ANISOU 1889  OG  SER A 114    14054  13154   7829   -882   1244    366
ATOM   1890  H   SER A 114      14.873  44.558  37.608  1.00  0.00           H  
ATOM   1891  HA  SER A 114      16.133  44.690  35.045  1.00  0.00           H  
ATOM   1892  HB3 SER A 114      17.298  44.559  37.875  1.00  0.00           H  
ATOM   1893  HB2 SER A 114      16.857  46.017  37.009  1.00  0.00           H  
ATOM   1894  HG  SER A 114      18.852  44.173  36.224  1.00  0.00           H  
ATOM   1895  N   LYS A 115      16.258  41.799  36.596  1.00 89.06           N  
ANISOU 1895  N   LYS A 115    13632  12782   7425   -797    866    -77
ATOM   1896  CA  LYS A 115      16.519  40.360  36.495  1.00 90.21           C  
ANISOU 1896  CA  LYS A 115    13803  12935   7537   -807   1014   -348
ATOM   1897  C   LYS A 115      15.363  39.799  35.683  1.00 92.21           C  
ANISOU 1897  C   LYS A 115    14271  13276   7487   -886    845   -438
ATOM   1898  O   LYS A 115      15.067  38.605  35.673  1.00 90.95           O  
ANISOU 1898  O   LYS A 115    14068  13102   7387   -858    566   -423
ATOM   1899  CB  LYS A 115      16.584  39.736  37.913  1.00 87.63           C  
ANISOU 1899  CB  LYS A 115    13219  12493   7585   -690    999   -468
ATOM   1900  CG  LYS A 115      17.832  40.138  38.722  0.00 90.16           C  
ANISOU 1900  CG  LYS A 115    13324  12727   8204   -619   1171   -421
ATOM   1901  CD  LYS A 115      17.759  39.642  40.175  0.00 87.77           C  
ANISOU 1901  CD  LYS A 115    12794  12317   8239   -511   1129   -528
ATOM   1902  CE  LYS A 115      18.936  40.122  41.035  0.00 86.39           C  
ANISOU 1902  CE  LYS A 115    12410  12064   8350   -448   1269   -479
ATOM   1903  NZ  LYS A 115      18.802  39.659  42.427  0.00 84.32           N1+
ANISOU 1903  NZ  LYS A 115    11943  11700   8395   -348   1213   -566
ATOM   1904  H   LYS A 115      15.674  42.078  37.372  1.00  0.00           H  
ATOM   1905  HA  LYS A 115      17.456  40.163  35.971  1.00  0.00           H  
ATOM   1906  HXT LYS A 115      14.799  40.519  35.089  1.00  0.00           H  
ATOM   1907  HB3 LYS A 115      16.571  38.647  37.847  1.00  0.00           H  
ATOM   1908  HB2 LYS A 115      15.687  40.010  38.473  1.00  0.00           H  
ATOM   1909  HG3 LYS A 115      17.952  41.222  38.712  1.00  0.00           H  
ATOM   1910  HG2 LYS A 115      18.723  39.732  38.241  1.00  0.00           H  
ATOM   1911  HD3 LYS A 115      17.725  38.552  40.180  1.00  0.00           H  
ATOM   1912  HD2 LYS A 115      16.823  39.978  40.625  1.00  0.00           H  
ATOM   1913  HE3 LYS A 115      18.981  41.212  41.038  1.00  0.00           H  
ATOM   1914  HE2 LYS A 115      19.880  39.758  40.628  1.00  0.00           H  
ATOM   1915  HZ1 LYS A 115      18.778  38.649  42.450  1.00  0.00           H  
ATOM   1916  HZ2 LYS A 115      19.584  39.991  42.974  1.00  0.00           H  
ATOM   1917  HZ3 LYS A 115      17.944  40.024  42.820  1.00  0.00           H  
ATOM   1918  N   GLN A 122      21.400  45.799  45.833  1.00 87.24           N  
ANISOU 1918  N   GLN A 122    11821  11864   9461   -322   1183    188
ATOM   1919  CA  GLN A 122      22.458  44.873  46.285  1.00 85.50           C  
ANISOU 1919  CA  GLN A 122    11410  11591   9485   -288   1298     94
ATOM   1920  C   GLN A 122      23.731  45.010  45.400  1.00 86.06           C  
ANISOU 1920  C   GLN A 122    11460  11682   9556   -348   1565     63
ATOM   1921  O   GLN A 122      24.618  44.165  45.527  1.00 87.05           O  
ANISOU 1921  O   GLN A 122    11479  11797   9801   -320   1697    -74
ATOM   1922  CB  GLN A 122      21.919  43.424  46.438  0.00 89.09           C  
ANISOU 1922  CB  GLN A 122    11843  12047   9960   -224   1234    -56
ATOM   1923  CG  GLN A 122      21.633  42.648  45.131  0.00 90.73           C  
ANISOU 1923  CG  GLN A 122    12201  12325   9946   -256   1328   -163
ATOM   1924  CD  GLN A 122      21.205  41.199  45.392  0.00 89.99           C  
ANISOU 1924  CD  GLN A 122    12091  12212   9890   -196   1232   -300
ATOM   1925  OE1 GLN A 122      20.452  40.917  46.320  0.00 91.32           O  
ANISOU 1925  OE1 GLN A 122    12349  12412   9936   -213   1322   -430
ATOM   1926  NE2 GLN A 122      21.665  40.266  44.555  0.00 87.94           N  
ANISOU 1926  NE2 GLN A 122    11724  11892   9797   -133   1058   -275
ATOM   1927  H1  GLN A 122      20.757  45.323  45.215  1.00  0.00           H  
ATOM   1928  H2  GLN A 122      20.844  46.107  46.618  1.00  0.00           H  
ATOM   1929  HA  GLN A 122      22.772  45.220  47.270  1.00  0.00           H  
ATOM   1930  HB3 GLN A 122      21.009  43.449  47.039  1.00  0.00           H  
ATOM   1931  HB2 GLN A 122      22.638  42.853  47.029  1.00  0.00           H  
ATOM   1932  HG3 GLN A 122      22.517  42.644  44.492  1.00  0.00           H  
ATOM   1933  HG2 GLN A 122      20.844  43.147  44.567  1.00  0.00           H  
ATOM   1934 HE22 GLN A 122      21.438  39.295  44.716  1.00  0.00           H  
ATOM   1935 HE21 GLN A 122      22.298  40.515  43.809  1.00  0.00           H  
ATOM   1936  N   LEU A 123      23.837  46.058  44.556  1.00 85.97           N  
ANISOU 1936  N   LEU A 123    11542  11690   9433   -430   1646    195
ATOM   1937  CA  LEU A 123      24.963  46.299  43.647  1.00 87.27           C  
ANISOU 1937  CA  LEU A 123    11722  11885   9553   -509   1923    184
ATOM   1938  C   LEU A 123      26.279  46.666  44.377  1.00 85.77           C  
ANISOU 1938  C   LEU A 123    11293  11628   9667   -502   2053    143
ATOM   1939  O   LEU A 123      27.288  46.026  44.079  1.00 87.61           O  
ANISOU 1939  O   LEU A 123    11427  11868   9994   -489   2232      6
ATOM   1940  CB  LEU A 123      24.573  47.315  42.542  0.00 93.20           C  
ANISOU 1940  CB  LEU A 123    12676  12685  10051   -610   1987    335
ATOM   1941  CG  LEU A 123      23.756  46.721  41.371  0.00 94.77           C  
ANISOU 1941  CG  LEU A 123    13122  12987   9900   -652   1996    313
ATOM   1942  CD1 LEU A 123      22.366  46.205  41.800  0.00 93.21           C  
ANISOU 1942  CD1 LEU A 123    12987  12801   9629   -585   1714    300
ATOM   1943  CD2 LEU A 123      23.647  47.733  40.209  0.00 96.88           C  
ANISOU 1943  CD2 LEU A 123    13586  13294   9928   -762   2068    494
ATOM   1944  H   LEU A 123      23.075  46.720  44.517  1.00  0.00           H  
ATOM   1945  HA  LEU A 123      25.163  45.351  43.145  1.00  0.00           H  
ATOM   1946  HB3 LEU A 123      25.491  47.732  42.124  1.00  0.00           H  
ATOM   1947  HB2 LEU A 123      24.023  48.160  42.954  1.00  0.00           H  
ATOM   1948  HG  LEU A 123      24.313  45.867  40.983  1.00  0.00           H  
ATOM   1949 HD11 LEU A 123      21.619  46.315  41.014  1.00  0.00           H  
ATOM   1950 HD12 LEU A 123      22.408  45.144  42.050  1.00  0.00           H  
ATOM   1951 HD13 LEU A 123      21.989  46.734  42.676  1.00  0.00           H  
ATOM   1952 HD21 LEU A 123      24.021  47.300  39.281  1.00  0.00           H  
ATOM   1953 HD22 LEU A 123      22.621  48.054  40.028  1.00  0.00           H  
ATOM   1954 HD23 LEU A 123      24.227  48.638  40.396  1.00  0.00           H  
ATOM   1955  N   PRO A 124      26.263  47.583  45.378  1.00 82.75           N  
ANISOU 1955  N   PRO A 124    10814  11176   9452   -514   1963    257
ATOM   1956  CA  PRO A 124      27.314  47.633  46.412  1.00 80.80           C  
ANISOU 1956  CA  PRO A 124    10322  10861   9517   -500   2016    210
ATOM   1957  C   PRO A 124      27.195  46.403  47.328  1.00 77.63           C  
ANISOU 1957  C   PRO A 124     9789  10432   9275   -392   1868     87
ATOM   1958  O   PRO A 124      26.092  46.119  47.798  1.00 75.79           O  
ANISOU 1958  O   PRO A 124     9623  10195   8979   -338   1658    102
ATOM   1959  CB  PRO A 124      27.044  48.949  47.177  1.00 79.98           C  
ANISOU 1959  CB  PRO A 124    10194  10687   9507   -543   1910    357
ATOM   1960  CG  PRO A 124      25.994  49.692  46.368  1.00 80.18           C  
ANISOU 1960  CG  PRO A 124    10450  10740   9276   -582   1851    495
ATOM   1961  CD  PRO A 124      25.238  48.586  45.652  1.00 81.78           C  
ANISOU 1961  CD  PRO A 124    10795  11023   9255   -536   1796    426
ATOM   1962  HA  PRO A 124      28.294  47.676  45.933  1.00  0.00           H  
ATOM   1963  HB3 PRO A 124      27.947  49.547  47.298  1.00  0.00           H  
ATOM   1964  HB2 PRO A 124      26.657  48.758  48.179  1.00  0.00           H  
ATOM   1965  HG3 PRO A 124      26.488  50.327  45.631  1.00  0.00           H  
ATOM   1966  HG2 PRO A 124      25.348  50.322  46.977  1.00  0.00           H  
ATOM   1967  HD2 PRO A 124      24.481  48.149  46.304  1.00  0.00           H  
ATOM   1968  HD3 PRO A 124      24.747  48.984  44.769  1.00  0.00           H  
ATOM   1969  N   ARG A 125      28.307  45.678  47.536  1.00 76.23           N  
ANISOU 1969  N   ARG A 125     9425  10232   9308   -361   1981    -25
ATOM   1970  CA  ARG A 125      28.322  44.390  48.244  1.00 73.67           C  
ANISOU 1970  CA  ARG A 125     9000   9882   9109   -258   1876   -145
ATOM   1971  C   ARG A 125      27.827  44.430  49.709  1.00 69.05           C  
ANISOU 1971  C   ARG A 125     8344   9243   8648   -202   1609   -108
ATOM   1972  O   ARG A 125      27.406  43.391  50.215  1.00 69.07           O  
ANISOU 1972  O   ARG A 125     8339   9232   8671   -124   1484   -173
ATOM   1973  CB  ARG A 125      29.710  43.719  48.099  1.00 75.98           C  
ANISOU 1973  CB  ARG A 125     9094  10149   9625   -231   2061   -264
ATOM   1974  CG  ARG A 125      30.862  44.302  48.947  1.00 80.76           C  
ANISOU 1974  CG  ARG A 125     9473  10703  10510   -266   2105   -228
ATOM   1975  CD  ARG A 125      32.171  43.508  48.769  1.00 87.03           C  
ANISOU 1975  CD  ARG A 125    10091  11487  11489   -263   2363   -336
ATOM   1976  NE  ARG A 125      33.135  43.728  49.862  1.00 90.03           N  
ANISOU 1976  NE  ARG A 125    10188  11797  12221   -229   2299   -353
ATOM   1977  CZ  ARG A 125      33.770  44.867  50.188  1.00 93.44           C  
ANISOU 1977  CZ  ARG A 125    10490  12198  12814   -299   2264   -271
ATOM   1978  NH1 ARG A 125      33.598  45.998  49.489  1.00 93.74           N  
ANISOU 1978  NH1 ARG A 125    10653  12256  12709   -404   2300   -158
ATOM   1979  NH2 ARG A 125      34.602  44.865  51.238  1.00 94.11           N1+
ANISOU 1979  NH2 ARG A 125    10315  12225  13218   -265   2180   -298
ATOM   1980  H   ARG A 125      29.176  45.963  47.108  1.00  0.00           H  
ATOM   1981  HA  ARG A 125      27.612  43.752  47.713  1.00  0.00           H  
ATOM   1982  HB3 ARG A 125      30.001  43.706  47.047  1.00  0.00           H  
ATOM   1983  HB2 ARG A 125      29.592  42.671  48.379  1.00  0.00           H  
ATOM   1984  HG3 ARG A 125      30.617  44.390  50.001  1.00  0.00           H  
ATOM   1985  HG2 ARG A 125      31.019  45.320  48.590  1.00  0.00           H  
ATOM   1986  HD3 ARG A 125      32.681  43.870  47.877  1.00  0.00           H  
ATOM   1987  HD2 ARG A 125      31.983  42.447  48.603  1.00  0.00           H  
ATOM   1988  HE  ARG A 125      33.320  42.920  50.441  1.00  0.00           H  
ATOM   1989 HH12 ARG A 125      34.088  46.842  49.749  1.00  0.00           H  
ATOM   1990 HH11 ARG A 125      32.984  46.005  48.689  1.00  0.00           H  
ATOM   1991 HH22 ARG A 125      35.093  45.702  51.514  1.00  0.00           H  
ATOM   1992 HH21 ARG A 125      34.752  44.017  51.782  1.00  0.00           H  
ATOM   1993  N   GLY A 126      27.873  45.610  50.352  1.00 64.03           N  
ANISOU 1993  N   GLY A 126     7671   8574   8085   -249   1532     -6
ATOM   1994  CA  GLY A 126      27.441  45.816  51.733  1.00 58.52           C  
ANISOU 1994  CA  GLY A 126     6942   7829   7463   -214   1297     30
ATOM   1995  C   GLY A 126      26.052  46.460  51.838  1.00 52.58           C  
ANISOU 1995  C   GLY A 126     6363   7084   6530   -219   1161    116
ATOM   1996  O   GLY A 126      25.636  46.737  52.960  1.00 50.88           O  
ANISOU 1996  O   GLY A 126     6126   6826   6380   -205   1001    147
ATOM   1997  H   GLY A 126      28.221  46.420  49.859  1.00  0.00           H  
ATOM   1998  HA3 GLY A 126      28.166  46.462  52.228  1.00  0.00           H  
ATOM   1999  HA2 GLY A 126      27.420  44.881  52.294  1.00  0.00           H  
ATOM   2000  N   MET A 127      25.343  46.720  50.720  1.00 48.37           N  
ANISOU 2000  N   MET A 127     6000   6603   5775   -239   1217    152
ATOM   2001  CA  MET A 127      24.063  47.440  50.695  1.00 46.02           C  
ANISOU 2001  CA  MET A 127     5847   6304   5333   -243   1084    251
ATOM   2002  C   MET A 127      22.925  46.768  51.488  1.00 41.15           C  
ANISOU 2002  C   MET A 127     5249   5683   4705   -169    898    211
ATOM   2003  O   MET A 127      22.267  47.456  52.267  1.00 42.00           O  
ANISOU 2003  O   MET A 127     5358   5748   4853   -156    767    263
ATOM   2004  CB  MET A 127      23.670  47.784  49.237  1.00 48.51           C  
ANISOU 2004  CB  MET A 127     6343   6681   5408   -288   1163    315
ATOM   2005  CG  MET A 127      22.265  48.390  49.084  1.00 48.10           C  
ANISOU 2005  CG  MET A 127     6417   6612   5246   -290   1016    442
ATOM   2006  SD  MET A 127      21.901  49.203  47.511  1.00 52.11           S  
ANISOU 2006  SD  MET A 127     7148   7191   5461   -347   1061    548
ATOM   2007  CE  MET A 127      20.178  49.653  47.851  1.00 53.80           C  
ANISOU 2007  CE  MET A 127     7432   7366   5644   -301    817    659
ATOM   2008  H   MET A 127      25.723  46.461  49.819  1.00  0.00           H  
ATOM   2009  HA  MET A 127      24.247  48.389  51.201  1.00  0.00           H  
ATOM   2010  HB3 MET A 127      23.714  46.880  48.631  1.00  0.00           H  
ATOM   2011  HB2 MET A 127      24.406  48.466  48.812  1.00  0.00           H  
ATOM   2012  HG3 MET A 127      22.096  49.125  49.871  1.00  0.00           H  
ATOM   2013  HG2 MET A 127      21.524  47.600  49.209  1.00  0.00           H  
ATOM   2014  HE1 MET A 127      19.749  50.196  47.012  1.00  0.00           H  
ATOM   2015  HE2 MET A 127      19.579  48.759  48.023  1.00  0.00           H  
ATOM   2016  HE3 MET A 127      20.116  50.288  48.736  1.00  0.00           H  
ATOM   2017  N   VAL A 128      22.725  45.452  51.295  1.00 41.42           N  
ANISOU 2017  N   VAL A 128     5297   5754   4688   -124    903    116
ATOM   2018  CA  VAL A 128      21.694  44.660  51.980  1.00 41.07           C  
ANISOU 2018  CA  VAL A 128     5264   5701   4640    -62    744     75
ATOM   2019  C   VAL A 128      21.931  44.555  53.502  1.00 39.77           C  
ANISOU 2019  C   VAL A 128     4974   5476   4660    -31    645     64
ATOM   2020  O   VAL A 128      20.969  44.616  54.269  1.00 37.51           O  
ANISOU 2020  O   VAL A 128     4713   5168   4373    -11    510     95
ATOM   2021  CB  VAL A 128      21.586  43.228  51.374  1.00 41.76           C  
ANISOU 2021  CB  VAL A 128     5373   5818   4678    -27    784    -39
ATOM   2022  CG1 VAL A 128      20.722  42.230  52.177  1.00 39.07           C  
ANISOU 2022  CG1 VAL A 128     5023   5450   4372     30    628    -76
ATOM   2023  CG2 VAL A 128      21.095  43.292  49.917  1.00 44.70           C  
ANISOU 2023  CG2 VAL A 128     5900   6258   4824    -67    857    -40
ATOM   2024  H   VAL A 128      23.308  44.954  50.638  1.00  0.00           H  
ATOM   2025  HA  VAL A 128      20.738  45.167  51.834  1.00  0.00           H  
ATOM   2026  HB  VAL A 128      22.590  42.802  51.338  1.00  0.00           H  
ATOM   2027 HG11 VAL A 128      20.505  41.331  51.600  1.00  0.00           H  
ATOM   2028 HG12 VAL A 128      21.227  41.908  53.087  1.00  0.00           H  
ATOM   2029 HG13 VAL A 128      19.769  42.669  52.469  1.00  0.00           H  
ATOM   2030 HG21 VAL A 128      21.019  42.298  49.475  1.00  0.00           H  
ATOM   2031 HG22 VAL A 128      20.115  43.763  49.845  1.00  0.00           H  
ATOM   2032 HG23 VAL A 128      21.781  43.869  49.299  1.00  0.00           H  
ATOM   2033  N   LYS A 129      23.210  44.447  53.900  1.00 38.86           N  
ANISOU 2033  N   LYS A 129     4726   5338   4703    -32    713     21
ATOM   2034  CA  LYS A 129      23.655  44.427  55.291  1.00 37.25           C  
ANISOU 2034  CA  LYS A 129     4404   5082   4665    -13    605     13
ATOM   2035  C   LYS A 129      23.477  45.793  55.980  1.00 37.20           C  
ANISOU 2035  C   LYS A 129     4411   5044   4680    -58    535     87
ATOM   2036  O   LYS A 129      23.034  45.832  57.126  1.00 35.31           O  
ANISOU 2036  O   LYS A 129     4172   4776   4468    -41    404     90
ATOM   2037  CB  LYS A 129      25.119  43.944  55.318  1.00 38.06           C  
ANISOU 2037  CB  LYS A 129     4344   5165   4950    -11    685    -36
ATOM   2038  CG  LYS A 129      25.706  43.774  56.729  1.00 40.51           C  
ANISOU 2038  CG  LYS A 129     4535   5429   5426      6    543    -40
ATOM   2039  CD  LYS A 129      27.187  43.385  56.739  1.00 41.74           C  
ANISOU 2039  CD  LYS A 129     4505   5563   5792      7    607    -78
ATOM   2040  CE  LYS A 129      27.491  42.051  56.038  1.00 42.04           C  
ANISOU 2040  CE  LYS A 129     4486   5594   5891     80    671   -155
ATOM   2041  NZ  LYS A 129      28.850  41.566  56.322  1.00 40.85           N1+
ANISOU 2041  NZ  LYS A 129     4123   5405   5992    102    701   -190
ATOM   2042  H   LYS A 129      23.939  44.421  53.202  1.00  0.00           H  
ATOM   2043  HA  LYS A 129      23.046  43.696  55.828  1.00  0.00           H  
ATOM   2044  HB3 LYS A 129      25.744  44.636  54.751  1.00  0.00           H  
ATOM   2045  HB2 LYS A 129      25.176  42.989  54.796  1.00  0.00           H  
ATOM   2046  HG3 LYS A 129      25.132  43.031  57.278  1.00  0.00           H  
ATOM   2047  HG2 LYS A 129      25.604  44.705  57.283  1.00  0.00           H  
ATOM   2048  HD3 LYS A 129      27.543  43.354  57.768  1.00  0.00           H  
ATOM   2049  HD2 LYS A 129      27.729  44.195  56.255  1.00  0.00           H  
ATOM   2050  HE3 LYS A 129      27.364  42.141  54.959  1.00  0.00           H  
ATOM   2051  HE2 LYS A 129      26.801  41.293  56.390  1.00  0.00           H  
ATOM   2052  HZ1 LYS A 129      29.525  42.275  56.063  1.00  0.00           H  
ATOM   2053  HZ2 LYS A 129      28.932  41.382  57.315  1.00  0.00           H  
ATOM   2054  HZ3 LYS A 129      29.031  40.712  55.813  1.00  0.00           H  
ATOM   2055  N   SER A 130      23.802  46.883  55.263  1.00 36.63           N  
ANISOU 2055  N   SER A 130     4351   4967   4598   -119    634    144
ATOM   2056  CA  SER A 130      23.673  48.264  55.733  1.00 36.83           C  
ANISOU 2056  CA  SER A 130     4392   4941   4660   -165    582    209
ATOM   2057  C   SER A 130      22.205  48.677  55.938  1.00 35.82           C  
ANISOU 2057  C   SER A 130     4386   4802   4421   -139    482    253
ATOM   2058  O   SER A 130      21.907  49.345  56.928  1.00 35.95           O  
ANISOU 2058  O   SER A 130     4401   4768   4491   -143    391    259
ATOM   2059  CB  SER A 130      24.370  49.216  54.744  1.00 39.19           C  
ANISOU 2059  CB  SER A 130     4689   5225   4975   -240    720    273
ATOM   2060  OG  SER A 130      25.763  49.004  54.741  1.00 38.44           O  
ANISOU 2060  OG  SER A 130     4457   5138   5010   -267    828    226
ATOM   2061  H   SER A 130      24.170  46.768  54.328  1.00  0.00           H  
ATOM   2062  HA  SER A 130      24.175  48.343  56.700  1.00  0.00           H  
ATOM   2063  HB3 SER A 130      24.206  50.251  55.036  1.00  0.00           H  
ATOM   2064  HB2 SER A 130      23.980  49.098  53.732  1.00  0.00           H  
ATOM   2065  HG  SER A 130      25.945  48.210  54.228  1.00  0.00           H  
ATOM   2066  N   LEU A 131      21.321  48.235  55.025  1.00 34.15           N  
ANISOU 2066  N   LEU A 131     4277   4637   4062   -116    500    277
ATOM   2067  CA  LEU A 131      19.866  48.370  55.114  1.00 34.28           C  
ANISOU 2067  CA  LEU A 131     4383   4646   3995    -82    396    315
ATOM   2068  C   LEU A 131      19.299  47.638  56.338  1.00 34.84           C  
ANISOU 2068  C   LEU A 131     4420   4708   4111    -35    287    250
ATOM   2069  O   LEU A 131      18.575  48.265  57.107  1.00 36.14           O  
ANISOU 2069  O   LEU A 131     4597   4828   4307    -27    214    266
ATOM   2070  CB  LEU A 131      19.209  47.854  53.813  1.00 34.77           C  
ANISOU 2070  CB  LEU A 131     4547   4771   3893    -70    411    339
ATOM   2071  CG  LEU A 131      19.235  48.880  52.661  1.00 34.40           C  
ANISOU 2071  CG  LEU A 131     4588   4735   3748   -118    485    439
ATOM   2072  CD1 LEU A 131      19.116  48.192  51.287  1.00 36.04           C  
ANISOU 2072  CD1 LEU A 131     4899   5023   3770   -117    500    433
ATOM   2073  CD2 LEU A 131      18.176  49.988  52.863  1.00 31.44           C  
ANISOU 2073  CD2 LEU A 131     4253   4291   3400   -118    407    545
ATOM   2074  H   LEU A 131      21.661  47.715  54.226  1.00  0.00           H  
ATOM   2075  HA  LEU A 131      19.635  49.431  55.234  1.00  0.00           H  
ATOM   2076  HB3 LEU A 131      18.173  47.558  53.989  1.00  0.00           H  
ATOM   2077  HB2 LEU A 131      19.719  46.939  53.511  1.00  0.00           H  
ATOM   2078  HG  LEU A 131      20.214  49.360  52.671  1.00  0.00           H  
ATOM   2079 HD11 LEU A 131      18.360  48.635  50.641  1.00  0.00           H  
ATOM   2080 HD12 LEU A 131      20.057  48.273  50.752  1.00  0.00           H  
ATOM   2081 HD13 LEU A 131      18.893  47.129  51.376  1.00  0.00           H  
ATOM   2082 HD21 LEU A 131      17.503  50.093  52.015  1.00  0.00           H  
ATOM   2083 HD22 LEU A 131      17.551  49.802  53.737  1.00  0.00           H  
ATOM   2084 HD23 LEU A 131      18.643  50.960  53.005  1.00  0.00           H  
ATOM   2085  N   LEU A 132      19.666  46.355  56.516  1.00 35.69           N  
ANISOU 2085  N   LEU A 132     4489   4848   4225     -6    286    178
ATOM   2086  CA  LEU A 132      19.241  45.520  57.644  1.00 35.38           C  
ANISOU 2086  CA  LEU A 132     4425   4795   4224     31    189    131
ATOM   2087  C   LEU A 132      19.670  46.081  59.012  1.00 35.38           C  
ANISOU 2087  C   LEU A 132     4375   4748   4321      9    132    128
ATOM   2088  O   LEU A 132      18.848  46.083  59.926  1.00 33.10           O  
ANISOU 2088  O   LEU A 132     4118   4438   4021     20     58    124
ATOM   2089  CB  LEU A 132      19.727  44.066  57.437  1.00 35.61           C  
ANISOU 2089  CB  LEU A 132     4409   4844   4277     63    202     63
ATOM   2090  CG  LEU A 132      19.364  43.075  58.574  1.00 36.05           C  
ANISOU 2090  CG  LEU A 132     4448   4878   4373     97    102     32
ATOM   2091  CD1 LEU A 132      17.839  42.900  58.738  1.00 31.01           C  
ANISOU 2091  CD1 LEU A 132     3886   4240   3656    108     38     49
ATOM   2092  CD2 LEU A 132      20.106  41.739  58.401  1.00 37.22           C  
ANISOU 2092  CD2 LEU A 132     4552   5025   4563    134    123    -27
ATOM   2093  H   LEU A 132      20.268  45.910  55.837  1.00  0.00           H  
ATOM   2094  HA  LEU A 132      18.149  45.515  57.628  1.00  0.00           H  
ATOM   2095  HB3 LEU A 132      20.813  44.080  57.326  1.00  0.00           H  
ATOM   2096  HB2 LEU A 132      19.339  43.684  56.492  1.00  0.00           H  
ATOM   2097  HG  LEU A 132      19.721  43.475  59.519  1.00  0.00           H  
ATOM   2098 HD11 LEU A 132      17.537  41.858  58.841  1.00  0.00           H  
ATOM   2099 HD12 LEU A 132      17.492  43.417  59.633  1.00  0.00           H  
ATOM   2100 HD13 LEU A 132      17.286  43.313  57.894  1.00  0.00           H  
ATOM   2101 HD21 LEU A 132      19.462  40.877  58.556  1.00  0.00           H  
ATOM   2102 HD22 LEU A 132      20.549  41.650  57.411  1.00  0.00           H  
ATOM   2103 HD23 LEU A 132      20.920  41.646  59.118  1.00  0.00           H  
ATOM   2104  N   TYR A 133      20.925  46.553  59.125  1.00 34.21           N  
ANISOU 2104  N   TYR A 133     4148   4583   4266    -27    171    124
ATOM   2105  CA  TYR A 133      21.469  47.122  60.360  1.00 34.39           C  
ANISOU 2105  CA  TYR A 133     4125   4565   4379    -61    100    110
ATOM   2106  C   TYR A 133      20.735  48.400  60.799  1.00 35.89           C  
ANISOU 2106  C   TYR A 133     4381   4707   4547    -90     79    136
ATOM   2107  O   TYR A 133      20.427  48.532  61.981  1.00 31.13           O  
ANISOU 2107  O   TYR A 133     3800   4078   3949    -99      3    106
ATOM   2108  CB  TYR A 133      22.986  47.370  60.227  1.00 37.05           C  
ANISOU 2108  CB  TYR A 133     4345   4889   4842   -105    139    101
ATOM   2109  CG  TYR A 133      23.643  47.767  61.540  1.00 38.12           C  
ANISOU 2109  CG  TYR A 133     4432   4990   5063   -145     31     75
ATOM   2110  CD1 TYR A 133      23.929  46.777  62.501  1.00 35.60           C  
ANISOU 2110  CD1 TYR A 133     4058   4682   4787   -122    -74     45
ATOM   2111  CD2 TYR A 133      23.906  49.122  61.834  1.00 40.13           C  
ANISOU 2111  CD2 TYR A 133     4705   5193   5348   -211     23     83
ATOM   2112  CE1 TYR A 133      24.465  47.133  63.752  1.00 38.32           C  
ANISOU 2112  CE1 TYR A 133     4374   5003   5182   -168   -197     26
ATOM   2113  CE2 TYR A 133      24.432  49.481  63.090  1.00 42.96           C  
ANISOU 2113  CE2 TYR A 133     5036   5523   5765   -260    -86     44
ATOM   2114  CZ  TYR A 133      24.709  48.488  64.051  1.00 43.86           C  
ANISOU 2114  CZ  TYR A 133     5103   5664   5898   -241   -202     17
ATOM   2115  OH  TYR A 133      25.206  48.838  65.272  1.00 51.38           O  
ANISOU 2115  OH  TYR A 133     6043   6597   6882   -299   -330    -16
ATOM   2116  H   TYR A 133      21.554  46.507  58.333  1.00  0.00           H  
ATOM   2117  HA  TYR A 133      21.321  46.375  61.142  1.00  0.00           H  
ATOM   2118  HB3 TYR A 133      23.184  48.132  59.471  1.00  0.00           H  
ATOM   2119  HB2 TYR A 133      23.481  46.468  59.871  1.00  0.00           H  
ATOM   2120  HD1 TYR A 133      23.717  45.742  62.288  1.00  0.00           H  
ATOM   2121  HD2 TYR A 133      23.679  49.890  61.109  1.00  0.00           H  
ATOM   2122  HE1 TYR A 133      24.675  46.365  64.482  1.00  0.00           H  
ATOM   2123  HE2 TYR A 133      24.615  50.521  63.319  1.00  0.00           H  
ATOM   2124  HH  TYR A 133      25.368  48.084  65.844  1.00  0.00           H  
ATOM   2125  N   GLN A 134      20.453  49.295  59.837  1.00 35.18           N  
ANISOU 2125  N   GLN A 134     4331   4600   4436   -107    152    192
ATOM   2126  CA  GLN A 134      19.729  50.545  60.063  1.00 36.14           C  
ANISOU 2126  CA  GLN A 134     4510   4655   4568   -125    144    223
ATOM   2127  C   GLN A 134      18.229  50.349  60.348  1.00 35.02           C  
ANISOU 2127  C   GLN A 134     4435   4511   4361    -72     95    222
ATOM   2128  O   GLN A 134      17.675  51.111  61.139  1.00 36.95           O  
ANISOU 2128  O   GLN A 134     4705   4697   4637    -77     69    201
ATOM   2129  CB  GLN A 134      19.959  51.491  58.875  1.00 37.45           C  
ANISOU 2129  CB  GLN A 134     4700   4791   4740   -155    228    305
ATOM   2130  CG  GLN A 134      21.391  52.053  58.811  1.00 37.46           C  
ANISOU 2130  CG  GLN A 134     4623   4773   4837   -226    295    307
ATOM   2131  CD  GLN A 134      21.590  52.996  57.622  1.00 37.89           C  
ANISOU 2131  CD  GLN A 134     4715   4782   4901   -272    388    402
ATOM   2132  OE1 GLN A 134      20.786  53.896  57.389  1.00 35.34           O  
ANISOU 2132  OE1 GLN A 134     4468   4398   4562   -261    374    464
ATOM   2133  NE2 GLN A 134      22.684  52.817  56.881  1.00 40.40           N  
ANISOU 2133  NE2 GLN A 134     4972   5117   5260   -325    488    418
ATOM   2134  H   GLN A 134      20.741  49.113  58.885  1.00  0.00           H  
ATOM   2135  HA  GLN A 134      20.155  51.019  60.950  1.00  0.00           H  
ATOM   2136  HB3 GLN A 134      19.266  52.323  58.965  1.00  0.00           H  
ATOM   2137  HB2 GLN A 134      19.714  50.982  57.941  1.00  0.00           H  
ATOM   2138  HG3 GLN A 134      22.117  51.241  58.764  1.00  0.00           H  
ATOM   2139  HG2 GLN A 134      21.610  52.609  59.723  1.00  0.00           H  
ATOM   2140 HE22 GLN A 134      22.876  53.441  56.110  1.00  0.00           H  
ATOM   2141 HE21 GLN A 134      23.337  52.075  57.089  1.00  0.00           H  
ATOM   2142  N   ILE A 135      17.611  49.313  59.750  1.00 34.02           N  
ANISOU 2142  N   ILE A 135     4329   4442   4153    -26     88    233
ATOM   2143  CA  ILE A 135      16.251  48.865  60.067  1.00 32.42           C  
ANISOU 2143  CA  ILE A 135     4163   4244   3911     19     39    223
ATOM   2144  C   ILE A 135      16.150  48.346  61.517  1.00 33.29           C  
ANISOU 2144  C   ILE A 135     4264   4348   4037     16     -7    155
ATOM   2145  O   ILE A 135      15.242  48.760  62.234  1.00 30.92           O  
ANISOU 2145  O   ILE A 135     3991   4011   3745     24    -19    138
ATOM   2146  CB  ILE A 135      15.743  47.775  59.072  1.00 31.89           C  
ANISOU 2146  CB  ILE A 135     4115   4243   3760     54     30    235
ATOM   2147  CG1 ILE A 135      15.457  48.385  57.682  1.00 33.24           C  
ANISOU 2147  CG1 ILE A 135     4328   4424   3878     51     58    314
ATOM   2148  CG2 ILE A 135      14.505  46.973  59.536  1.00 32.82           C  
ANISOU 2148  CG2 ILE A 135     4245   4363   3863     89    -24    215
ATOM   2149  CD1 ILE A 135      15.436  47.349  56.544  1.00 32.19           C  
ANISOU 2149  CD1 ILE A 135     4228   4367   3638     63     57    309
ATOM   2150  H   ILE A 135      18.122  48.745  59.087  1.00  0.00           H  
ATOM   2151  HA  ILE A 135      15.594  49.732  59.978  1.00  0.00           H  
ATOM   2152  HB  ILE A 135      16.554  47.058  58.947  1.00  0.00           H  
ATOM   2153 HG13 ILE A 135      16.199  49.144  57.439  1.00  0.00           H  
ATOM   2154 HG12 ILE A 135      14.507  48.918  57.709  1.00  0.00           H  
ATOM   2155 HG21 ILE A 135      14.161  46.287  58.762  1.00  0.00           H  
ATOM   2156 HG22 ILE A 135      14.721  46.360  60.411  1.00  0.00           H  
ATOM   2157 HG23 ILE A 135      13.673  47.633  59.782  1.00  0.00           H  
ATOM   2158 HD11 ILE A 135      16.092  47.657  55.730  1.00  0.00           H  
ATOM   2159 HD12 ILE A 135      15.770  46.364  56.870  1.00  0.00           H  
ATOM   2160 HD13 ILE A 135      14.431  47.236  56.138  1.00  0.00           H  
ATOM   2161  N   LEU A 136      17.109  47.501  61.931  1.00 35.25           N  
ANISOU 2161  N   LEU A 136     4473   4627   4292      5    -30    120
ATOM   2162  CA  LEU A 136      17.227  46.978  63.294  1.00 33.85           C  
ANISOU 2162  CA  LEU A 136     4302   4446   4113     -7    -91     74
ATOM   2163  C   LEU A 136      17.509  48.069  64.342  1.00 34.13           C  
ANISOU 2163  C   LEU A 136     4356   4432   4180    -57   -106     45
ATOM   2164  O   LEU A 136      16.989  47.955  65.448  1.00 33.58           O  
ANISOU 2164  O   LEU A 136     4337   4349   4074    -69   -132      9
ATOM   2165  CB  LEU A 136      18.328  45.899  63.344  1.00 35.50           C  
ANISOU 2165  CB  LEU A 136     4455   4686   4348     -4   -130     60
ATOM   2166  CG  LEU A 136      17.923  44.546  62.730  1.00 34.09           C  
ANISOU 2166  CG  LEU A 136     4269   4541   4141     44   -122     62
ATOM   2167  CD1 LEU A 136      19.169  43.686  62.466  1.00 29.48           C  
ANISOU 2167  CD1 LEU A 136     3607   3967   3629     54   -135     48
ATOM   2168  CD2 LEU A 136      16.906  43.798  63.615  1.00 31.49           C  
ANISOU 2168  CD2 LEU A 136     3992   4212   3761     61   -164     54
ATOM   2169  H   LEU A 136      17.824  47.203  61.279  1.00  0.00           H  
ATOM   2170  HA  LEU A 136      16.272  46.522  63.559  1.00  0.00           H  
ATOM   2171  HB3 LEU A 136      18.617  45.722  64.379  1.00  0.00           H  
ATOM   2172  HB2 LEU A 136      19.223  46.282  62.851  1.00  0.00           H  
ATOM   2173  HG  LEU A 136      17.455  44.728  61.763  1.00  0.00           H  
ATOM   2174 HD11 LEU A 136      18.912  42.762  61.946  1.00  0.00           H  
ATOM   2175 HD12 LEU A 136      19.890  44.220  61.847  1.00  0.00           H  
ATOM   2176 HD13 LEU A 136      19.672  43.422  63.396  1.00  0.00           H  
ATOM   2177 HD21 LEU A 136      17.121  42.731  63.678  1.00  0.00           H  
ATOM   2178 HD22 LEU A 136      16.891  44.187  64.632  1.00  0.00           H  
ATOM   2179 HD23 LEU A 136      15.895  43.899  63.225  1.00  0.00           H  
ATOM   2180  N   ASP A 137      18.293  49.099  63.978  1.00 33.29           N  
ANISOU 2180  N   ASP A 137     4216   4295   4139    -95    -81     55
ATOM   2181  CA  ASP A 137      18.646  50.242  64.825  1.00 33.88           C  
ANISOU 2181  CA  ASP A 137     4307   4309   4257   -154    -94     17
ATOM   2182  C   ASP A 137      17.431  51.163  65.068  1.00 34.51           C  
ANISOU 2182  C   ASP A 137     4456   4326   4329   -142    -52      4
ATOM   2183  O   ASP A 137      17.218  51.593  66.202  1.00 34.97           O  
ANISOU 2183  O   ASP A 137     4566   4352   4371   -173    -68    -62
ATOM   2184  CB  ASP A 137      19.852  51.007  64.218  1.00 36.39           C  
ANISOU 2184  CB  ASP A 137     4562   4597   4667   -201    -62     40
ATOM   2185  CG  ASP A 137      20.533  52.043  65.124  1.00 36.15           C  
ANISOU 2185  CG  ASP A 137     4521   4518   4698   -280   -111    -17
ATOM   2186  OD1 ASP A 137      20.217  52.094  66.333  1.00 38.87           O  
ANISOU 2186  OD1 ASP A 137     4927   4848   4992   -301   -165    -78
ATOM   2187  OD2 ASP A 137      21.402  52.761  64.584  1.00 39.02           O1-
ANISOU 2187  OD2 ASP A 137     4816   4853   5155   -331    -89     -3
ATOM   2188  H   ASP A 137      18.708  49.095  63.055  1.00  0.00           H  
ATOM   2189  HA  ASP A 137      18.950  49.841  65.793  1.00  0.00           H  
ATOM   2190  HB3 ASP A 137      19.522  51.518  63.312  1.00  0.00           H  
ATOM   2191  HB2 ASP A 137      20.617  50.287  63.933  1.00  0.00           H  
ATOM   2192  N   GLY A 138      16.634  51.416  64.014  1.00 35.04           N  
ANISOU 2192  N   GLY A 138     4527   4377   4408    -97      1     63
ATOM   2193  CA  GLY A 138      15.428  52.241  64.083  1.00 34.69           C  
ANISOU 2193  CA  GLY A 138     4524   4267   4391    -67     38     61
ATOM   2194  C   GLY A 138      14.302  51.534  64.853  1.00 34.61           C  
ANISOU 2194  C   GLY A 138     4542   4280   4328    -36     33     15
ATOM   2195  O   GLY A 138      13.629  52.185  65.650  1.00 34.23           O  
ANISOU 2195  O   GLY A 138     4531   4175   4298    -45     67    -45
ATOM   2196  H   GLY A 138      16.878  51.034  63.109  1.00  0.00           H  
ATOM   2197  HA3 GLY A 138      15.091  52.468  63.073  1.00  0.00           H  
ATOM   2198  HA2 GLY A 138      15.656  53.196  64.558  1.00  0.00           H  
ATOM   2199  N   ILE A 139      14.123  50.213  64.657  1.00 35.40           N  
ANISOU 2199  N   ILE A 139     4626   4458   4366     -5      4     38
ATOM   2200  CA  ILE A 139      13.158  49.396  65.404  1.00 34.73           C  
ANISOU 2200  CA  ILE A 139     4563   4400   4235     14      5      5
ATOM   2201  C   ILE A 139      13.585  49.152  66.868  1.00 34.41           C  
ANISOU 2201  C   ILE A 139     4574   4361   4137    -39    -11    -65
ATOM   2202  O   ILE A 139      12.708  49.095  67.729  1.00 34.01           O  
ANISOU 2202  O   ILE A 139     4568   4295   4060    -45     32   -111
ATOM   2203  CB  ILE A 139      12.850  48.039  64.691  1.00 37.09           C  
ANISOU 2203  CB  ILE A 139     4835   4770   4489     46    -29     42
ATOM   2204  CG1 ILE A 139      12.119  48.244  63.342  1.00 44.20           C  
ANISOU 2204  CG1 ILE A 139     5706   5673   5416     91    -23    103
ATOM   2205  CG2 ILE A 139      12.074  47.010  65.543  1.00 34.04           C  
ANISOU 2205  CG2 ILE A 139     4470   4404   4058     46    -28     12
ATOM   2206  CD1 ILE A 139      10.803  49.036  63.405  1.00 47.23           C  
ANISOU 2206  CD1 ILE A 139     6076   6014   5857    126      4    105
ATOM   2207  H   ILE A 139      14.694  49.725  63.979  1.00  0.00           H  
ATOM   2208  HA  ILE A 139      12.229  49.964  65.465  1.00  0.00           H  
ATOM   2209  HB  ILE A 139      13.808  47.575  64.449  1.00  0.00           H  
ATOM   2210 HG13 ILE A 139      11.935  47.281  62.868  1.00  0.00           H  
ATOM   2211 HG12 ILE A 139      12.784  48.766  62.663  1.00  0.00           H  
ATOM   2212 HG21 ILE A 139      11.787  46.137  64.960  1.00  0.00           H  
ATOM   2213 HG22 ILE A 139      12.670  46.638  66.377  1.00  0.00           H  
ATOM   2214 HG23 ILE A 139      11.161  47.445  65.946  1.00  0.00           H  
ATOM   2215 HD11 ILE A 139      10.230  48.909  62.487  1.00  0.00           H  
ATOM   2216 HD12 ILE A 139      10.172  48.722  64.236  1.00  0.00           H  
ATOM   2217 HD13 ILE A 139      10.996  50.103  63.509  1.00  0.00           H  
ATOM   2218  N   HIS A 140      14.902  49.077  67.140  1.00 33.68           N  
ANISOU 2218  N   HIS A 140     4476   4292   4028    -81    -71    -71
ATOM   2219  CA  HIS A 140      15.460  49.025  68.496  1.00 33.49           C  
ANISOU 2219  CA  HIS A 140     4511   4275   3941   -141   -119   -126
ATOM   2220  C   HIS A 140      15.149  50.292  69.307  1.00 33.76           C  
ANISOU 2220  C   HIS A 140     4607   4241   3978   -185    -71   -202
ATOM   2221  O   HIS A 140      14.795  50.166  70.478  1.00 33.92           O  
ANISOU 2221  O   HIS A 140     4711   4264   3912   -224    -64   -262
ATOM   2222  CB  HIS A 140      16.977  48.726  68.460  1.00 35.13           C  
ANISOU 2222  CB  HIS A 140     4674   4510   4166   -176   -212   -113
ATOM   2223  CG  HIS A 140      17.672  48.810  69.797  1.00 38.76           C  
ANISOU 2223  CG  HIS A 140     5194   4972   4561   -248   -292   -164
ATOM   2224  ND1 HIS A 140      17.366  47.976  70.860  1.00 45.82           N  
ANISOU 2224  ND1 HIS A 140     6099   5825   5487   -316   -317   -219
ATOM   2225  CD2 HIS A 140      18.626  49.682  70.272  1.00 46.19           C  
ANISOU 2225  CD2 HIS A 140     6205   5951   5395   -273   -356   -169
ATOM   2226  CE1 HIS A 140      18.098  48.383  71.900  1.00 47.26           C  
ANISOU 2226  CE1 HIS A 140     6354   6027   5574   -380   -406   -261
ATOM   2227  NE2 HIS A 140      18.890  49.410  71.616  1.00 45.40           N  
ANISOU 2227  NE2 HIS A 140     6162   5842   5247   -354   -430   -224
ATOM   2228  H   HIS A 140      15.574  49.108  66.385  1.00  0.00           H  
ATOM   2229  HA  HIS A 140      14.966  48.208  69.019  1.00  0.00           H  
ATOM   2230  HB3 HIS A 140      17.479  49.417  67.783  1.00  0.00           H  
ATOM   2231  HB2 HIS A 140      17.156  47.728  68.062  1.00  0.00           H  
ATOM   2232  HD1 HIS A 140      16.727  47.191  70.859  1.00  0.00           H  
ATOM   2233  HD2 HIS A 140      19.119  50.496  69.760  1.00  0.00           H  
ATOM   2234  HE1 HIS A 140      18.063  47.909  72.870  1.00  0.00           H  
ATOM   2235  N   TYR A 141      15.245  51.471  68.668  1.00 34.71           N  
ANISOU 2235  N   TYR A 141     4698   4295   4196   -184    -32   -202
ATOM   2236  CA  TYR A 141      14.876  52.750  69.272  1.00 34.48           C  
ANISOU 2236  CA  TYR A 141     4724   4176   4202   -218     27   -282
ATOM   2237  C   TYR A 141      13.382  52.830  69.634  1.00 32.92           C  
ANISOU 2237  C   TYR A 141     4560   3947   4001   -174    126   -316
ATOM   2238  O   TYR A 141      13.066  53.293  70.729  1.00 33.63           O  
ANISOU 2238  O   TYR A 141     4729   4002   4046   -214    177   -414
ATOM   2239  CB  TYR A 141      15.321  53.914  68.367  1.00 35.12           C  
ANISOU 2239  CB  TYR A 141     4759   4175   4410   -220     51   -253
ATOM   2240  CG  TYR A 141      14.922  55.284  68.889  1.00 33.69           C  
ANISOU 2240  CG  TYR A 141     4628   3874   4300   -239    127   -332
ATOM   2241  CD1 TYR A 141      15.653  55.876  69.939  1.00 31.11           C  
ANISOU 2241  CD1 TYR A 141     4363   3502   3957   -329    106   -437
ATOM   2242  CD2 TYR A 141      13.791  55.944  68.363  1.00 30.73           C  
ANISOU 2242  CD2 TYR A 141     4235   3422   4018   -166    212   -307
ATOM   2243  CE1 TYR A 141      15.247  57.115  70.472  1.00 34.26           C  
ANISOU 2243  CE1 TYR A 141     4816   3774   4429   -348    189   -530
ATOM   2244  CE2 TYR A 141      13.395  57.189  68.887  1.00 31.63           C  
ANISOU 2244  CE2 TYR A 141     4387   3405   4226   -172    293   -387
ATOM   2245  CZ  TYR A 141      14.112  57.766  69.953  1.00 34.02           C  
ANISOU 2245  CZ  TYR A 141     4762   3657   4508   -264    290   -505
ATOM   2246  OH  TYR A 141      13.703  58.955  70.482  1.00 36.95           O  
ANISOU 2246  OH  TYR A 141     5177   3884   4979   -272    382   -602
ATOM   2247  H   TYR A 141      15.564  51.499  67.709  1.00  0.00           H  
ATOM   2248  HA  TYR A 141      15.438  52.831  70.204  1.00  0.00           H  
ATOM   2249  HB3 TYR A 141      14.910  53.791  67.364  1.00  0.00           H  
ATOM   2250  HB2 TYR A 141      16.405  53.886  68.248  1.00  0.00           H  
ATOM   2251  HD1 TYR A 141      16.515  55.372  70.350  1.00  0.00           H  
ATOM   2252  HD2 TYR A 141      13.222  55.495  67.564  1.00  0.00           H  
ATOM   2253  HE1 TYR A 141      15.805  57.557  71.284  1.00  0.00           H  
ATOM   2254  HE2 TYR A 141      12.538  57.697  68.474  1.00  0.00           H  
ATOM   2255  HH  TYR A 141      14.270  59.269  71.191  1.00  0.00           H  
ATOM   2256  N   LEU A 142      12.501  52.351  68.736  1.00 30.85           N  
ANISOU 2256  N   LEU A 142     4237   3698   3789    -97    154   -243
ATOM   2257  CA  LEU A 142      11.059  52.267  68.977  1.00 32.22           C  
ANISOU 2257  CA  LEU A 142     4409   3847   3986    -52    242   -269
ATOM   2258  C   LEU A 142      10.737  51.329  70.155  1.00 30.98           C  
ANISOU 2258  C   LEU A 142     4318   3751   3703    -90    260   -320
ATOM   2259  O   LEU A 142      10.057  51.763  71.083  1.00 32.83           O  
ANISOU 2259  O   LEU A 142     4609   3948   3918   -110    355   -405
ATOM   2260  CB  LEU A 142      10.316  51.835  67.688  1.00 31.10           C  
ANISOU 2260  CB  LEU A 142     4180   3725   3911     26    232   -174
ATOM   2261  CG  LEU A 142      10.358  52.857  66.526  1.00 33.71           C  
ANISOU 2261  CG  LEU A 142     4458   3993   4355     69    219   -101
ATOM   2262  CD1 LEU A 142       9.852  52.228  65.209  1.00 36.05           C  
ANISOU 2262  CD1 LEU A 142     4687   4331   4680    134    184    -10
ATOM   2263  CD2 LEU A 142       9.634  54.177  66.862  1.00 32.57           C  
ANISOU 2263  CD2 LEU A 142     4322   3720   4333     83    299   -151
ATOM   2264  H   LEU A 142      12.833  51.988  67.853  1.00  0.00           H  
ATOM   2265  HA  LEU A 142      10.718  53.264  69.262  1.00  0.00           H  
ATOM   2266  HB3 LEU A 142       9.270  51.629  67.919  1.00  0.00           H  
ATOM   2267  HB2 LEU A 142      10.734  50.887  67.349  1.00  0.00           H  
ATOM   2268  HG  LEU A 142      11.402  53.115  66.360  1.00  0.00           H  
ATOM   2269 HD11 LEU A 142      10.618  52.297  64.436  1.00  0.00           H  
ATOM   2270 HD12 LEU A 142       9.606  51.172  65.327  1.00  0.00           H  
ATOM   2271 HD13 LEU A 142       8.959  52.713  64.817  1.00  0.00           H  
ATOM   2272 HD21 LEU A 142       8.859  54.436  66.141  1.00  0.00           H  
ATOM   2273 HD22 LEU A 142       9.154  54.145  67.839  1.00  0.00           H  
ATOM   2274 HD23 LEU A 142      10.341  55.007  66.875  1.00  0.00           H  
ATOM   2275  N   HIS A 143      11.275  50.096  70.122  1.00 31.85           N  
ANISOU 2275  N   HIS A 143     4425   3948   3729   -100    176   -266
ATOM   2276  CA  HIS A 143      11.096  49.064  71.151  1.00 30.22           C  
ANISOU 2276  CA  HIS A 143     4287   3798   3398   -138    176   -283
ATOM   2277  C   HIS A 143      11.624  49.454  72.544  1.00 32.54           C  
ANISOU 2277  C   HIS A 143     4700   4087   3576   -223    174   -366
ATOM   2278  O   HIS A 143      10.992  49.092  73.536  1.00 34.02           O  
ANISOU 2278  O   HIS A 143     4968   4282   3675   -256    252   -415
ATOM   2279  CB  HIS A 143      11.736  47.737  70.685  1.00 32.17           C  
ANISOU 2279  CB  HIS A 143     4502   4117   3606   -127     73   -202
ATOM   2280  CG  HIS A 143      11.030  47.010  69.562  1.00 27.27           C  
ANISOU 2280  CG  HIS A 143     3796   3510   3054    -61     87   -141
ATOM   2281  ND1 HIS A 143      11.516  45.805  69.045  1.00 31.00           N  
ANISOU 2281  ND1 HIS A 143     4242   4031   3505    -47     21    -85
ATOM   2282  CD2 HIS A 143       9.862  47.333  68.900  1.00 30.73           C  
ANISOU 2282  CD2 HIS A 143     4170   3916   3590    -10    147   -132
ATOM   2283  CE1 HIS A 143      10.640  45.453  68.113  1.00 32.59           C  
ANISOU 2283  CE1 HIS A 143     4377   4235   3771      1     41    -54
ATOM   2284  NE2 HIS A 143       9.635  46.320  67.988  1.00 30.86           N  
ANISOU 2284  NE2 HIS A 143     4130   3972   3624     25    107    -74
ATOM   2285  H   HIS A 143      11.839  49.829  69.326  1.00  0.00           H  
ATOM   2286  HA  HIS A 143      10.022  48.904  71.271  1.00  0.00           H  
ATOM   2287  HB3 HIS A 143      11.797  47.040  71.521  1.00  0.00           H  
ATOM   2288  HB2 HIS A 143      12.766  47.916  70.373  1.00  0.00           H  
ATOM   2289  HD2 HIS A 143       9.190  48.169  69.002  1.00  0.00           H  
ATOM   2290  HE1 HIS A 143      10.739  44.562  67.512  1.00  0.00           H  
ATOM   2291  HE2 HIS A 143       8.856  46.260  67.340  1.00  0.00           H  
ATOM   2292  N   ALA A 144      12.735  50.210  72.602  1.00 33.70           N  
ANISOU 2292  N   ALA A 144     4861   4220   3723   -265     94   -388
ATOM   2293  CA  ALA A 144      13.314  50.750  73.838  1.00 35.23           C  
ANISOU 2293  CA  ALA A 144     5175   4406   3804   -359     72   -481
ATOM   2294  C   ALA A 144      12.418  51.787  74.543  1.00 37.84           C  
ANISOU 2294  C   ALA A 144     5577   4658   4142   -378    221   -601
ATOM   2295  O   ALA A 144      12.477  51.889  75.767  1.00 37.37           O  
ANISOU 2295  O   ALA A 144     5649   4604   3946   -458    244   -693
ATOM   2296  CB  ALA A 144      14.695  51.348  73.526  1.00 34.68           C  
ANISOU 2296  CB  ALA A 144     5078   4328   3769   -403    -53   -481
ATOM   2297  H   ALA A 144      13.219  50.448  71.746  1.00  0.00           H  
ATOM   2298  HA  ALA A 144      13.457  49.917  74.529  1.00  0.00           H  
ATOM   2299  HB1 ALA A 144      15.155  51.771  74.420  1.00  0.00           H  
ATOM   2300  HB2 ALA A 144      15.374  50.586  73.143  1.00  0.00           H  
ATOM   2301  HB3 ALA A 144      14.630  52.141  72.780  1.00  0.00           H  
ATOM   2302  N   ASN A 145      11.591  52.502  73.761  1.00 37.09           N  
ANISOU 2302  N   ASN A 145     5398   4486   4208   -305    320   -601
ATOM   2303  CA  ASN A 145      10.583  53.464  74.221  1.00 37.21           C  
ANISOU 2303  CA  ASN A 145     5447   4409   4280   -296    481   -708
ATOM   2304  C   ASN A 145       9.175  52.835  74.320  1.00 37.27           C  
ANISOU 2304  C   ASN A 145     5426   4429   4305   -245    611   -703
ATOM   2305  O   ASN A 145       8.221  53.573  74.566  1.00 39.39           O  
ANISOU 2305  O   ASN A 145     5677   4612   4680   -211    758   -778
ATOM   2306  CB  ASN A 145      10.603  54.677  73.257  1.00 36.64           C  
ANISOU 2306  CB  ASN A 145     5292   4223   4406   -244    506   -704
ATOM   2307  CG  ASN A 145      11.842  55.562  73.438  1.00 35.23           C  
ANISOU 2307  CG  ASN A 145     5163   3997   4225   -319    434   -758
ATOM   2308  OD1 ASN A 145      11.983  56.229  74.461  1.00 37.57           O  
ANISOU 2308  OD1 ASN A 145     5567   4246   4463   -391    482   -892
ATOM   2309  ND2 ASN A 145      12.737  55.589  72.451  1.00 34.90           N  
ANISOU 2309  ND2 ASN A 145     5044   3969   4247   -311    325   -663
ATOM   2310  H   ASN A 145      11.615  52.345  72.762  1.00  0.00           H  
ATOM   2311  HA  ASN A 145      10.874  53.803  75.218  1.00  0.00           H  
ATOM   2312  HB3 ASN A 145       9.748  55.327  73.449  1.00  0.00           H  
ATOM   2313  HB2 ASN A 145      10.505  54.353  72.219  1.00  0.00           H  
ATOM   2314 HD22 ASN A 145      13.558  56.170  72.530  1.00  0.00           H  
ATOM   2315 HD21 ASN A 145      12.626  54.997  71.637  1.00  0.00           H  
ATOM   2316  N   TRP A 146       9.056  51.504  74.142  1.00 37.13           N  
ANISOU 2316  N   TRP A 146     5397   4507   4203   -242    562   -620
ATOM   2317  CA  TRP A 146       7.813  50.714  74.170  1.00 39.57           C  
ANISOU 2317  CA  TRP A 146     5667   4834   4532   -208    675   -604
ATOM   2318  C   TRP A 146       6.791  51.064  73.063  1.00 38.49           C  
ANISOU 2318  C   TRP A 146     5375   4634   4614   -106    731   -568
ATOM   2319  O   TRP A 146       5.605  50.768  73.213  1.00 40.16           O  
ANISOU 2319  O   TRP A 146     5543   4806   4910    -77    873   -612
ATOM   2320  CB  TRP A 146       7.187  50.670  75.588  1.00 41.47           C  
ANISOU 2320  CB  TRP A 146     6032   5065   4659   -275    833   -723
ATOM   2321  CG  TRP A 146       7.985  49.950  76.635  1.00 55.27           C  
ANISOU 2321  CG  TRP A 146     7933   6898   6167   -375    772   -719
ATOM   2322  CD1 TRP A 146       7.930  48.618  76.862  1.00 61.68           C  
ANISOU 2322  CD1 TRP A 146     8770   7787   6879   -397    748   -635
ATOM   2323  CD2 TRP A 146       8.991  50.470  77.560  1.00 64.20           C  
ANISOU 2323  CD2 TRP A 146     9222   8043   7129   -471    714   -796
ATOM   2324  NE1 TRP A 146       8.798  48.282  77.878  1.00 67.91           N  
ANISOU 2324  NE1 TRP A 146     9725   8635   7444   -494    674   -639
ATOM   2325  CE2 TRP A 146       9.482  49.383  78.348  1.00 68.52           C  
ANISOU 2325  CE2 TRP A 146     9886   8682   7468   -544    643   -740
ATOM   2326  CE3 TRP A 146       9.536  51.749  77.825  1.00 68.13           C  
ANISOU 2326  CE3 TRP A 146     9775   8478   7634   -509    703   -905
ATOM   2327  CZ2 TRP A 146      10.455  49.556  79.348  1.00 74.28           C  
ANISOU 2327  CZ2 TRP A 146    10786   9453   7987   -651    546   -782
ATOM   2328  CZ3 TRP A 146      10.518  51.934  78.821  1.00 75.50           C  
ANISOU 2328  CZ3 TRP A 146    10874   9452   8360   -623    612   -964
ATOM   2329  CH2 TRP A 146      10.975  50.841  79.584  1.00 75.62           C  
ANISOU 2329  CH2 TRP A 146    11004   9570   8160   -691    527   -899
ATOM   2330  H   TRP A 146       9.895  50.971  73.957  1.00  0.00           H  
ATOM   2331  HA  TRP A 146       8.113  49.694  73.926  1.00  0.00           H  
ATOM   2332  HB3 TRP A 146       6.217  50.172  75.560  1.00  0.00           H  
ATOM   2333  HB2 TRP A 146       6.983  51.678  75.946  1.00  0.00           H  
ATOM   2334  HD1 TRP A 146       7.283  47.936  76.329  1.00  0.00           H  
ATOM   2335  HE1 TRP A 146       8.896  47.338  78.225  1.00  0.00           H  
ATOM   2336  HE3 TRP A 146       9.194  52.600  77.257  1.00  0.00           H  
ATOM   2337  HZ2 TRP A 146      10.803  48.713  79.926  1.00  0.00           H  
ATOM   2338  HZ3 TRP A 146      10.919  52.920  79.001  1.00  0.00           H  
ATOM   2339  HH2 TRP A 146      11.727  50.991  80.345  1.00  0.00           H  
ATOM   2340  N   VAL A 147       7.274  51.635  71.949  1.00 38.31           N  
ANISOU 2340  N   VAL A 147     5270   4600   4684    -55    617   -485
ATOM   2341  CA  VAL A 147       6.511  51.847  70.722  1.00 37.18           C  
ANISOU 2341  CA  VAL A 147     4991   4411   4725     37    618   -418
ATOM   2342  C   VAL A 147       6.724  50.630  69.803  1.00 37.79           C  
ANISOU 2342  C   VAL A 147     5010   4575   4772     59    494   -303
ATOM   2343  O   VAL A 147       7.857  50.181  69.641  1.00 36.03           O  
ANISOU 2343  O   VAL A 147     4822   4402   4464     31    388   -263
ATOM   2344  CB  VAL A 147       6.987  53.133  69.980  1.00 39.36           C  
ANISOU 2344  CB  VAL A 147     5244   4590   5120     68    595   -413
ATOM   2345  CG1 VAL A 147       6.348  53.342  68.589  1.00 40.64           C  
ANISOU 2345  CG1 VAL A 147     5275   4707   5459    164    569   -317
ATOM   2346  CG2 VAL A 147       6.760  54.389  70.842  1.00 36.66           C  
ANISOU 2346  CG2 VAL A 147     4972   4145   4814     40    720   -548
ATOM   2347  H   VAL A 147       8.265  51.830  71.885  1.00  0.00           H  
ATOM   2348  HA  VAL A 147       5.448  51.949  70.950  1.00  0.00           H  
ATOM   2349  HB  VAL A 147       8.063  53.059  69.819  1.00  0.00           H  
ATOM   2350 HG11 VAL A 147       6.644  54.300  68.163  1.00  0.00           H  
ATOM   2351 HG12 VAL A 147       6.655  52.580  67.873  1.00  0.00           H  
ATOM   2352 HG13 VAL A 147       5.259  53.331  68.647  1.00  0.00           H  
ATOM   2353 HG21 VAL A 147       7.075  55.292  70.319  1.00  0.00           H  
ATOM   2354 HG22 VAL A 147       5.707  54.507  71.098  1.00  0.00           H  
ATOM   2355 HG23 VAL A 147       7.326  54.344  71.773  1.00  0.00           H  
ATOM   2356  N   LEU A 148       5.632  50.133  69.208  1.00 37.77           N  
ANISOU 2356  N   LEU A 148     4915   4588   4847    105    512   -262
ATOM   2357  CA  LEU A 148       5.655  49.060  68.214  1.00 36.82           C  
ANISOU 2357  CA  LEU A 148     4739   4538   4713    125    402   -169
ATOM   2358  C   LEU A 148       5.287  49.660  66.851  1.00 36.24           C  
ANISOU 2358  C   LEU A 148     4576   4428   4767    195    339    -98
ATOM   2359  O   LEU A 148       4.467  50.581  66.798  1.00 36.14           O  
ANISOU 2359  O   LEU A 148     4514   4329   4889    240    395   -111
ATOM   2360  CB  LEU A 148       4.637  47.969  68.614  1.00 36.26           C  
ANISOU 2360  CB  LEU A 148     4627   4503   4645    115    449   -171
ATOM   2361  CG  LEU A 148       4.876  47.315  69.992  1.00 40.24           C  
ANISOU 2361  CG  LEU A 148     5235   5033   5020     40    532   -230
ATOM   2362  CD1 LEU A 148       3.734  46.333  70.333  1.00 36.49           C  
ANISOU 2362  CD1 LEU A 148     4708   4579   4576     26    598   -221
ATOM   2363  CD2 LEU A 148       6.268  46.660  70.094  1.00 37.15           C  
ANISOU 2363  CD2 LEU A 148     4949   4700   4467    -11    431   -206
ATOM   2364  H   LEU A 148       4.732  50.559  69.376  1.00  0.00           H  
ATOM   2365  HA  LEU A 148       6.648  48.614  68.131  1.00  0.00           H  
ATOM   2366  HB3 LEU A 148       4.633  47.189  67.850  1.00  0.00           H  
ATOM   2367  HB2 LEU A 148       3.636  48.405  68.613  1.00  0.00           H  
ATOM   2368  HG  LEU A 148       4.839  48.098  70.751  1.00  0.00           H  
ATOM   2369 HD11 LEU A 148       4.095  45.350  70.631  1.00  0.00           H  
ATOM   2370 HD12 LEU A 148       3.129  46.714  71.157  1.00  0.00           H  
ATOM   2371 HD13 LEU A 148       3.062  46.178  69.488  1.00  0.00           H  
ATOM   2372 HD21 LEU A 148       6.249  45.727  70.653  1.00  0.00           H  
ATOM   2373 HD22 LEU A 148       6.687  46.437  69.112  1.00  0.00           H  
ATOM   2374 HD23 LEU A 148       6.968  47.322  70.606  1.00  0.00           H  
ATOM   2375  N   HIS A 149       5.868  49.110  65.771  1.00 34.71           N  
ANISOU 2375  N   HIS A 149     4369   4291   4527    203    225    -21
ATOM   2376  CA  HIS A 149       5.552  49.527  64.404  1.00 34.96           C  
ANISOU 2376  CA  HIS A 149     4335   4304   4644    259    151     63
ATOM   2377  C   HIS A 149       4.178  49.005  63.959  1.00 35.26           C  
ANISOU 2377  C   HIS A 149     4270   4353   4774    296    129     90
ATOM   2378  O   HIS A 149       3.344  49.809  63.550  1.00 38.27           O  
ANISOU 2378  O   HIS A 149     4570   4671   5301    351    130    120
ATOM   2379  CB  HIS A 149       6.670  49.111  63.433  1.00 33.54           C  
ANISOU 2379  CB  HIS A 149     4194   4188   4363    244     55    124
ATOM   2380  CG  HIS A 149       6.619  49.857  62.121  1.00 33.56           C  
ANISOU 2380  CG  HIS A 149     4169   4169   4415    284    -12    217
ATOM   2381  ND1 HIS A 149       5.654  49.609  61.139  1.00 32.81           N  
ANISOU 2381  ND1 HIS A 149     4009   4092   4367    322    -87    276
ATOM   2382  CD2 HIS A 149       7.441  50.869  61.681  1.00 36.63           C  
ANISOU 2382  CD2 HIS A 149     4591   4515   4810    286    -23    268
ATOM   2383  CE1 HIS A 149       5.916  50.477  60.173  1.00 37.23           C  
ANISOU 2383  CE1 HIS A 149     4575   4628   4941    347   -149    368
ATOM   2384  NE2 HIS A 149       6.962  51.256  60.442  1.00 37.36           N  
ANISOU 2384  NE2 HIS A 149     4653   4604   4937    326   -101    368
ATOM   2385  H   HIS A 149       6.502  48.327  65.877  1.00  0.00           H  
ATOM   2386  HA  HIS A 149       5.513  50.618  64.404  1.00  0.00           H  
ATOM   2387  HB3 HIS A 149       6.642  48.037  63.241  1.00  0.00           H  
ATOM   2388  HB2 HIS A 149       7.642  49.310  63.885  1.00  0.00           H  
ATOM   2389  HD2 HIS A 149       8.280  51.346  62.162  1.00  0.00           H  
ATOM   2390  HE1 HIS A 149       5.333  50.555  59.270  1.00  0.00           H  
ATOM   2391  HE2 HIS A 149       7.317  52.001  59.856  1.00  0.00           H  
ATOM   2392  N   ARG A 150       3.962  47.683  64.081  1.00 35.85           N  
ANISOU 2392  N   ARG A 150     4343   4500   4778    264    102     81
ATOM   2393  CA  ARG A 150       2.687  46.993  63.841  1.00 35.28           C  
ANISOU 2393  CA  ARG A 150     4172   4444   4790    275     84     91
ATOM   2394  C   ARG A 150       2.214  46.982  62.364  1.00 37.53           C  
ANISOU 2394  C   ARG A 150     4392   4756   5112    308    -56    169
ATOM   2395  O   ARG A 150       1.057  46.633  62.124  1.00 39.55           O  
ANISOU 2395  O   ARG A 150     4554   5025   5450    311    -94    177
ATOM   2396  CB  ARG A 150       1.583  47.496  64.822  1.00 37.19           C  
ANISOU 2396  CB  ARG A 150     4332   4616   5181    297    205     42
ATOM   2397  CG  ARG A 150       2.034  47.509  66.298  1.00 36.88           C  
ANISOU 2397  CG  ARG A 150     4383   4561   5069    249    348    -45
ATOM   2398  CD  ARG A 150       0.952  47.880  67.326  1.00 37.80           C  
ANISOU 2398  CD  ARG A 150     4428   4622   5311    255    501   -110
ATOM   2399  NE  ARG A 150       0.609  49.307  67.307  1.00 36.91           N  
ANISOU 2399  NE  ARG A 150     4261   4412   5354    318    562   -131
ATOM   2400  CZ  ARG A 150      -0.096  49.953  68.253  1.00 47.00           C  
ANISOU 2400  CZ  ARG A 150     5507   5618   6732    326    734   -219
ATOM   2401  NH1 ARG A 150      -0.521  49.348  69.368  1.00 49.25           N  
ANISOU 2401  NH1 ARG A 150     5822   5930   6959    265    872   -289
ATOM   2402  NH2 ARG A 150      -0.384  51.244  68.083  1.00 42.16           N1+
ANISOU 2402  NH2 ARG A 150     4838   4897   6282    394    779   -237
ATOM   2403  H   ARG A 150       4.717  47.092  64.412  1.00  0.00           H  
ATOM   2404  HA  ARG A 150       2.880  45.947  64.084  1.00  0.00           H  
ATOM   2405  HB3 ARG A 150       0.711  46.848  64.735  1.00  0.00           H  
ATOM   2406  HB2 ARG A 150       1.240  48.491  64.537  1.00  0.00           H  
ATOM   2407  HG3 ARG A 150       2.814  48.262  66.379  1.00  0.00           H  
ATOM   2408  HG2 ARG A 150       2.502  46.567  66.581  1.00  0.00           H  
ATOM   2409  HD3 ARG A 150       1.231  47.526  68.317  1.00  0.00           H  
ATOM   2410  HD2 ARG A 150       0.020  47.387  67.066  1.00  0.00           H  
ATOM   2411  HE  ARG A 150       0.869  49.820  66.473  1.00  0.00           H  
ATOM   2412 HH12 ARG A 150      -1.042  49.860  70.064  1.00  0.00           H  
ATOM   2413 HH11 ARG A 150      -0.296  48.375  69.546  1.00  0.00           H  
ATOM   2414 HH22 ARG A 150      -0.892  51.767  68.780  1.00  0.00           H  
ATOM   2415 HH21 ARG A 150      -0.097  51.700  67.224  1.00  0.00           H  
ATOM   2416  N   ASP A 151       3.097  47.381  61.428  1.00 38.74           N  
ANISOU 2416  N   ASP A 151     4601   4921   5198    321   -132    228
ATOM   2417  CA  ASP A 151       2.836  47.600  59.995  1.00 38.02           C  
ANISOU 2417  CA  ASP A 151     4483   4861   5103    343   -270    311
ATOM   2418  C   ASP A 151       4.114  47.486  59.128  1.00 36.81           C  
ANISOU 2418  C   ASP A 151     4439   4754   4793    321   -316    350
ATOM   2419  O   ASP A 151       4.192  48.133  58.085  1.00 36.69           O  
ANISOU 2419  O   ASP A 151     4440   4736   4765    342   -394    436
ATOM   2420  CB  ASP A 151       2.063  48.926  59.710  1.00 40.13           C  
ANISOU 2420  CB  ASP A 151     4659   5050   5540    410   -304    377
ATOM   2421  CG  ASP A 151       0.558  48.835  59.934  1.00 47.70           C  
ANISOU 2421  CG  ASP A 151     5564   6043   6516    430   -474    470
ATOM   2422  OD1 ASP A 151      -0.085  48.154  59.106  1.00 50.51           O  
ANISOU 2422  OD1 ASP A 151     5930   6481   6782    389   -554    456
ATOM   2423  OD2 ASP A 151       0.047  49.473  60.880  1.00 57.82           O1-
ANISOU 2423  OD2 ASP A 151     6798   7263   7906    486   -537    558
ATOM   2424  H   ASP A 151       3.977  47.768  61.742  1.00  0.00           H  
ATOM   2425  HA  ASP A 151       2.212  46.769  59.662  1.00  0.00           H  
ATOM   2426  HB3 ASP A 151       2.200  49.314  58.701  1.00  0.00           H  
ATOM   2427  HB2 ASP A 151       2.459  49.717  60.349  1.00  0.00           H  
ATOM   2428  N   LEU A 152       5.122  46.698  59.538  1.00 37.20           N  
ANISOU 2428  N   LEU A 152     4560   4844   4730    277   -267    293
ATOM   2429  CA  LEU A 152       6.403  46.636  58.815  1.00 39.29           C  
ANISOU 2429  CA  LEU A 152     4910   5147   4869    255   -278    314
ATOM   2430  C   LEU A 152       6.295  45.890  57.474  1.00 39.67           C  
ANISOU 2430  C   LEU A 152     4988   5268   4818    240   -369    340
ATOM   2431  O   LEU A 152       5.724  44.801  57.417  1.00 40.47           O  
ANISOU 2431  O   LEU A 152     5073   5407   4897    221   -403    294
ATOM   2432  CB  LEU A 152       7.502  46.005  59.701  1.00 40.10           C  
ANISOU 2432  CB  LEU A 152     5060   5264   4912    220   -207    246
ATOM   2433  CG  LEU A 152       8.303  47.030  60.526  1.00 49.42           C  
ANISOU 2433  CG  LEU A 152     6268   6395   6114    211   -138    235
ATOM   2434  CD1 LEU A 152       9.212  46.333  61.552  1.00 49.14           C  
ANISOU 2434  CD1 LEU A 152     6266   6386   6018    176   -109    177
ATOM   2435  CD2 LEU A 152       9.089  48.025  59.644  1.00 43.34           C  
ANISOU 2435  CD2 LEU A 152     5529   5609   5330    214   -146    304
ATOM   2436  H   LEU A 152       5.049  46.145  60.379  1.00  0.00           H  
ATOM   2437  HA  LEU A 152       6.683  47.666  58.589  1.00  0.00           H  
ATOM   2438  HB3 LEU A 152       8.217  45.447  59.093  1.00  0.00           H  
ATOM   2439  HB2 LEU A 152       7.042  45.270  60.363  1.00  0.00           H  
ATOM   2440  HG  LEU A 152       7.574  47.596  61.098  1.00  0.00           H  
ATOM   2441 HD11 LEU A 152      10.268  46.398  61.294  1.00  0.00           H  
ATOM   2442 HD12 LEU A 152       9.085  46.781  62.536  1.00  0.00           H  
ATOM   2443 HD13 LEU A 152       8.974  45.275  61.645  1.00  0.00           H  
ATOM   2444 HD21 LEU A 152      10.113  48.172  59.986  1.00  0.00           H  
ATOM   2445 HD22 LEU A 152       9.140  47.695  58.606  1.00  0.00           H  
ATOM   2446 HD23 LEU A 152       8.614  49.006  59.649  1.00  0.00           H  
ATOM   2447  N   LYS A 153       6.884  46.477  56.426  1.00 39.67           N  
ANISOU 2447  N   LYS A 153     5042   5282   4750    240   -403    413
ATOM   2448  CA  LYS A 153       6.950  45.978  55.049  1.00 40.69           C  
ANISOU 2448  CA  LYS A 153     5231   5485   4744    215   -479    436
ATOM   2449  C   LYS A 153       7.841  46.957  54.242  1.00 40.47           C  
ANISOU 2449  C   LYS A 153     5287   5464   4626    201   -454    511
ATOM   2450  O   LYS A 153       8.034  48.086  54.706  1.00 42.78           O  
ANISOU 2450  O   LYS A 153     5570   5690   4994    218   -405    559
ATOM   2451  CB  LYS A 153       5.526  45.797  54.451  1.00 40.79           C  
ANISOU 2451  CB  LYS A 153     5195   5511   4791    229   -613    481
ATOM   2452  CG  LYS A 153       4.639  47.054  54.502  1.00 42.16           C  
ANISOU 2452  CG  LYS A 153     5312   5617   5088    279   -663    584
ATOM   2453  CD  LYS A 153       3.169  46.776  54.150  1.00 48.56           C  
ANISOU 2453  CD  LYS A 153     6033   6435   5982    298   -802    615
ATOM   2454  CE  LYS A 153       2.246  47.980  54.413  1.00 52.67           C  
ANISOU 2454  CE  LYS A 153     6472   6870   6670    363   -850    716
ATOM   2455  NZ  LYS A 153       2.129  48.287  55.850  1.00 59.37           N1+
ANISOU 2455  NZ  LYS A 153     7232   7732   7593    382  -1025    776
ATOM   2456  H   LYS A 153       7.306  47.390  56.534  1.00  0.00           H  
ATOM   2457  HA  LYS A 153       7.440  45.006  55.104  1.00  0.00           H  
ATOM   2458  HB3 LYS A 153       5.024  44.996  54.992  1.00  0.00           H  
ATOM   2459  HB2 LYS A 153       5.582  45.437  53.425  1.00  0.00           H  
ATOM   2460  HG3 LYS A 153       5.036  47.814  53.828  1.00  0.00           H  
ATOM   2461  HG2 LYS A 153       4.683  47.487  55.500  1.00  0.00           H  
ATOM   2462  HD3 LYS A 153       2.808  45.913  54.713  1.00  0.00           H  
ATOM   2463  HD2 LYS A 153       3.098  46.499  53.098  1.00  0.00           H  
ATOM   2464  HE3 LYS A 153       1.247  47.769  54.031  1.00  0.00           H  
ATOM   2465  HE2 LYS A 153       2.608  48.863  53.885  1.00  0.00           H  
ATOM   2466  HZ1 LYS A 153       1.755  47.492  56.345  1.00  0.00           H  
ATOM   2467  HZ2 LYS A 153       3.041  48.513  56.224  1.00  0.00           H  
ATOM   2468  HZ3 LYS A 153       1.513  49.076  55.979  1.00  0.00           H  
ATOM   2469  N   PRO A 154       8.362  46.549  53.055  1.00 41.14           N  
ANISOU 2469  N   PRO A 154     5459   5624   4550    164   -474    517
ATOM   2470  CA  PRO A 154       9.307  47.367  52.257  1.00 39.45           C  
ANISOU 2470  CA  PRO A 154     5332   5420   4239    138   -422    590
ATOM   2471  C   PRO A 154       8.871  48.792  51.861  1.00 38.67           C  
ANISOU 2471  C   PRO A 154     5243   5261   4188    160   -471    733
ATOM   2472  O   PRO A 154       9.733  49.617  51.569  1.00 39.28           O  
ANISOU 2472  O   PRO A 154     5354   5298   4272    145   -388    783
ATOM   2473  CB  PRO A 154       9.570  46.514  51.003  1.00 39.26           C  
ANISOU 2473  CB  PRO A 154     5404   5490   4021     93   -451    567
ATOM   2474  CG  PRO A 154       9.331  45.085  51.443  1.00 42.15           C  
ANISOU 2474  CG  PRO A 154     5728   5878   4408     91   -445    434
ATOM   2475  CD  PRO A 154       8.195  45.225  52.449  1.00 40.49           C  
ANISOU 2475  CD  PRO A 154     5406   5612   4366    133   -508    433
ATOM   2476  HA  PRO A 154      10.225  47.441  52.844  1.00  0.00           H  
ATOM   2477  HB3 PRO A 154      10.573  46.649  50.600  1.00  0.00           H  
ATOM   2478  HB2 PRO A 154       8.864  46.766  50.210  1.00  0.00           H  
ATOM   2479  HG3 PRO A 154      10.226  44.701  51.932  1.00  0.00           H  
ATOM   2480  HG2 PRO A 154       9.094  44.414  50.617  1.00  0.00           H  
ATOM   2481  HD2 PRO A 154       7.237  45.184  51.928  1.00  0.00           H  
ATOM   2482  HD3 PRO A 154       8.229  44.410  53.168  1.00  0.00           H  
ATOM   2483  N   ALA A 155       7.561  49.064  51.827  1.00 39.27           N  
ANISOU 2483  N   ALA A 155     5279   5319   4322    195   -605    798
ATOM   2484  CA  ALA A 155       7.011  50.387  51.521  1.00 40.58           C  
ANISOU 2484  CA  ALA A 155     5446   5411   4562    229   -670    947
ATOM   2485  C   ALA A 155       7.134  51.384  52.689  1.00 40.93           C  
ANISOU 2485  C   ALA A 155     5418   5331   4800    269   -581    948
ATOM   2486  O   ALA A 155       7.043  52.585  52.454  1.00 41.53           O  
ANISOU 2486  O   ALA A 155     5517   5326   4936    285   -585   1062
ATOM   2487  CB  ALA A 155       5.541  50.218  51.112  1.00 40.29           C  
ANISOU 2487  CB  ALA A 155     5357   5380   4572    265   -852   1016
ATOM   2488  H   ALA A 155       6.897  48.353  52.087  1.00  0.00           H  
ATOM   2489  HA  ALA A 155       7.556  50.816  50.678  1.00  0.00           H  
ATOM   2490  HB1 ALA A 155       5.081  51.183  50.897  1.00  0.00           H  
ATOM   2491  HB2 ALA A 155       5.445  49.603  50.217  1.00  0.00           H  
ATOM   2492  HB3 ALA A 155       4.955  49.755  51.908  1.00  0.00           H  
ATOM   2493  N   ASN A 156       7.321  50.873  53.913  1.00 39.98           N  
ANISOU 2493  N   ASN A 156     5224   5194   4773    280   -503    821
ATOM   2494  CA  ASN A 156       7.352  51.659  55.156  1.00 40.65           C  
ANISOU 2494  CA  ASN A 156     5257   5173   5015    303   -407    784
ATOM   2495  C   ASN A 156       8.809  51.900  55.599  1.00 40.46           C  
ANISOU 2495  C   ASN A 156     5280   5144   4947    252   -285    730
ATOM   2496  O   ASN A 156       9.042  52.657  56.545  1.00 37.32           O  
ANISOU 2496  O   ASN A 156     4853   4666   4660    256   -213    681
ATOM   2497  CB  ASN A 156       6.549  50.944  56.282  1.00 41.54           C  
ANISOU 2497  CB  ASN A 156     5273   5271   5238    332   -391    678
ATOM   2498  CG  ASN A 156       5.045  50.768  56.009  1.00 41.82           C  
ANISOU 2498  CG  ASN A 156     5224   5290   5376    385   -499    727
ATOM   2499  OD1 ASN A 156       4.639  50.097  55.065  1.00 48.95           O  
ANISOU 2499  OD1 ASN A 156     6130   6165   6305    414   -597    849
ATOM   2500  ND2 ASN A 156       4.167  51.315  56.838  1.00 46.40           N  
ANISOU 2500  ND2 ASN A 156     5722   5883   6025    394   -484    639
ATOM   2501  H   ASN A 156       7.393  49.870  54.031  1.00  0.00           H  
ATOM   2502  HA  ASN A 156       6.895  52.636  54.988  1.00  0.00           H  
ATOM   2503  HB3 ASN A 156       6.658  51.508  57.209  1.00  0.00           H  
ATOM   2504  HB2 ASN A 156       6.975  49.960  56.483  1.00  0.00           H  
ATOM   2505 HD22 ASN A 156       3.187  51.169  56.671  1.00  0.00           H  
ATOM   2506 HD21 ASN A 156       4.414  51.872  57.653  1.00  0.00           H  
ATOM   2507  N   ILE A 157       9.767  51.265  54.909  1.00 39.25           N  
ANISOU 2507  N   ILE A 157     5195   5076   4642    202   -261    727
ATOM   2508  CA  ILE A 157      11.196  51.487  55.070  1.00 38.16           C  
ANISOU 2508  CA  ILE A 157     5084   4933   4480    152   -153    698
ATOM   2509  C   ILE A 157      11.614  52.415  53.914  1.00 40.00           C  
ANISOU 2509  C   ILE A 157     5392   5143   4664    123   -137    828
ATOM   2510  O   ILE A 157      11.860  51.946  52.797  1.00 39.69           O  
ANISOU 2510  O   ILE A 157     5425   5182   4472     90   -140    872
ATOM   2511  CB  ILE A 157      12.016  50.161  54.977  1.00 38.22           C  
ANISOU 2511  CB  ILE A 157     5102   5038   4383    119   -108    603
ATOM   2512  CG1 ILE A 157      11.473  49.022  55.874  1.00 40.18           C  
ANISOU 2512  CG1 ILE A 157     5298   5316   4653    145   -146    503
ATOM   2513  CG2 ILE A 157      13.517  50.405  55.244  1.00 35.50           C  
ANISOU 2513  CG2 ILE A 157     4744   4674   4071     75     -5    563
ATOM   2514  CD1 ILE A 157      11.461  49.315  57.379  1.00 37.33           C  
ANISOU 2514  CD1 ILE A 157     4878   4889   4417    163   -126    444
ATOM   2515  H   ILE A 157       9.497  50.733  54.095  1.00  0.00           H  
ATOM   2516  HA  ILE A 157      11.415  51.974  56.022  1.00  0.00           H  
ATOM   2517  HB  ILE A 157      11.940  49.773  53.960  1.00  0.00           H  
ATOM   2518 HG13 ILE A 157      12.053  48.116  55.696  1.00  0.00           H  
ATOM   2519 HG12 ILE A 157      10.459  48.770  55.564  1.00  0.00           H  
ATOM   2520 HG21 ILE A 157      14.077  49.475  55.246  1.00  0.00           H  
ATOM   2521 HG22 ILE A 157      13.971  51.048  54.489  1.00  0.00           H  
ATOM   2522 HG23 ILE A 157      13.675  50.879  56.211  1.00  0.00           H  
ATOM   2523 HD11 ILE A 157      11.379  48.386  57.943  1.00  0.00           H  
ATOM   2524 HD12 ILE A 157      12.375  49.800  57.707  1.00  0.00           H  
ATOM   2525 HD13 ILE A 157      10.621  49.954  57.654  1.00  0.00           H  
ATOM   2526  N   LEU A 158      11.634  53.723  54.189  1.00 39.83           N  
ANISOU 2526  N   LEU A 158     5361   5004   4767    130   -116    889
ATOM   2527  CA  LEU A 158      12.083  54.730  53.235  1.00 42.41           C  
ANISOU 2527  CA  LEU A 158     5760   5285   5069     96    -93   1027
ATOM   2528  C   LEU A 158      13.617  54.809  53.253  1.00 41.60           C  
ANISOU 2528  C   LEU A 158     5673   5202   4930     18     37    990
ATOM   2529  O   LEU A 158      14.234  54.487  54.272  1.00 38.82           O  
ANISOU 2529  O   LEU A 158     5260   4867   4624      4     89    864
ATOM   2530  CB  LEU A 158      11.477  56.107  53.569  1.00 41.79           C  
ANISOU 2530  CB  LEU A 158     5659   5049   5169    133   -113   1104
ATOM   2531  CG  LEU A 158       9.956  56.157  53.817  1.00 45.01           C  
ANISOU 2531  CG  LEU A 158     6004   5400   5696    222   -216   1117
ATOM   2532  CD1 LEU A 158       9.542  57.591  54.174  1.00 41.30           C  
ANISOU 2532  CD1 LEU A 158     5518   4752   5421    255   -206   1192
ATOM   2533  CD2 LEU A 158       9.127  55.632  52.635  1.00 42.06           C  
ANISOU 2533  CD2 LEU A 158     5659   5107   5215    251   -350   1212
ATOM   2534  H   LEU A 158      11.498  54.056  55.137  1.00  0.00           H  
ATOM   2535  HA  LEU A 158      11.759  54.451  52.237  1.00  0.00           H  
ATOM   2536  HB3 LEU A 158      11.713  56.773  52.741  1.00  0.00           H  
ATOM   2537  HB2 LEU A 158      11.985  56.519  54.438  1.00  0.00           H  
ATOM   2538  HG  LEU A 158       9.735  55.536  54.686  1.00  0.00           H  
ATOM   2539 HD11 LEU A 158       8.562  57.610  54.648  1.00  0.00           H  
ATOM   2540 HD12 LEU A 158      10.247  58.063  54.858  1.00  0.00           H  
ATOM   2541 HD13 LEU A 158       9.490  58.210  53.279  1.00  0.00           H  
ATOM   2542 HD21 LEU A 158       8.204  56.196  52.498  1.00  0.00           H  
ATOM   2543 HD22 LEU A 158       9.681  55.693  51.701  1.00  0.00           H  
ATOM   2544 HD23 LEU A 158       8.847  54.589  52.788  1.00  0.00           H  
ATOM   2545  N   VAL A 159      14.203  55.267  52.146  1.00 39.91           N  
ANISOU 2545  N   VAL A 159     5541   4990   4635    -34     85   1107
ATOM   2546  CA  VAL A 159      15.632  55.520  52.017  1.00 40.14           C  
ANISOU 2546  CA  VAL A 159     5568   5014   4669   -114    223   1093
ATOM   2547  C   VAL A 159      15.803  56.921  51.391  1.00 41.23           C  
ANISOU 2547  C   VAL A 159     5771   5047   4848   -156    260   1252
ATOM   2548  O   VAL A 159      15.134  57.257  50.409  1.00 43.21           O  
ANISOU 2548  O   VAL A 159     6120   5309   4990   -154    210   1396
ATOM   2549  CB  VAL A 159      16.333  54.454  51.119  1.00 40.39           C  
ANISOU 2549  CB  VAL A 159     5635   5181   4529   -158    300   1050
ATOM   2550  CG1 VAL A 159      17.850  54.691  50.954  1.00 40.67           C  
ANISOU 2550  CG1 VAL A 159     5625   5203   4623   -234    452   1016
ATOM   2551  CG2 VAL A 159      16.102  53.018  51.634  1.00 36.68           C  
ANISOU 2551  CG2 VAL A 159     5114   4800   4023   -111    251    909
ATOM   2552  H   VAL A 159      13.638  55.570  51.353  1.00  0.00           H  
ATOM   2553  HA  VAL A 159      16.106  55.522  53.000  1.00  0.00           H  
ATOM   2554  HB  VAL A 159      15.892  54.505  50.123  1.00  0.00           H  
ATOM   2555 HG11 VAL A 159      18.316  53.891  50.378  1.00  0.00           H  
ATOM   2556 HG12 VAL A 159      18.066  55.622  50.428  1.00  0.00           H  
ATOM   2557 HG13 VAL A 159      18.352  54.732  51.922  1.00  0.00           H  
ATOM   2558 HG21 VAL A 159      16.635  52.287  51.027  1.00  0.00           H  
ATOM   2559 HG22 VAL A 159      16.444  52.909  52.664  1.00  0.00           H  
ATOM   2560 HG23 VAL A 159      15.048  52.743  51.606  1.00  0.00           H  
ATOM   2561  N   MET A 160      16.666  57.735  52.000  1.00 42.61           N  
ANISOU 2561  N   MET A 160     5894   5117   5179   -200    337   1229
ATOM   2562  CA  MET A 160      16.989  59.092  51.560  1.00 45.21           C  
ANISOU 2562  CA  MET A 160     6275   5318   5582   -250    384   1374
ATOM   2563  C   MET A 160      17.835  59.095  50.274  1.00 46.24           C  
ANISOU 2563  C   MET A 160     6489   5516   5563   -338    497   1475
ATOM   2564  O   MET A 160      18.759  58.291  50.149  1.00 46.35           O  
ANISOU 2564  O   MET A 160     6469   5636   5505   -384    595   1384
ATOM   2565  CB  MET A 160      17.746  59.809  52.694  1.00 44.05           C  
ANISOU 2565  CB  MET A 160     6049   5043   5645   -291    443   1298
ATOM   2566  CG  MET A 160      16.940  60.045  53.984  1.00 44.38           C  
ANISOU 2566  CG  MET A 160     6027   5007   5830   -221    361   1186
ATOM   2567  SD  MET A 160      15.532  61.182  53.869  1.00 45.11           S  
ANISOU 2567  SD  MET A 160     6162   4967   6012   -125    255   1307
ATOM   2568  CE  MET A 160      16.384  62.775  53.743  1.00 44.75           C  
ANISOU 2568  CE  MET A 160     6141   4707   6155   -191    329   1398
ATOM   2569  H   MET A 160      17.123  57.428  52.850  1.00  0.00           H  
ATOM   2570  HA  MET A 160      16.057  59.622  51.363  1.00  0.00           H  
ATOM   2571  HB3 MET A 160      18.144  60.761  52.341  1.00  0.00           H  
ATOM   2572  HB2 MET A 160      18.608  59.194  52.946  1.00  0.00           H  
ATOM   2573  HG3 MET A 160      17.607  60.415  54.764  1.00  0.00           H  
ATOM   2574  HG2 MET A 160      16.553  59.097  54.349  1.00  0.00           H  
ATOM   2575  HE1 MET A 160      15.655  63.584  53.698  1.00  0.00           H  
ATOM   2576  HE2 MET A 160      17.023  62.936  54.611  1.00  0.00           H  
ATOM   2577  HE3 MET A 160      16.997  62.815  52.843  1.00  0.00           H  
ATOM   2578  N   GLY A 161      17.522  60.036  49.368  1.00 48.13           N  
ANISOU 2578  N   GLY A 161     6838   5687   5763   -361    489   1667
ATOM   2579  CA  GLY A 161      18.267  60.274  48.130  1.00 52.25           C  
ANISOU 2579  CA  GLY A 161     7465   6257   6132   -458    611   1790
ATOM   2580  C   GLY A 161      19.450  61.221  48.390  1.00 54.74           C  
ANISOU 2580  C   GLY A 161     7749   6444   6605   -553    749   1836
ATOM   2581  O   GLY A 161      19.903  61.372  49.525  1.00 54.44           O  
ANISOU 2581  O   GLY A 161     7589   6326   6770   -559    768   1716
ATOM   2582  H   GLY A 161      16.765  60.673  49.566  1.00  0.00           H  
ATOM   2583  HA3 GLY A 161      17.594  60.721  47.398  1.00  0.00           H  
ATOM   2584  HA2 GLY A 161      18.630  59.338  47.703  1.00  0.00           H  
ATOM   2585  N   GLU A 162      19.951  61.855  47.314  1.00 59.80           N  
ANISOU 2585  N   GLU A 162     8510   7064   7148   -637    839   2015
ATOM   2586  CA  GLU A 162      21.049  62.832  47.327  1.00 62.57           C  
ANISOU 2586  CA  GLU A 162     8839   7300   7636   -751    996   2076
ATOM   2587  C   GLU A 162      20.784  64.015  48.281  1.00 63.01           C  
ANISOU 2587  C   GLU A 162     8827   7145   7970   -729    931   2078
ATOM   2588  O   GLU A 162      19.700  64.598  48.237  1.00 63.46           O  
ANISOU 2588  O   GLU A 162     8931   7104   8075   -645    789   2163
ATOM   2589  CB  GLU A 162      21.279  63.362  45.891  1.00 66.60           C  
ANISOU 2589  CB  GLU A 162     9523   7808   7975   -839   1086   2306
ATOM   2590  CG  GLU A 162      21.694  62.311  44.836  1.00 70.18           C  
ANISOU 2590  CG  GLU A 162    10059   8463   8143   -892   1206   2289
ATOM   2591  CD  GLU A 162      23.066  61.665  45.057  1.00 73.32           C  
ANISOU 2591  CD  GLU A 162    10328   8925   8605   -976   1421   2135
ATOM   2592  OE1 GLU A 162      23.851  62.190  45.876  1.00 75.53           O  
ANISOU 2592  OE1 GLU A 162    10478   9087   9131  -1028   1493   2093
ATOM   2593  OE2 GLU A 162      23.320  60.638  44.389  1.00 68.69           O1-
ANISOU 2593  OE2 GLU A 162     9763   8502   7832   -989   1514   2051
ATOM   2594  H   GLU A 162      19.538  61.685  46.410  1.00  0.00           H  
ATOM   2595  HA  GLU A 162      21.942  62.309  47.673  1.00  0.00           H  
ATOM   2596  HB3 GLU A 162      22.029  64.155  45.911  1.00  0.00           H  
ATOM   2597  HB2 GLU A 162      20.365  63.846  45.542  1.00  0.00           H  
ATOM   2598  HG3 GLU A 162      21.715  62.784  43.854  1.00  0.00           H  
ATOM   2599  HG2 GLU A 162      20.942  61.524  44.774  1.00  0.00           H  
ATOM   2600  N   GLY A 163      21.788  64.343  49.108  1.00 62.24           N  
ANISOU 2600  N   GLY A 163     8611   6975   8063   -805   1034   1973
ATOM   2601  CA  GLY A 163      21.696  65.391  50.122  1.00 61.75           C  
ANISOU 2601  CA  GLY A 163     8476   6720   8265   -799    984   1919
ATOM   2602  C   GLY A 163      22.561  65.014  51.339  1.00 60.81           C  
ANISOU 2602  C   GLY A 163     8196   6621   8290   -837   1017   1697
ATOM   2603  O   GLY A 163      23.390  64.107  51.243  1.00 61.90           O  
ANISOU 2603  O   GLY A 163     8263   6902   8353   -877   1097   1609
ATOM   2604  H   GLY A 163      22.648  63.813  49.085  1.00  0.00           H  
ATOM   2605  HA3 GLY A 163      20.661  65.528  50.441  1.00  0.00           H  
ATOM   2606  HA2 GLY A 163      22.046  66.332  49.697  1.00  0.00           H  
ATOM   2607  N   PRO A 164      22.398  65.719  52.484  1.00 60.73           N  
ANISOU 2607  N   PRO A 164     8127   6459   8488   -827    954   1603
ATOM   2608  CA  PRO A 164      23.183  65.490  53.718  1.00 59.61           C  
ANISOU 2608  CA  PRO A 164     7846   6330   8474   -871    954   1395
ATOM   2609  C   PRO A 164      23.087  64.085  54.342  1.00 58.10           C  
ANISOU 2609  C   PRO A 164     7589   6318   8169   -793    879   1234
ATOM   2610  O   PRO A 164      24.079  63.620  54.900  1.00 59.46           O  
ANISOU 2610  O   PRO A 164     7647   6555   8390   -844    899   1103
ATOM   2611  CB  PRO A 164      22.667  66.564  54.693  1.00 60.86           C  
ANISOU 2611  CB  PRO A 164     8005   6284   8835   -861    887   1339
ATOM   2612  CG  PRO A 164      22.100  67.656  53.804  1.00 61.70           C  
ANISOU 2612  CG  PRO A 164     8224   6232   8988   -859    909   1545
ATOM   2613  CD  PRO A 164      21.514  66.876  52.636  1.00 61.72           C  
ANISOU 2613  CD  PRO A 164     8319   6371   8760   -795    897   1698
ATOM   2614  HA  PRO A 164      24.227  65.700  53.475  1.00  0.00           H  
ATOM   2615  HB3 PRO A 164      23.448  66.937  55.357  1.00  0.00           H  
ATOM   2616  HB2 PRO A 164      21.867  66.167  55.320  1.00  0.00           H  
ATOM   2617  HG3 PRO A 164      22.914  68.289  53.445  1.00  0.00           H  
ATOM   2618  HG2 PRO A 164      21.375  68.294  54.308  1.00  0.00           H  
ATOM   2619  HD2 PRO A 164      20.510  66.520  52.872  1.00  0.00           H  
ATOM   2620  HD3 PRO A 164      21.454  67.505  51.746  1.00  0.00           H  
ATOM   2621  N   GLU A 165      21.910  63.444  54.233  1.00 57.22           N  
ANISOU 2621  N   GLU A 165     7541   6277   7922   -674    786   1250
ATOM   2622  CA  GLU A 165      21.633  62.114  54.778  1.00 53.58           C  
ANISOU 2622  CA  GLU A 165     7031   5970   7358   -599    713   1111
ATOM   2623  C   GLU A 165      21.575  61.054  53.663  1.00 51.74           C  
ANISOU 2623  C   GLU A 165     6833   5912   6913   -570    742   1158
ATOM   2624  O   GLU A 165      20.682  60.212  53.689  1.00 48.88           O  
ANISOU 2624  O   GLU A 165     6468   5654   6448   -487    664   1087
ATOM   2625  CB  GLU A 165      20.325  62.148  55.603  1.00 52.91           C  
ANISOU 2625  CB  GLU A 165     6973   5833   7297   -493    593   1061
ATOM   2626  CG  GLU A 165      20.363  63.091  56.817  1.00 54.06           C  
ANISOU 2626  CG  GLU A 165     7085   5825   7631   -519    572    959
ATOM   2627  CD  GLU A 165      19.156  62.855  57.724  1.00 52.91           C  
ANISOU 2627  CD  GLU A 165     6952   5653   7500   -418    483    874
ATOM   2628  OE1 GLU A 165      19.357  62.241  58.796  1.00 46.65           O  
ANISOU 2628  OE1 GLU A 165     6113   4942   6672   -404    442    722
ATOM   2629  OE2 GLU A 165      18.040  63.245  57.318  1.00 56.29           O1-
ANISOU 2629  OE2 GLU A 165     7434   5977   7978   -351    457    966
ATOM   2630  H   GLU A 165      21.144  63.891  53.752  1.00  0.00           H  
ATOM   2631  HA  GLU A 165      22.434  61.802  55.450  1.00  0.00           H  
ATOM   2632  HB3 GLU A 165      20.094  61.143  55.956  1.00  0.00           H  
ATOM   2633  HB2 GLU A 165      19.493  62.433  54.956  1.00  0.00           H  
ATOM   2634  HG3 GLU A 165      20.371  64.133  56.497  1.00  0.00           H  
ATOM   2635  HG2 GLU A 165      21.278  62.932  57.388  1.00  0.00           H  
ATOM   2636  N   ARG A 166      22.518  61.102  52.704  1.00 51.76           N  
ANISOU 2636  N   ARG A 166     6871   5940   6855   -647    866   1267
ATOM   2637  CA  ARG A 166      22.579  60.214  51.538  1.00 50.49           C  
ANISOU 2637  CA  ARG A 166     6765   5936   6481   -640    925   1307
ATOM   2638  C   ARG A 166      22.573  58.720  51.909  1.00 48.49           C  
ANISOU 2638  C   ARG A 166     6434   5828   6162   -584    893   1146
ATOM   2639  O   ARG A 166      23.438  58.290  52.669  1.00 48.60           O  
ANISOU 2639  O   ARG A 166     6320   5855   6290   -612    919   1022
ATOM   2640  CB  ARG A 166      23.809  60.584  50.687  1.00 54.98           C  
ANISOU 2640  CB  ARG A 166     7336   6508   7046   -761   1111   1387
ATOM   2641  CG  ARG A 166      23.872  59.884  49.318  1.00 54.81           C  
ANISOU 2641  CG  ARG A 166     7392   6634   6799   -778   1218   1430
ATOM   2642  CD  ARG A 166      25.138  60.264  48.543  1.00 59.08           C  
ANISOU 2642  CD  ARG A 166     7912   7163   7373   -909   1433   1491
ATOM   2643  NE  ARG A 166      25.031  59.876  47.134  1.00 59.44           N  
ANISOU 2643  NE  ARG A 166     8103   7315   7167   -942   1548   1591
ATOM   2644  CZ  ARG A 166      25.236  58.664  46.596  1.00 58.86           C  
ANISOU 2644  CZ  ARG A 166     8030   7394   6940   -926   1626   1495
ATOM   2645  NH1 ARG A 166      25.652  57.615  47.318  1.00 53.46           N  
ANISOU 2645  NH1 ARG A 166     7195   6771   6345   -871   1602   1307
ATOM   2646  NH2 ARG A 166      25.011  58.504  45.289  1.00 62.58           N1+
ANISOU 2646  NH2 ARG A 166     8664   7951   7160   -970   1731   1591
ATOM   2647  H   ARG A 166      23.227  61.820  52.749  1.00  0.00           H  
ATOM   2648  HA  ARG A 166      21.689  60.418  50.946  1.00  0.00           H  
ATOM   2649  HB3 ARG A 166      24.724  60.378  51.247  1.00  0.00           H  
ATOM   2650  HB2 ARG A 166      23.799  61.658  50.508  1.00  0.00           H  
ATOM   2651  HG3 ARG A 166      22.975  60.067  48.724  1.00  0.00           H  
ATOM   2652  HG2 ARG A 166      23.908  58.808  49.492  1.00  0.00           H  
ATOM   2653  HD3 ARG A 166      25.999  59.728  48.943  1.00  0.00           H  
ATOM   2654  HD2 ARG A 166      25.359  61.326  48.648  1.00  0.00           H  
ATOM   2655  HE  ARG A 166      24.673  60.609  46.525  1.00  0.00           H  
ATOM   2656 HH12 ARG A 166      25.796  56.723  46.868  1.00  0.00           H  
ATOM   2657 HH11 ARG A 166      25.825  57.698  48.317  1.00  0.00           H  
ATOM   2658 HH22 ARG A 166      25.183  57.608  44.850  1.00  0.00           H  
ATOM   2659 HH21 ARG A 166      24.601  59.268  44.755  1.00  0.00           H  
ATOM   2660  N   GLY A 167      21.585  57.985  51.372  1.00 46.08           N  
ANISOU 2660  N   GLY A 167     6206   5621   5683   -508    822   1155
ATOM   2661  CA  GLY A 167      21.400  56.545  51.554  1.00 43.58           C  
ANISOU 2661  CA  GLY A 167     5837   5430   5292   -453    791   1018
ATOM   2662  C   GLY A 167      21.012  56.124  52.977  1.00 42.23           C  
ANISOU 2662  C   GLY A 167     5572   5241   5232   -394    678    884
ATOM   2663  O   GLY A 167      21.065  54.933  53.268  1.00 42.34           O  
ANISOU 2663  O   GLY A 167     5518   5337   5233   -368    671    769
ATOM   2664  H   GLY A 167      20.903  58.444  50.782  1.00  0.00           H  
ATOM   2665  HA3 GLY A 167      22.294  56.005  51.252  1.00  0.00           H  
ATOM   2666  HA2 GLY A 167      20.601  56.221  50.890  1.00  0.00           H  
ATOM   2667  N   ARG A 168      20.628  57.055  53.864  1.00 42.92           N  
ANISOU 2667  N   ARG A 168     5665   5216   5426   -372    595    898
ATOM   2668  CA  ARG A 168      20.165  56.740  55.214  1.00 41.62           C  
ANISOU 2668  CA  ARG A 168     5439   5031   5343   -324    498    775
ATOM   2669  C   ARG A 168      18.719  56.221  55.177  1.00 39.97           C  
ANISOU 2669  C   ARG A 168     5280   4856   5050   -230    395    776
ATOM   2670  O   ARG A 168      17.862  56.865  54.572  1.00 40.26           O  
ANISOU 2670  O   ARG A 168     5387   4843   5066   -199    358    882
ATOM   2671  CB  ARG A 168      20.319  57.994  56.094  1.00 41.90           C  
ANISOU 2671  CB  ARG A 168     5453   4921   5547   -360    485    761
ATOM   2672  CG  ARG A 168      19.899  57.814  57.565  1.00 45.01           C  
ANISOU 2672  CG  ARG A 168     5807   5295   5998   -324    398    628
ATOM   2673  CD  ARG A 168      20.355  58.972  58.463  1.00 46.97           C  
ANISOU 2673  CD  ARG A 168     6039   5406   6402   -380    402    586
ATOM   2674  NE  ARG A 168      21.801  58.939  58.712  1.00 48.70           N  
ANISOU 2674  NE  ARG A 168     6175   5629   6701   -475    438    531
ATOM   2675  CZ  ARG A 168      22.537  59.951  59.200  1.00 52.81           C  
ANISOU 2675  CZ  ARG A 168     6672   6029   7366   -560    460    511
ATOM   2676  NH1 ARG A 168      21.993  61.143  59.488  1.00 52.15           N  
ANISOU 2676  NH1 ARG A 168     6651   5797   7366   -559    461    538
ATOM   2677  NH2 ARG A 168      23.847  59.760  59.401  1.00 58.18           N1+
ANISOU 2677  NH2 ARG A 168     7254   6726   8124   -647    480    460
ATOM   2678  H   ARG A 168      20.611  58.030  53.595  1.00  0.00           H  
ATOM   2679  HA  ARG A 168      20.812  55.964  55.628  1.00  0.00           H  
ATOM   2680  HB3 ARG A 168      19.736  58.811  55.669  1.00  0.00           H  
ATOM   2681  HB2 ARG A 168      21.363  58.310  56.053  1.00  0.00           H  
ATOM   2682  HG3 ARG A 168      20.403  56.913  57.916  1.00  0.00           H  
ATOM   2683  HG2 ARG A 168      18.833  57.630  57.686  1.00  0.00           H  
ATOM   2684  HD3 ARG A 168      19.760  59.089  59.365  1.00  0.00           H  
ATOM   2685  HD2 ARG A 168      20.212  59.885  57.888  1.00  0.00           H  
ATOM   2686  HE  ARG A 168      22.255  58.051  58.550  1.00  0.00           H  
ATOM   2687 HH12 ARG A 168      22.561  61.892  59.857  1.00  0.00           H  
ATOM   2688 HH11 ARG A 168      21.011  61.324  59.303  1.00  0.00           H  
ATOM   2689 HH22 ARG A 168      24.423  60.505  59.765  1.00  0.00           H  
ATOM   2690 HH21 ARG A 168      24.275  58.871  59.177  1.00  0.00           H  
ATOM   2691  N   VAL A 169      18.472  55.088  55.852  1.00 37.06           N  
ANISOU 2691  N   VAL A 169     4868   4563   4650   -188    343    664
ATOM   2692  CA  VAL A 169      17.135  54.533  56.076  1.00 35.87           C  
ANISOU 2692  CA  VAL A 169     4743   4442   4445   -109    252    648
ATOM   2693  C   VAL A 169      16.313  55.457  56.997  1.00 36.09           C  
ANISOU 2693  C   VAL A 169     4767   4357   4586    -78    205    635
ATOM   2694  O   VAL A 169      16.874  56.005  57.943  1.00 38.87           O  
ANISOU 2694  O   VAL A 169     5087   4642   5040   -114    223    567
ATOM   2695  CB  VAL A 169      17.231  53.124  56.734  1.00 35.75           C  
ANISOU 2695  CB  VAL A 169     4682   4519   4384    -84    222    533
ATOM   2696  CG1 VAL A 169      15.916  52.561  57.316  1.00 30.87           C  
ANISOU 2696  CG1 VAL A 169     4073   3911   3747    -17    137    502
ATOM   2697  CG2 VAL A 169      17.845  52.100  55.764  1.00 36.18           C  
ANISOU 2697  CG2 VAL A 169     4746   4675   4326    -96    272    537
ATOM   2698  H   VAL A 169      19.234  54.612  56.318  1.00  0.00           H  
ATOM   2699  HA  VAL A 169      16.639  54.446  55.110  1.00  0.00           H  
ATOM   2700  HB  VAL A 169      17.917  53.214  57.573  1.00  0.00           H  
ATOM   2701 HG11 VAL A 169      16.033  51.524  57.631  1.00  0.00           H  
ATOM   2702 HG12 VAL A 169      15.587  53.113  58.196  1.00  0.00           H  
ATOM   2703 HG13 VAL A 169      15.117  52.600  56.576  1.00  0.00           H  
ATOM   2704 HG21 VAL A 169      17.939  51.118  56.228  1.00  0.00           H  
ATOM   2705 HG22 VAL A 169      17.224  51.988  54.876  1.00  0.00           H  
ATOM   2706 HG23 VAL A 169      18.842  52.400  55.439  1.00  0.00           H  
ATOM   2707  N   LYS A 170      15.022  55.617  56.707  1.00 34.89           N  
ANISOU 2707  N   LYS A 170     4647   4183   4426    -15    147    696
ATOM   2708  CA  LYS A 170      14.059  56.307  57.551  1.00 34.64           C  
ANISOU 2708  CA  LYS A 170     4597   4050   4514     31    115    666
ATOM   2709  C   LYS A 170      12.847  55.383  57.659  1.00 34.59           C  
ANISOU 2709  C   LYS A 170     4571   4106   4465    101     47    639
ATOM   2710  O   LYS A 170      12.109  55.232  56.685  1.00 36.38           O  
ANISOU 2710  O   LYS A 170     4818   4371   4634    136    -10    728
ATOM   2711  CB  LYS A 170      13.661  57.666  56.930  1.00 36.18           C  
ANISOU 2711  CB  LYS A 170     4824   4113   4810     45    116    785
ATOM   2712  CG  LYS A 170      14.789  58.704  56.813  1.00 38.39           C  
ANISOU 2712  CG  LYS A 170     5126   4313   5147    -33    188    830
ATOM   2713  CD  LYS A 170      15.267  59.266  58.159  1.00 39.16           C  
ANISOU 2713  CD  LYS A 170     5190   4314   5373    -73    229    708
ATOM   2714  CE  LYS A 170      16.358  60.331  57.980  1.00 39.76           C  
ANISOU 2714  CE  LYS A 170     5279   4293   5534   -159    295    758
ATOM   2715  NZ  LYS A 170      16.776  60.897  59.270  1.00 36.51           N1+
ANISOU 2715  NZ  LYS A 170     4842   3783   5248   -213    320    630
ATOM   2716  H   LYS A 170      14.634  55.148  55.887  1.00  0.00           H  
ATOM   2717  HA  LYS A 170      14.459  56.469  58.555  1.00  0.00           H  
ATOM   2718  HB3 LYS A 170      12.846  58.097  57.512  1.00  0.00           H  
ATOM   2719  HB2 LYS A 170      13.256  57.502  55.933  1.00  0.00           H  
ATOM   2720  HG3 LYS A 170      14.437  59.525  56.187  1.00  0.00           H  
ATOM   2721  HG2 LYS A 170      15.633  58.264  56.283  1.00  0.00           H  
ATOM   2722  HD3 LYS A 170      15.655  58.456  58.777  1.00  0.00           H  
ATOM   2723  HD2 LYS A 170      14.425  59.691  58.706  1.00  0.00           H  
ATOM   2724  HE3 LYS A 170      16.003  61.144  57.344  1.00  0.00           H  
ATOM   2725  HE2 LYS A 170      17.232  59.899  57.491  1.00  0.00           H  
ATOM   2726  HZ1 LYS A 170      15.994  61.346  59.722  1.00  0.00           H  
ATOM   2727  HZ2 LYS A 170      17.135  60.156  59.857  1.00  0.00           H  
ATOM   2728  HZ3 LYS A 170      17.507  61.579  59.099  1.00  0.00           H  
ATOM   2729  N   ILE A 171      12.659  54.759  58.824  1.00 34.77           N  
ANISOU 2729  N   ILE A 171     4559   4140   4514    112     51    519
ATOM   2730  CA  ILE A 171      11.458  53.981  59.099  1.00 34.87           C  
ANISOU 2730  CA  ILE A 171     4541   4190   4517    169      5    488
ATOM   2731  C   ILE A 171      10.287  54.957  59.334  1.00 34.33           C  
ANISOU 2731  C   ILE A 171     4446   4010   4587    230     -7    532
ATOM   2732  O   ILE A 171      10.390  55.849  60.183  1.00 33.88           O  
ANISOU 2732  O   ILE A 171     4390   3837   4646    227     45    501
ATOM   2733  CB  ILE A 171      11.660  53.038  60.316  1.00 37.71           C  
ANISOU 2733  CB  ILE A 171     4884   4592   4853    152     27    359
ATOM   2734  CG1 ILE A 171      12.822  52.060  60.018  1.00 38.16           C  
ANISOU 2734  CG1 ILE A 171     4950   4747   4802    108     23    334
ATOM   2735  CG2 ILE A 171      10.382  52.259  60.690  1.00 37.11           C  
ANISOU 2735  CG2 ILE A 171     4773   4547   4780    199      0    329
ATOM   2736  CD1 ILE A 171      13.213  51.144  61.180  1.00 45.91           C  
ANISOU 2736  CD1 ILE A 171     5925   5755   5763     83     28    232
ATOM   2737  H   ILE A 171      13.309  54.857  59.595  1.00  0.00           H  
ATOM   2738  HA  ILE A 171      11.233  53.360  58.227  1.00  0.00           H  
ATOM   2739  HB  ILE A 171      11.941  53.644  61.179  1.00  0.00           H  
ATOM   2740 HG13 ILE A 171      13.717  52.604  59.718  1.00  0.00           H  
ATOM   2741 HG12 ILE A 171      12.558  51.450  59.156  1.00  0.00           H  
ATOM   2742 HG21 ILE A 171      10.554  51.577  61.521  1.00  0.00           H  
ATOM   2743 HG22 ILE A 171       9.579  52.927  60.999  1.00  0.00           H  
ATOM   2744 HG23 ILE A 171      10.020  51.665  59.848  1.00  0.00           H  
ATOM   2745 HD11 ILE A 171      14.294  51.135  61.315  1.00  0.00           H  
ATOM   2746 HD12 ILE A 171      12.773  51.455  62.127  1.00  0.00           H  
ATOM   2747 HD13 ILE A 171      12.899  50.124  60.969  1.00  0.00           H  
ATOM   2748  N   ALA A 172       9.237  54.807  58.525  1.00 35.15           N  
ANISOU 2748  N   ALA A 172     4521   4142   4691    284    -81    601
ATOM   2749  CA  ALA A 172       8.084  55.693  58.469  1.00 36.21           C  
ANISOU 2749  CA  ALA A 172     4604   4170   4983    356   -111    659
ATOM   2750  C   ALA A 172       6.792  54.880  58.592  1.00 35.52           C  
ANISOU 2750  C   ALA A 172     4438   4130   4926    406   -164    634
ATOM   2751  O   ALA A 172       6.854  53.653  58.713  1.00 34.97           O  
ANISOU 2751  O   ALA A 172     4368   4173   4745    381   -181    580
ATOM   2752  CB  ALA A 172       8.133  56.459  57.140  1.00 34.91           C  
ANISOU 2752  CB  ALA A 172     4477   3963   4824    370   -182    828
ATOM   2753  H   ALA A 172       9.200  54.022  57.876  1.00  0.00           H  
ATOM   2754  HA  ALA A 172       8.106  56.403  59.295  1.00  0.00           H  
ATOM   2755  HB1 ALA A 172       7.349  57.212  57.081  1.00  0.00           H  
ATOM   2756  HB2 ALA A 172       9.088  56.972  57.019  1.00  0.00           H  
ATOM   2757  HB3 ALA A 172       8.004  55.784  56.292  1.00  0.00           H  
ATOM   2758  N   ASP A 173       5.655  55.599  58.570  1.00 37.55           N  
ANISOU 2758  N   ASP A 173     4620   4290   5358    478   -188    676
ATOM   2759  CA  ASP A 173       4.280  55.078  58.534  1.00 40.07           C  
ANISOU 2759  CA  ASP A 173     4834   4634   5756    531   -248    674
ATOM   2760  C   ASP A 173       4.037  53.943  59.547  1.00 40.27           C  
ANISOU 2760  C   ASP A 173     4828   4723   5750    504   -169    531
ATOM   2761  O   ASP A 173       3.685  52.826  59.171  1.00 39.22           O  
ANISOU 2761  O   ASP A 173     4652   4679   5572    499   -228    524
ATOM   2762  CB  ASP A 173       3.794  54.735  57.100  1.00 44.03           C  
ANISOU 2762  CB  ASP A 173     5345   5231   6155    531   -405    790
ATOM   2763  CG  ASP A 173       3.816  55.902  56.108  1.00 50.62           C  
ANISOU 2763  CG  ASP A 173     6196   5990   7047    571   -503    955
ATOM   2764  OD1 ASP A 173       3.725  57.062  56.561  1.00 59.66           O  
ANISOU 2764  OD1 ASP A 173     7249   7012   8406    647   -520    999
ATOM   2765  OD2 ASP A 173       3.780  55.614  54.892  1.00 65.30           O1-
ANISOU 2765  OD2 ASP A 173     8160   7909   8742    526   -558   1046
ATOM   2766  H   ASP A 173       5.720  56.597  58.425  1.00  0.00           H  
ATOM   2767  HA  ASP A 173       3.651  55.897  58.888  1.00  0.00           H  
ATOM   2768  HB3 ASP A 173       2.779  54.336  57.134  1.00  0.00           H  
ATOM   2769  HB2 ASP A 173       4.445  53.959  56.698  1.00  0.00           H  
ATOM   2770  N   MET A 174       4.310  54.250  60.819  1.00 37.87           N  
ANISOU 2770  N   MET A 174     4557   4370   5463    478    -39    421
ATOM   2771  CA  MET A 174       4.081  53.361  61.952  1.00 40.95           C  
ANISOU 2771  CA  MET A 174     4928   4792   5839    453     54    294
ATOM   2772  C   MET A 174       2.581  53.313  62.279  1.00 43.26           C  
ANISOU 2772  C   MET A 174     5089   5045   6301    514     69    284
ATOM   2773  O   MET A 174       1.900  54.339  62.205  1.00 45.60           O  
ANISOU 2773  O   MET A 174     5312   5232   6784    583     70    326
ATOM   2774  CB  MET A 174       4.892  53.884  63.154  1.00 42.30           C  
ANISOU 2774  CB  MET A 174     5164   4889   6019    420    182    186
ATOM   2775  CG  MET A 174       6.413  53.727  62.988  1.00 42.92           C  
ANISOU 2775  CG  MET A 174     5350   5026   5930    341    179    157
ATOM   2776  SD  MET A 174       7.435  55.008  63.761  1.00 44.87           S  
ANISOU 2776  SD  MET A 174     5651   5246   6152    324    115    263
ATOM   2777  CE  MET A 174       7.387  56.292  62.485  1.00 40.75           C  
ANISOU 2777  CE  MET A 174     5137   4543   5805    342    197    233
ATOM   2778  H   MET A 174       4.563  55.198  61.042  1.00  0.00           H  
ATOM   2779  HA  MET A 174       4.415  52.352  61.700  1.00  0.00           H  
ATOM   2780  HB3 MET A 174       4.590  53.345  64.054  1.00  0.00           H  
ATOM   2781  HB2 MET A 174       4.637  54.924  63.342  1.00  0.00           H  
ATOM   2782  HG3 MET A 174       6.690  53.673  61.935  1.00  0.00           H  
ATOM   2783  HG2 MET A 174       6.706  52.777  63.432  1.00  0.00           H  
ATOM   2784  HE1 MET A 174       7.930  57.174  62.823  1.00  0.00           H  
ATOM   2785  HE2 MET A 174       7.857  55.929  61.573  1.00  0.00           H  
ATOM   2786  HE3 MET A 174       6.360  56.582  62.263  1.00  0.00           H  
ATOM   2787  N   GLY A 175       2.094  52.138  62.685  1.00 44.46           N  
ANISOU 2787  N   GLY A 175     5203   5279   6410    489     80    235
ATOM   2788  CA  GLY A 175       0.708  51.882  63.057  1.00 45.48           C  
ANISOU 2788  CA  GLY A 175     5196   5374   6712    529    129    204
ATOM   2789  C   GLY A 175       0.462  52.388  64.479  1.00 45.77           C  
ANISOU 2789  C   GLY A 175     5241   5333   6816    523    320     79
ATOM   2790  O   GLY A 175       0.176  51.590  65.368  1.00 44.98           O  
ANISOU 2790  O   GLY A 175     5173   5283   6636    468    418     -7
ATOM   2791  H   GLY A 175       2.715  51.336  62.793  1.00  0.00           H  
ATOM   2792  HA3 GLY A 175       0.532  50.807  63.025  1.00  0.00           H  
ATOM   2793  HA2 GLY A 175       0.016  52.349  62.355  1.00  0.00           H  
ATOM   2794  N   PHE A 176       0.596  53.703  64.698  1.00 46.90           N  
ANISOU 2794  N   PHE A 176     5371   5348   7101    576    376     71
ATOM   2795  CA  PHE A 176       0.550  54.393  65.993  1.00 48.84           C  
ANISOU 2795  CA  PHE A 176     5654   5507   7394    564    565    -66
ATOM   2796  C   PHE A 176      -0.736  54.225  66.827  1.00 50.29           C  
ANISOU 2796  C   PHE A 176     5722   5659   7727    588    712   -151
ATOM   2797  O   PHE A 176      -0.703  54.498  68.027  1.00 51.31           O  
ANISOU 2797  O   PHE A 176     5919   5772   7803    541    885   -283
ATOM   2798  CB  PHE A 176       0.864  55.892  65.798  1.00 50.06           C  
ANISOU 2798  CB  PHE A 176     5827   5512   7680    612    590    -61
ATOM   2799  CG  PHE A 176       2.313  56.230  65.486  1.00 52.36           C  
ANISOU 2799  CG  PHE A 176     6265   5819   7811    553    531    -38
ATOM   2800  CD1 PHE A 176       3.341  55.854  66.377  1.00 53.24           C  
ANISOU 2800  CD1 PHE A 176     6506   6011   7712    456    573   -127
ATOM   2801  CD2 PHE A 176       2.637  57.006  64.354  1.00 53.90           C  
ANISOU 2801  CD2 PHE A 176     6463   5941   8077    591    432     79
ATOM   2802  CE1 PHE A 176       4.644  56.272  66.152  1.00 56.52           C  
ANISOU 2802  CE1 PHE A 176     7028   6437   8010    401    516   -108
ATOM   2803  CE2 PHE A 176       3.946  57.417  64.149  1.00 53.15           C  
ANISOU 2803  CE2 PHE A 176     6488   5853   7855    528    396     98
ATOM   2804  CZ  PHE A 176       4.941  57.062  65.052  1.00 55.87           C  
ANISOU 2804  CZ  PHE A 176     6937   6279   8010    434    438      0
ATOM   2805  H   PHE A 176       0.922  54.256  63.909  1.00  0.00           H  
ATOM   2806  HA  PHE A 176       1.335  53.949  66.606  1.00  0.00           H  
ATOM   2807  HB3 PHE A 176       0.599  56.460  66.691  1.00  0.00           H  
ATOM   2808  HB2 PHE A 176       0.228  56.289  65.006  1.00  0.00           H  
ATOM   2809  HD1 PHE A 176       3.123  55.255  67.247  1.00  0.00           H  
ATOM   2810  HD2 PHE A 176       1.871  57.302  63.651  1.00  0.00           H  
ATOM   2811  HE1 PHE A 176       5.430  55.986  66.836  1.00  0.00           H  
ATOM   2812  HE2 PHE A 176       4.191  58.018  63.286  1.00  0.00           H  
ATOM   2813  HZ  PHE A 176       5.959  57.380  64.889  1.00  0.00           H  
ATOM   2814  N   ALA A 177      -1.830  53.749  66.221  1.00 49.61           N  
ANISOU 2814  N   ALA A 177     5465   5566   7820    652    646    -79
ATOM   2815  CA  ALA A 177      -3.075  53.431  66.907  1.00 50.81           C  
ANISOU 2815  CA  ALA A 177     5472   5692   8142    672    787   -152
ATOM   2816  C   ALA A 177      -3.570  52.057  66.451  1.00 50.31           C  
ANISOU 2816  C   ALA A 177     5334   5750   8032    630    706   -107
ATOM   2817  O   ALA A 177      -3.683  51.814  65.250  1.00 52.69           O  
ANISOU 2817  O   ALA A 177     5548   6085   8386    663    515      9
ATOM   2818  CB  ALA A 177      -4.117  54.514  66.606  1.00 51.47           C  
ANISOU 2818  CB  ALA A 177     5375   5632   8550    789    798   -122
ATOM   2819  H   ALA A 177      -1.763  53.424  65.266  1.00  0.00           H  
ATOM   2820  HA  ALA A 177      -2.921  53.395  67.987  1.00  0.00           H  
ATOM   2821  HB1 ALA A 177      -5.090  54.253  67.023  1.00  0.00           H  
ATOM   2822  HB2 ALA A 177      -3.820  55.465  67.044  1.00  0.00           H  
ATOM   2823  HB3 ALA A 177      -4.247  54.654  65.533  1.00  0.00           H  
ATOM   2824  N   ARG A 178      -3.886  51.202  67.426  1.00 48.98           N  
ANISOU 2824  N   ARG A 178     5214   5643   7755    550    847   -196
ATOM   2825  CA  ARG A 178      -4.588  49.937  67.272  1.00 48.26           C  
ANISOU 2825  CA  ARG A 178     5031   5634   7672    505    825   -176
ATOM   2826  C   ARG A 178      -5.428  49.803  68.548  1.00 49.80           C  
ANISOU 2826  C   ARG A 178     5177   5798   7946    470   1077   -290
ATOM   2827  O   ARG A 178      -4.853  49.866  69.639  1.00 49.43           O  
ANISOU 2827  O   ARG A 178     5290   5761   7729    407   1230   -380
ATOM   2828  CB  ARG A 178      -3.592  48.759  67.127  1.00 45.92           C  
ANISOU 2828  CB  ARG A 178     4885   5458   7104    416    724   -145
ATOM   2829  CG  ARG A 178      -2.750  48.740  65.832  1.00 48.06           C  
ANISOU 2829  CG  ARG A 178     5221   5774   7264    434    503    -45
ATOM   2830  CD  ARG A 178      -3.575  48.410  64.577  1.00 49.33           C  
ANISOU 2830  CD  ARG A 178     5231   5952   7561    476    326     49
ATOM   2831  NE  ARG A 178      -2.765  48.392  63.350  1.00 48.78           N  
ANISOU 2831  NE  ARG A 178     5245   5937   7351    478    130    138
ATOM   2832  CZ  ARG A 178      -3.112  47.777  62.207  1.00 53.99           C  
ANISOU 2832  CZ  ARG A 178     5934   6554   8026    534     43    209
ATOM   2833  NH1 ARG A 178      -4.261  47.097  62.100  1.00 57.45           N  
ANISOU 2833  NH1 ARG A 178     6321   6877   8630    603    121    202
ATOM   2834  NH2 ARG A 178      -2.307  47.847  61.146  1.00 54.93           N1+
ANISOU 2834  NH2 ARG A 178     6139   6739   7993    518   -113    286
ATOM   2835  H   ARG A 178      -3.777  51.478  68.393  1.00  0.00           H  
ATOM   2836  HA  ARG A 178      -5.255  49.986  66.409  1.00  0.00           H  
ATOM   2837  HB3 ARG A 178      -4.142  47.818  67.195  1.00  0.00           H  
ATOM   2838  HB2 ARG A 178      -2.914  48.761  67.980  1.00  0.00           H  
ATOM   2839  HG3 ARG A 178      -2.030  47.934  65.958  1.00  0.00           H  
ATOM   2840  HG2 ARG A 178      -2.144  49.636  65.698  1.00  0.00           H  
ATOM   2841  HD3 ARG A 178      -4.465  49.029  64.469  1.00  0.00           H  
ATOM   2842  HD2 ARG A 178      -3.929  47.386  64.693  1.00  0.00           H  
ATOM   2843  HE  ARG A 178      -1.905  48.925  63.363  1.00  0.00           H  
ATOM   2844 HH12 ARG A 178      -4.506  46.623  61.244  1.00  0.00           H  
ATOM   2845 HH11 ARG A 178      -4.872  46.999  62.895  1.00  0.00           H  
ATOM   2846 HH22 ARG A 178      -2.528  47.382  60.279  1.00  0.00           H  
ATOM   2847 HH21 ARG A 178      -1.422  48.358  61.157  1.00  0.00           H  
ATOM   2848  N   LEU A 179      -6.754  49.651  68.404  1.00 49.15           N  
ANISOU 2848  N   LEU A 179     4875   5682   8118    506   1121   -287
ATOM   2849  CA  LEU A 179      -7.708  49.504  69.509  1.00 50.48           C  
ANISOU 2849  CA  LEU A 179     4965   5812   8403    478   1388   -396
ATOM   2850  C   LEU A 179      -7.321  48.329  70.419  1.00 48.87           C  
ANISOU 2850  C   LEU A 179     4923   5704   7941    346   1493   -435
ATOM   2851  O   LEU A 179      -7.288  47.193  69.950  1.00 45.25           O  
ANISOU 2851  O   LEU A 179     4473   5330   7391    290   1360   -364
ATOM   2852  CB  LEU A 179      -9.128  49.291  68.936  1.00 51.90           C  
ANISOU 2852  CB  LEU A 179     4852   5954   8913    528   1382   -365
ATOM   2853  CG  LEU A 179      -9.799  50.554  68.354  1.00 59.35           C  
ANISOU 2853  CG  LEU A 179     5592   6771  10187    666   1345   -342
ATOM   2854  CD1 LEU A 179     -10.990  50.180  67.446  1.00 61.97           C  
ANISOU 2854  CD1 LEU A 179     5624   7088  10834    703   1281   -292
ATOM   2855  CD2 LEU A 179     -10.202  51.552  69.462  1.00 61.84           C  
ANISOU 2855  CD2 LEU A 179     5921   6965  10610    711   1620   -477
ATOM   2856  H   LEU A 179      -7.142  49.561  67.476  1.00  0.00           H  
ATOM   2857  HA  LEU A 179      -7.685  50.423  70.097  1.00  0.00           H  
ATOM   2858  HB3 LEU A 179      -9.790  48.878  69.699  1.00  0.00           H  
ATOM   2859  HB2 LEU A 179      -9.065  48.529  68.160  1.00  0.00           H  
ATOM   2860  HG  LEU A 179      -9.065  51.052  67.719  1.00  0.00           H  
ATOM   2861 HD11 LEU A 179     -11.888  50.759  67.662  1.00  0.00           H  
ATOM   2862 HD12 LEU A 179     -10.744  50.360  66.399  1.00  0.00           H  
ATOM   2863 HD13 LEU A 179     -11.261  49.128  67.535  1.00  0.00           H  
ATOM   2864 HD21 LEU A 179      -9.808  52.544  69.247  1.00  0.00           H  
ATOM   2865 HD22 LEU A 179     -11.282  51.655  69.565  1.00  0.00           H  
ATOM   2866 HD23 LEU A 179      -9.827  51.258  70.443  1.00  0.00           H  
ATOM   2867  N   PHE A 180      -7.016  48.638  71.692  1.00 49.94           N  
ANISOU 2867  N   PHE A 180     5201   5820   7954    296   1722   -548
ATOM   2868  CA  PHE A 180      -6.602  47.700  72.748  1.00 50.06           C  
ANISOU 2868  CA  PHE A 180     5404   5917   7701    168   1830   -579
ATOM   2869  C   PHE A 180      -5.275  46.960  72.446  1.00 47.49           C  
ANISOU 2869  C   PHE A 180     5261   5683   7100    117   1617   -497
ATOM   2870  O   PHE A 180      -5.055  45.884  73.001  1.00 49.61           O  
ANISOU 2870  O   PHE A 180     5637   6020   7194     23   1633   -474
ATOM   2871  CB  PHE A 180      -7.748  46.708  73.086  1.00 50.47           C  
ANISOU 2871  CB  PHE A 180     5321   5991   7865    108   1957   -575
ATOM   2872  CG  PHE A 180      -9.073  47.352  73.457  1.00 52.76           C  
ANISOU 2872  CG  PHE A 180     5394   6191   8463    160   2174   -655
ATOM   2873  CD1 PHE A 180      -9.270  47.884  74.748  1.00 52.76           C  
ANISOU 2873  CD1 PHE A 180     5469   6144   8432    128   2478   -790
ATOM   2874  CD2 PHE A 180     -10.059  47.566  72.470  1.00 54.48           C  
ANISOU 2874  CD2 PHE A 180     5329   6365   9005    242   2074   -601
ATOM   2875  CE1 PHE A 180     -10.449  48.553  75.050  1.00 54.81           C  
ANISOU 2875  CE1 PHE A 180     5517   6310   8998    182   2704   -877
ATOM   2876  CE2 PHE A 180     -11.230  48.240  72.790  1.00 55.50           C  
ANISOU 2876  CE2 PHE A 180     5228   6401   9458    300   2273   -673
ATOM   2877  CZ  PHE A 180     -11.426  48.725  74.076  1.00 57.43           C  
ANISOU 2877  CZ  PHE A 180     5541   6593   9688    274   2602   -816
ATOM   2878  H   PHE A 180      -7.070  49.604  71.979  1.00  0.00           H  
ATOM   2879  HA  PHE A 180      -6.412  48.307  73.634  1.00  0.00           H  
ATOM   2880  HB3 PHE A 180      -7.451  46.074  73.923  1.00  0.00           H  
ATOM   2881  HB2 PHE A 180      -7.919  46.026  72.252  1.00  0.00           H  
ATOM   2882  HD1 PHE A 180      -8.508  47.772  75.506  1.00  0.00           H  
ATOM   2883  HD2 PHE A 180      -9.904  47.210  71.464  1.00  0.00           H  
ATOM   2884  HE1 PHE A 180     -10.604  48.949  76.043  1.00  0.00           H  
ATOM   2885  HE2 PHE A 180     -11.986  48.394  72.034  1.00  0.00           H  
ATOM   2886  HZ  PHE A 180     -12.338  49.252  74.319  1.00  0.00           H  
ATOM   2887  N   ASN A 181      -4.432  47.523  71.555  1.00 47.70           N  
ANISOU 2887  N   ASN A 181     5322   5701   7102    180   1430   -451
ATOM   2888  CA  ASN A 181      -3.209  46.916  71.001  1.00 47.20           C  
ANISOU 2888  CA  ASN A 181     5392   5715   6828    149   1225   -372
ATOM   2889  C   ASN A 181      -3.504  45.652  70.152  1.00 47.83           C  
ANISOU 2889  C   ASN A 181     5401   5860   6912    117   1097   -288
ATOM   2890  O   ASN A 181      -2.612  44.823  69.991  1.00 43.25           O  
ANISOU 2890  O   ASN A 181     4947   5344   6142     57   1015   -250
ATOM   2891  CB  ASN A 181      -2.172  46.655  72.141  1.00 45.37           C  
ANISOU 2891  CB  ASN A 181     5393   5520   6326     66   1291   -423
ATOM   2892  CG  ASN A 181      -0.723  46.392  71.699  1.00 48.00           C  
ANISOU 2892  CG  ASN A 181     5847   5916   6474     48   1090   -352
ATOM   2893  OD1 ASN A 181      -0.284  46.840  70.643  1.00 46.74           O  
ANISOU 2893  OD1 ASN A 181     5640   5754   6367    109    932   -296
ATOM   2894  ND2 ASN A 181       0.028  45.646  72.511  1.00 49.00           N  
ANISOU 2894  ND2 ASN A 181     6131   6098   6387    -37   1098   -350
ATOM   2895  H   ASN A 181      -4.690  48.412  71.147  1.00  0.00           H  
ATOM   2896  HA  ASN A 181      -2.784  47.625  70.291  1.00  0.00           H  
ATOM   2897  HB3 ASN A 181      -2.499  45.830  72.775  1.00  0.00           H  
ATOM   2898  HB2 ASN A 181      -2.131  47.533  72.786  1.00  0.00           H  
ATOM   2899 HD22 ASN A 181       0.976  45.411  72.250  1.00  0.00           H  
ATOM   2900 HD21 ASN A 181      -0.349  45.287  73.376  1.00  0.00           H  
ATOM   2901  N   SER A 182      -4.740  45.497  69.644  1.00 51.34           N  
ANISOU 2901  N   SER A 182     5637   6280   7590    159   1072   -261
ATOM   2902  CA  SER A 182      -5.233  44.240  69.079  1.00 52.01           C  
ANISOU 2902  CA  SER A 182     5635   6412   7715    113    981   -206
ATOM   2903  C   SER A 182      -5.204  44.253  67.533  1.00 52.24           C  
ANISOU 2903  C   SER A 182     5578   6462   7808    168    730   -126
ATOM   2904  O   SER A 182      -5.801  45.155  66.942  1.00 52.89           O  
ANISOU 2904  O   SER A 182     5531   6498   8066    252    669   -105
ATOM   2905  CB  SER A 182      -6.668  44.027  69.598  1.00 53.84           C  
ANISOU 2905  CB  SER A 182     5683   6605   8169     94   1144   -243
ATOM   2906  OG  SER A 182      -7.157  42.751  69.235  1.00 56.84           O  
ANISOU 2906  OG  SER A 182     5976   7020   8599     36   1061   -197
ATOM   2907  H   SER A 182      -5.434  46.220  69.780  1.00  0.00           H  
ATOM   2908  HA  SER A 182      -4.645  43.430  69.494  1.00  0.00           H  
ATOM   2909  HB3 SER A 182      -7.343  44.782  69.203  1.00  0.00           H  
ATOM   2910  HB2 SER A 182      -6.697  44.107  70.686  1.00  0.00           H  
ATOM   2911  HG  SER A 182      -6.695  42.094  69.765  1.00  0.00           H  
ATOM   2912  N   PRO A 183      -4.570  43.231  66.901  1.00 50.30           N  
ANISOU 2912  N   PRO A 183     5407   6280   7424    120    584    -81
ATOM   2913  CA  PRO A 183      -4.719  42.945  65.457  1.00 51.17           C  
ANISOU 2913  CA  PRO A 183     5439   6418   7584    151    360    -19
ATOM   2914  C   PRO A 183      -6.147  42.599  64.988  1.00 54.61           C  
ANISOU 2914  C   PRO A 183     5656   6840   8252    143    316     -8
ATOM   2915  O   PRO A 183      -6.433  42.756  63.802  1.00 53.65           O  
ANISOU 2915  O   PRO A 183     5448   6735   8202    177    123     43
ATOM   2916  CB  PRO A 183      -3.781  41.744  65.206  1.00 48.67           C  
ANISOU 2916  CB  PRO A 183     5273   6162   7058     90    264     -4
ATOM   2917  CG  PRO A 183      -2.841  41.696  66.396  1.00 49.66           C  
ANISOU 2917  CG  PRO A 183     5557   6287   7026     46    408    -37
ATOM   2918  CD  PRO A 183      -3.678  42.258  67.528  1.00 51.63           C  
ANISOU 2918  CD  PRO A 183     5743   6491   7385     36    614    -86
ATOM   2919  HA  PRO A 183      -4.364  43.813  64.901  1.00  0.00           H  
ATOM   2920  HB3 PRO A 183      -3.239  41.827  64.263  1.00  0.00           H  
ATOM   2921  HB2 PRO A 183      -4.342  40.808  65.174  1.00  0.00           H  
ATOM   2922  HG3 PRO A 183      -1.987  42.345  66.214  1.00  0.00           H  
ATOM   2923  HG2 PRO A 183      -2.460  40.699  66.614  1.00  0.00           H  
ATOM   2924  HD2 PRO A 183      -4.279  41.475  67.992  1.00  0.00           H  
ATOM   2925  HD3 PRO A 183      -3.024  42.702  68.274  1.00  0.00           H  
ATOM   2926  N   LEU A 184      -6.994  42.110  65.911  1.00 56.50           N  
ANISOU 2926  N   LEU A 184     5811   7052   8603     92    493    -52
ATOM   2927  CA  LEU A 184      -8.343  41.605  65.639  1.00 59.49           C  
ANISOU 2927  CA  LEU A 184     5968   7414   9219     65    476    -50
ATOM   2928  C   LEU A 184      -9.373  42.716  65.351  1.00 63.86           C  
ANISOU 2928  C   LEU A 184     6298   7910  10057    156    480    -44
ATOM   2929  O   LEU A 184     -10.412  42.426  64.760  1.00 64.82           O  
ANISOU 2929  O   LEU A 184     6206   8020  10405    149    410    -29
ATOM   2930  CB  LEU A 184      -8.821  40.742  66.834  1.00 59.66           C  
ANISOU 2930  CB  LEU A 184     5989   7423   9257    -34    692    -94
ATOM   2931  CG  LEU A 184      -7.822  39.679  67.359  1.00 55.63           C  
ANISOU 2931  CG  LEU A 184     5687   6949   8499   -125    698    -87
ATOM   2932  CD1 LEU A 184      -8.401  38.962  68.598  1.00 55.55           C  
ANISOU 2932  CD1 LEU A 184     5696   6916   8495   -220    935   -114
ATOM   2933  CD2 LEU A 184      -7.374  38.688  66.264  1.00 56.91           C  
ANISOU 2933  CD2 LEU A 184     5836   7143   8644   -160    476    -53
ATOM   2934  H   LEU A 184      -6.682  42.022  66.867  1.00  0.00           H  
ATOM   2935  HA  LEU A 184      -8.291  40.974  64.749  1.00  0.00           H  
ATOM   2936  HB3 LEU A 184      -9.754  40.249  66.557  1.00  0.00           H  
ATOM   2937  HB2 LEU A 184      -9.073  41.403  67.665  1.00  0.00           H  
ATOM   2938  HG  LEU A 184      -6.923  40.191  67.704  1.00  0.00           H  
ATOM   2939 HD11 LEU A 184      -8.194  37.892  68.609  1.00  0.00           H  
ATOM   2940 HD12 LEU A 184      -7.982  39.378  69.514  1.00  0.00           H  
ATOM   2941 HD13 LEU A 184      -9.483  39.079  68.666  1.00  0.00           H  
ATOM   2942 HD21 LEU A 184      -7.375  37.653  66.603  1.00  0.00           H  
ATOM   2943 HD22 LEU A 184      -8.014  38.734  65.383  1.00  0.00           H  
ATOM   2944 HD23 LEU A 184      -6.356  38.910  65.940  1.00  0.00           H  
ATOM   2945  N   LYS A 185      -9.078  43.953  65.786  1.00 67.30           N  
ANISOU 2945  N   LYS A 185     6774   8299  10498    241    555    -57
ATOM   2946  CA  LYS A 185      -9.945  45.122  65.652  1.00 71.35           C  
ANISOU 2946  CA  LYS A 185     7081   8733  11297    343    570    -50
ATOM   2947  C   LYS A 185      -9.696  45.826  64.298  1.00 74.12           C  
ANISOU 2947  C   LYS A 185     7400   9088  11672    423    290     49
ATOM   2948  O   LYS A 185      -8.532  46.088  63.988  1.00 72.27           O  
ANISOU 2948  O   LYS A 185     7358   8905  11195    416    166     87
ATOM   2949  CB  LYS A 185      -9.616  46.085  66.813  1.00 71.35           C  
ANISOU 2949  CB  LYS A 185     7147   8660  11302    389    807   -124
ATOM   2950  CG  LYS A 185      -9.966  45.546  68.215  1.00 68.84           C  
ANISOU 2950  CG  LYS A 185     6891   8342  10925    304   1098   -222
ATOM   2951  CD  LYS A 185     -11.470  45.366  68.472  1.00 69.46           C  
ANISOU 2951  CD  LYS A 185     6719   8384  11287    282   1231   -253
ATOM   2952  CE  LYS A 185     -11.755  44.891  69.903  1.00 66.89           C  
ANISOU 2952  CE  LYS A 185     6460   8047  10908    200   1561   -352
ATOM   2953  NZ  LYS A 185     -13.197  44.697  70.127  1.00 68.44           N1+
ANISOU 2953  NZ  LYS A 185     6391   8199  11412    182   1722   -386
ATOM   2954  H   LYS A 185      -8.190  44.113  66.239  1.00  0.00           H  
ATOM   2955  HA  LYS A 185     -10.974  44.795  65.764  1.00  0.00           H  
ATOM   2956  HB3 LYS A 185     -10.153  47.022  66.664  1.00  0.00           H  
ATOM   2957  HB2 LYS A 185      -8.555  46.341  66.790  1.00  0.00           H  
ATOM   2958  HG3 LYS A 185      -9.562  46.227  68.962  1.00  0.00           H  
ATOM   2959  HG2 LYS A 185      -9.464  44.593  68.378  1.00  0.00           H  
ATOM   2960  HD3 LYS A 185     -11.885  44.639  67.773  1.00  0.00           H  
ATOM   2961  HD2 LYS A 185     -11.986  46.308  68.283  1.00  0.00           H  
ATOM   2962  HE3 LYS A 185     -11.384  45.617  70.625  1.00  0.00           H  
ATOM   2963  HE2 LYS A 185     -11.240  43.949  70.098  1.00  0.00           H  
ATOM   2964  HZ1 LYS A 185     -13.549  44.003  69.485  1.00  0.00           H  
ATOM   2965  HZ2 LYS A 185     -13.351  44.385  71.076  1.00  0.00           H  
ATOM   2966  HZ3 LYS A 185     -13.683  45.570  69.978  1.00  0.00           H  
ATOM   2967  N   PRO A 186     -10.768  46.153  63.529  1.00 78.68           N  
ANISOU 2967  N   PRO A 186     7736   9614  12545    497    187     96
ATOM   2968  CA  PRO A 186     -10.681  47.001  62.312  1.00 80.61           C  
ANISOU 2968  CA  PRO A 186     7964   9855  12810    576    -81    209
ATOM   2969  C   PRO A 186     -10.015  48.365  62.396  1.00 80.81           C  
ANISOU 2969  C   PRO A 186     8120   9817  12769    661    -42    231
ATOM   2970  O   PRO A 186      -9.735  48.923  63.458  1.00 82.99           O  
ANISOU 2970  O   PRO A 186     8333   9992  13209    723    151    176
ATOM   2971  CB  PRO A 186     -12.155  47.164  61.880  1.00 83.38           C  
ANISOU 2971  CB  PRO A 186     8002  10145  13535    639   -167    250
ATOM   2972  CG  PRO A 186     -12.856  45.935  62.422  1.00 84.09           C  
ANISOU 2972  CG  PRO A 186     7953  10246  13752    556     -6    165
ATOM   2973  CD  PRO A 186     -12.145  45.697  63.745  1.00 80.80           C  
ANISOU 2973  CD  PRO A 186     7728   9834  13139    497    283     63
ATOM   2974  HA  PRO A 186     -10.164  46.404  61.559  1.00  0.00           H  
ATOM   2975  HXT PRO A 186      -9.808  48.831  61.433  1.00  0.00           H  
ATOM   2976  HB3 PRO A 186     -12.272  47.261  60.800  1.00  0.00           H  
ATOM   2977  HB2 PRO A 186     -12.610  48.046  62.337  1.00  0.00           H  
ATOM   2978  HG3 PRO A 186     -12.675  45.092  61.754  1.00  0.00           H  
ATOM   2979  HG2 PRO A 186     -13.935  46.059  62.524  1.00  0.00           H  
ATOM   2980  HD2 PRO A 186     -12.595  46.293  64.542  1.00  0.00           H  
ATOM   2981  HD3 PRO A 186     -12.216  44.642  64.012  1.00  0.00           H  
ATOM   2982  N   THR A 196      -1.497  43.095  51.840  1.00 69.03           N  
ANISOU 2982  N   THR A 196     8322   9241   8666    133  -1510    497
ATOM   2983  CA  THR A 196      -0.450  42.042  51.989  1.00 66.78           C  
ANISOU 2983  CA  THR A 196     8157   8980   8235     86  -1372    382
ATOM   2984  C   THR A 196      -0.524  41.360  53.394  1.00 62.13           C  
ANISOU 2984  C   THR A 196     7479   8331   7798     89  -1211    299
ATOM   2985  O   THR A 196      -0.569  42.022  54.437  1.00 63.68           O  
ANISOU 2985  O   THR A 196     7592   8466   8139    144  -1112    331
ATOM   2986  CB  THR A 196       1.015  42.543  51.757  1.00 66.91           C  
ANISOU 2986  CB  THR A 196     8328   9011   8083    105  -1266    416
ATOM   2987  OG1 THR A 196       1.957  41.480  51.798  1.00 69.33           O  
ANISOU 2987  OG1 THR A 196     8728   9334   8280     67  -1138    306
ATOM   2988  CG2 THR A 196       1.508  43.670  52.684  1.00 68.20           C  
ANISOU 2988  CG2 THR A 196     8437   9099   8378    178  -1154    485
ATOM   2989  H1  THR A 196      -1.502  43.470  50.900  1.00  0.00           H  
ATOM   2990  H2  THR A 196      -2.420  42.696  51.958  1.00  0.00           H  
ATOM   2991  HA  THR A 196      -0.644  41.274  51.236  1.00  0.00           H  
ATOM   2992  HB  THR A 196       1.056  42.934  50.739  1.00  0.00           H  
ATOM   2993  HG1 THR A 196       2.001  41.073  50.923  1.00  0.00           H  
ATOM   2994 HG21 THR A 196       2.491  44.029  52.382  1.00  0.00           H  
ATOM   2995 HG22 THR A 196       0.825  44.520  52.650  1.00  0.00           H  
ATOM   2996 HG23 THR A 196       1.576  43.348  53.722  1.00  0.00           H  
ATOM   2997  N   PHE A 197      -0.502  40.021  53.387  1.00 57.72           N  
ANISOU 2997  N   PHE A 197     6946   7784   7202     27  -1187    193
ATOM   2998  CA  PHE A 197      -0.368  39.200  54.594  1.00 53.23           C  
ANISOU 2998  CA  PHE A 197     6351   7162   6712     19  -1023    123
ATOM   2999  C   PHE A 197       1.045  38.587  54.710  1.00 47.38           C  
ANISOU 2999  C   PHE A 197     5757   6433   5814      3   -924     59
ATOM   3000  O   PHE A 197       1.298  37.862  55.671  1.00 42.70           O  
ANISOU 3000  O   PHE A 197     5165   5799   5259    -14   -821      2
ATOM   3001  CB  PHE A 197      -1.452  38.097  54.577  1.00 54.61           C  
ANISOU 3001  CB  PHE A 197     6418   7313   7017    -40  -1063     62
ATOM   3002  CG  PHE A 197      -2.888  38.592  54.632  1.00 61.74           C  
ANISOU 3002  CG  PHE A 197     7147   8203   8108    -28  -1163    115
ATOM   3003  CD1 PHE A 197      -3.567  38.942  53.445  1.00 69.30           C  
ANISOU 3003  CD1 PHE A 197     8074   9208   9047    -49  -1374    147
ATOM   3004  CD2 PHE A 197      -3.508  38.850  55.873  1.00 66.01           C  
ANISOU 3004  CD2 PHE A 197     7551   8684   8847      2  -1048    132
ATOM   3005  CE1 PHE A 197      -4.848  39.474  53.507  1.00 72.55           C  
ANISOU 3005  CE1 PHE A 197     8300   9603   9663    -32  -1485    203
ATOM   3006  CE2 PHE A 197      -4.790  39.382  55.915  1.00 66.23           C  
ANISOU 3006  CE2 PHE A 197     7391   8690   9083     21  -1127    175
ATOM   3007  CZ  PHE A 197      -5.458  39.688  54.736  1.00 71.20           C  
ANISOU 3007  CZ  PHE A 197     7970   9362   9721      8  -1353    215
ATOM   3008  H   PHE A 197      -0.447  39.519  52.513  1.00  0.00           H  
ATOM   3009  HA  PHE A 197      -0.517  39.806  55.490  1.00  0.00           H  
ATOM   3010  HB3 PHE A 197      -1.308  37.420  55.420  1.00  0.00           H  
ATOM   3011  HB2 PHE A 197      -1.345  37.488  53.680  1.00  0.00           H  
ATOM   3012  HD1 PHE A 197      -3.094  38.793  52.485  1.00  0.00           H  
ATOM   3013  HD2 PHE A 197      -2.994  38.621  56.794  1.00  0.00           H  
ATOM   3014  HE1 PHE A 197      -5.369  39.728  52.596  1.00  0.00           H  
ATOM   3015  HE2 PHE A 197      -5.268  39.561  56.866  1.00  0.00           H  
ATOM   3016  HZ  PHE A 197      -6.455  40.103  54.776  1.00  0.00           H  
ATOM   3017  N   TRP A 198       1.931  38.873  53.734  1.00 43.93           N  
ANISOU 3017  N   TRP A 198     5438   6046   5210      9   -949     78
ATOM   3018  CA  TRP A 198       3.254  38.259  53.547  1.00 40.46           C  
ANISOU 3018  CA  TRP A 198     5122   5620   4633     -8   -862      7
ATOM   3019  C   TRP A 198       4.253  38.529  54.688  1.00 37.58           C  
ANISOU 3019  C   TRP A 198     4764   5211   4305     29   -708      7
ATOM   3020  O   TRP A 198       5.157  37.722  54.898  1.00 37.23           O  
ANISOU 3020  O   TRP A 198     4774   5152   4218     19   -635    -59
ATOM   3021  CB  TRP A 198       3.866  38.739  52.208  1.00 40.81           C  
ANISOU 3021  CB  TRP A 198     5288   5732   4487    -17   -905     30
ATOM   3022  CG  TRP A 198       3.024  38.691  50.961  1.00 42.86           C  
ANISOU 3022  CG  TRP A 198     5574   6049   4660    -63  -1079     39
ATOM   3023  CD1 TRP A 198       1.946  37.902  50.744  1.00 40.18           C  
ANISOU 3023  CD1 TRP A 198     5168   5708   4388   -108  -1199     -8
ATOM   3024  CD2 TRP A 198       3.220  39.435  49.718  1.00 47.29           C  
ANISOU 3024  CD2 TRP A 198     6243   6680   5044    -77  -1162    104
ATOM   3025  NE1 TRP A 198       1.435  38.146  49.488  1.00 45.71           N  
ANISOU 3025  NE1 TRP A 198     5926   6477   4965   -149  -1370     18
ATOM   3026  CE2 TRP A 198       2.188  39.070  48.801  1.00 44.42           C  
ANISOU 3026  CE2 TRP A 198     5879   6361   4637   -131  -1350     91
ATOM   3027  CE3 TRP A 198       4.160  40.393  49.272  1.00 47.93           C  
ANISOU 3027  CE3 TRP A 198     6425   6790   4998    -58  -1097    176
ATOM   3028  CZ2 TRP A 198       2.094  39.620  47.511  1.00 51.54           C  
ANISOU 3028  CZ2 TRP A 198     6892   7340   5350   -164  -1487    155
ATOM   3029  CZ3 TRP A 198       4.075  40.957  47.982  1.00 49.84           C  
ANISOU 3029  CZ3 TRP A 198     6778   7103   5055    -92  -1211    244
ATOM   3030  CH2 TRP A 198       3.046  40.571  47.101  1.00 51.34           C  
ANISOU 3030  CH2 TRP A 198     6980   7343   5184   -144  -1411    237
ATOM   3031  H   TRP A 198       1.650  39.510  53.003  1.00  0.00           H  
ATOM   3032  HA  TRP A 198       3.099  37.182  53.485  1.00  0.00           H  
ATOM   3033  HB3 TRP A 198       4.779  38.178  52.005  1.00  0.00           H  
ATOM   3034  HB2 TRP A 198       4.177  39.780  52.316  1.00  0.00           H  
ATOM   3035  HD1 TRP A 198       1.547  37.203  51.460  1.00  0.00           H  
ATOM   3036  HE1 TRP A 198       0.614  37.677  49.124  1.00  0.00           H  
ATOM   3037  HE3 TRP A 198       4.956  40.701  49.934  1.00  0.00           H  
ATOM   3038  HZ2 TRP A 198       1.303  39.314  46.843  1.00  0.00           H  
ATOM   3039  HZ3 TRP A 198       4.807  41.687  47.670  1.00  0.00           H  
ATOM   3040  HH2 TRP A 198       2.989  41.002  46.112  1.00  0.00           H  
ATOM   3041  N   TYR A 199       4.068  39.652  55.388  1.00 36.24           N  
ANISOU 3041  N   TYR A 199     4537   5013   4219     72   -666     78
ATOM   3042  CA  TYR A 199       4.972  40.138  56.431  1.00 35.08           C  
ANISOU 3042  CA  TYR A 199     4403   4829   4096    100   -541     82
ATOM   3043  C   TYR A 199       4.434  39.852  57.846  1.00 33.57           C  
ANISOU 3043  C   TYR A 199     4140   4585   4029     98   -479     66
ATOM   3044  O   TYR A 199       5.109  40.181  58.819  1.00 33.34           O  
ANISOU 3044  O   TYR A 199     4124   4527   4016    114   -391     71
ATOM   3045  CB  TYR A 199       5.245  41.642  56.187  1.00 35.27           C  
ANISOU 3045  CB  TYR A 199     4442   4854   4106    138   -525    160
ATOM   3046  CG  TYR A 199       5.710  41.930  54.764  1.00 35.92           C  
ANISOU 3046  CG  TYR A 199     4607   4992   4050    127   -579    190
ATOM   3047  CD1 TYR A 199       7.056  41.721  54.404  1.00 33.42           C  
ANISOU 3047  CD1 TYR A 199     4374   4699   3624    113   -507    155
ATOM   3048  CD2 TYR A 199       4.782  42.323  53.776  1.00 33.66           C  
ANISOU 3048  CD2 TYR A 199     4317   4736   3738    124   -703    251
ATOM   3049  CE1 TYR A 199       7.460  41.844  53.061  1.00 37.34           C  
ANISOU 3049  CE1 TYR A 199     4960   5252   3976     92   -529    174
ATOM   3050  CE2 TYR A 199       5.190  42.472  52.438  1.00 38.25           C  
ANISOU 3050  CE2 TYR A 199     5002   5377   4155    100   -753    282
ATOM   3051  CZ  TYR A 199       6.525  42.219  52.075  1.00 37.37           C  
ANISOU 3051  CZ  TYR A 199     4986   5292   3923     81   -652    239
ATOM   3052  OH  TYR A 199       6.896  42.353  50.770  1.00 40.67           O  
ANISOU 3052  OH  TYR A 199     5518   5771   4165     48   -670    265
ATOM   3053  H   TYR A 199       3.314  40.261  55.110  1.00  0.00           H  
ATOM   3054  HA  TYR A 199       5.930  39.621  56.363  1.00  0.00           H  
ATOM   3055  HB3 TYR A 199       5.998  42.005  56.890  1.00  0.00           H  
ATOM   3056  HB2 TYR A 199       4.348  42.229  56.390  1.00  0.00           H  
ATOM   3057  HD1 TYR A 199       7.777  41.441  55.155  1.00  0.00           H  
ATOM   3058  HD2 TYR A 199       3.745  42.480  54.031  1.00  0.00           H  
ATOM   3059  HE1 TYR A 199       8.492  41.658  52.805  1.00  0.00           H  
ATOM   3060  HE2 TYR A 199       4.470  42.754  51.684  1.00  0.00           H  
ATOM   3061  HH  TYR A 199       7.824  42.118  50.598  1.00  0.00           H  
ATOM   3062  N   ARG A 200       3.236  39.256  57.951  1.00 34.77           N  
ANISOU 3062  N   ARG A 200     4224   4725   4261     69   -523     43
ATOM   3063  CA  ARG A 200       2.632  38.836  59.214  1.00 35.73           C  
ANISOU 3063  CA  ARG A 200     4278   4799   4500     55   -450     34
ATOM   3064  C   ARG A 200       3.280  37.554  59.748  1.00 34.56           C  
ANISOU 3064  C   ARG A 200     4180   4621   4331     19   -394    -11
ATOM   3065  O   ARG A 200       3.497  36.606  58.992  1.00 38.55           O  
ANISOU 3065  O   ARG A 200     4707   5126   4816    -15   -445    -56
ATOM   3066  CB  ARG A 200       1.116  38.619  59.043  1.00 37.24           C  
ANISOU 3066  CB  ARG A 200     4350   4984   4816     34   -514     38
ATOM   3067  CG  ARG A 200       0.352  39.892  58.653  1.00 44.69           C  
ANISOU 3067  CG  ARG A 200     5211   5929   5840     80   -557     97
ATOM   3068  CD  ARG A 200      -1.161  39.731  58.842  1.00 48.04           C  
ANISOU 3068  CD  ARG A 200     5480   6325   6449     67   -570     99
ATOM   3069  NE  ARG A 200      -1.908  40.865  58.281  1.00 54.60           N  
ANISOU 3069  NE  ARG A 200     6216   7144   7385    126   -622    162
ATOM   3070  CZ  ARG A 200      -3.189  41.170  58.552  1.00 59.71           C  
ANISOU 3070  CZ  ARG A 200     6697   7763   8225    136   -654    178
ATOM   3071  NH1 ARG A 200      -3.921  40.432  59.399  1.00 63.56           N  
ANISOU 3071  NH1 ARG A 200     7089   8237   8823     79   -630    133
ATOM   3072  NH2 ARG A 200      -3.746  42.234  57.960  1.00 59.01           N1+
ANISOU 3072  NH2 ARG A 200     6528   7652   8241    204   -709    245
ATOM   3073  H   ARG A 200       2.741  38.989  57.111  1.00  0.00           H  
ATOM   3074  HA  ARG A 200       2.779  39.635  59.944  1.00  0.00           H  
ATOM   3075  HB3 ARG A 200       0.711  38.247  59.985  1.00  0.00           H  
ATOM   3076  HB2 ARG A 200       0.923  37.834  58.310  1.00  0.00           H  
ATOM   3077  HG3 ARG A 200       0.613  40.268  57.663  1.00  0.00           H  
ATOM   3078  HG2 ARG A 200       0.672  40.658  59.361  1.00  0.00           H  
ATOM   3079  HD3 ARG A 200      -1.344  39.808  59.914  1.00  0.00           H  
ATOM   3080  HD2 ARG A 200      -1.533  38.753  58.538  1.00  0.00           H  
ATOM   3081  HE  ARG A 200      -1.416  41.423  57.596  1.00  0.00           H  
ATOM   3082 HH12 ARG A 200      -4.882  40.673  59.597  1.00  0.00           H  
ATOM   3083 HH11 ARG A 200      -3.514  39.624  59.847  1.00  0.00           H  
ATOM   3084 HH22 ARG A 200      -4.707  42.481  58.148  1.00  0.00           H  
ATOM   3085 HH21 ARG A 200      -3.212  42.796  57.312  1.00  0.00           H  
ATOM   3086  N   ALA A 201       3.529  37.562  61.064  1.00 32.86           N  
ANISOU 3086  N   ALA A 201     3987   4375   4125     22   -295      1
ATOM   3087  CA  ALA A 201       4.032  36.436  61.844  1.00 33.60           C  
ANISOU 3087  CA  ALA A 201     4132   4430   4203     -9   -250    -16
ATOM   3088  C   ALA A 201       2.979  35.317  61.979  1.00 34.10           C  
ANISOU 3088  C   ALA A 201     4146   4455   4356    -66   -251    -33
ATOM   3089  O   ALA A 201       1.785  35.609  61.900  1.00 35.27           O  
ANISOU 3089  O   ALA A 201     4201   4603   4595    -82   -246    -27
ATOM   3090  CB  ALA A 201       4.455  37.000  63.204  1.00 31.91           C  
ANISOU 3090  CB  ALA A 201     3960   4199   3966     -5   -162     12
ATOM   3091  H   ALA A 201       3.315  38.393  61.595  1.00  0.00           H  
ATOM   3092  HA  ALA A 201       4.902  36.038  61.333  1.00  0.00           H  
ATOM   3093  HB1 ALA A 201       5.081  36.294  63.745  1.00  0.00           H  
ATOM   3094  HB2 ALA A 201       5.040  37.914  63.094  1.00  0.00           H  
ATOM   3095  HB3 ALA A 201       3.589  37.238  63.823  1.00  0.00           H  
ATOM   3096  N   PRO A 202       3.420  34.051  62.172  1.00 32.45           N  
ANISOU 3096  N   PRO A 202     3987   4203   4140    -96   -255    -53
ATOM   3097  CA  PRO A 202       2.498  32.903  62.240  1.00 34.02           C  
ANISOU 3097  CA  PRO A 202     4140   4353   4433   -159   -261    -72
ATOM   3098  C   PRO A 202       1.525  32.923  63.434  1.00 34.55           C  
ANISOU 3098  C   PRO A 202     4155   4393   4580   -201   -165    -33
ATOM   3099  O   PRO A 202       0.446  32.351  63.308  1.00 35.68           O  
ANISOU 3099  O   PRO A 202     4206   4516   4834   -252   -169    -47
ATOM   3100  CB  PRO A 202       3.426  31.679  62.248  1.00 35.30           C  
ANISOU 3100  CB  PRO A 202     4383   4453   4576   -172   -268    -90
ATOM   3101  CG  PRO A 202       4.724  32.193  62.848  1.00 32.84           C  
ANISOU 3101  CG  PRO A 202     4144   4159   4174   -113   -255    -70
ATOM   3102  CD  PRO A 202       4.809  33.610  62.294  1.00 34.81           C  
ANISOU 3102  CD  PRO A 202     4371   4486   4368    -70   -264    -63
ATOM   3103  HA  PRO A 202       1.893  32.875  61.332  1.00  0.00           H  
ATOM   3104  HB3 PRO A 202       3.604  31.354  61.222  1.00  0.00           H  
ATOM   3105  HB2 PRO A 202       3.021  30.825  62.790  1.00  0.00           H  
ATOM   3106  HG3 PRO A 202       5.592  31.580  62.604  1.00  0.00           H  
ATOM   3107  HG2 PRO A 202       4.631  32.231  63.935  1.00  0.00           H  
ATOM   3108  HD2 PRO A 202       5.423  34.243  62.932  1.00  0.00           H  
ATOM   3109  HD3 PRO A 202       5.246  33.595  61.298  1.00  0.00           H  
ATOM   3110  N   GLU A 203       1.884  33.609  64.536  1.00 35.45           N  
ANISOU 3110  N   GLU A 203     4323   4508   4638   -188    -76      8
ATOM   3111  CA  GLU A 203       1.001  33.839  65.678  1.00 36.32           C  
ANISOU 3111  CA  GLU A 203     4402   4601   4798   -229     44     35
ATOM   3112  C   GLU A 203      -0.157  34.810  65.367  1.00 37.66           C  
ANISOU 3112  C   GLU A 203     4437   4797   5074   -216     69     17
ATOM   3113  O   GLU A 203      -1.250  34.576  65.875  1.00 36.02           O  
ANISOU 3113  O   GLU A 203     4151   4564   4971   -264    158     19
ATOM   3114  CB  GLU A 203       1.789  34.221  66.956  1.00 38.31           C  
ANISOU 3114  CB  GLU A 203     4763   4857   4937   -223    124     71
ATOM   3115  CG  GLU A 203       2.561  35.561  66.971  1.00 38.03           C  
ANISOU 3115  CG  GLU A 203     4746   4870   4833   -159    116     59
ATOM   3116  CD  GLU A 203       3.931  35.556  66.286  1.00 37.03           C  
ANISOU 3116  CD  GLU A 203     4693   4759   4616   -116     26     62
ATOM   3117  OE1 GLU A 203       4.328  34.524  65.702  1.00 31.74           O  
ANISOU 3117  OE1 GLU A 203     4024   4075   3960   -110    -52     51
ATOM   3118  OE2 GLU A 203       4.591  36.612  66.368  1.00 32.98           O1-
ANISOU 3118  OE2 GLU A 203     4233   4268   4030    -91     40     67
ATOM   3119  H   GLU A 203       2.811  34.014  64.608  1.00  0.00           H  
ATOM   3120  HA  GLU A 203       0.539  32.876  65.900  1.00  0.00           H  
ATOM   3121  HB3 GLU A 203       2.472  33.409  67.206  1.00  0.00           H  
ATOM   3122  HB2 GLU A 203       1.085  34.242  67.788  1.00  0.00           H  
ATOM   3123  HG3 GLU A 203       2.739  35.840  68.010  1.00  0.00           H  
ATOM   3124  HG2 GLU A 203       1.956  36.365  66.551  1.00  0.00           H  
ATOM   3125  N   LEU A 204       0.053  35.828  64.506  1.00 38.27           N  
ANISOU 3125  N   LEU A 204     4483   4918   5139   -151     -6      6
ATOM   3126  CA  LEU A 204      -1.018  36.707  64.000  1.00 40.63           C  
ANISOU 3126  CA  LEU A 204     4642   5230   5564   -125    -19      2
ATOM   3127  C   LEU A 204      -2.053  35.934  63.170  1.00 41.45           C  
ANISOU 3127  C   LEU A 204     4633   5326   5791   -170   -103    -15
ATOM   3128  O   LEU A 204      -3.249  36.174  63.321  1.00 45.38           O  
ANISOU 3128  O   LEU A 204     4993   5805   6445   -192    -58    -17
ATOM   3129  CB  LEU A 204      -0.445  37.853  63.136  1.00 39.92           C  
ANISOU 3129  CB  LEU A 204     4559   5180   5430    -50   -107     13
ATOM   3130  CG  LEU A 204       0.404  38.887  63.898  1.00 37.45           C  
ANISOU 3130  CG  LEU A 204     4321   4868   5040     -5    -31     24
ATOM   3131  CD1 LEU A 204       1.147  39.800  62.901  1.00 37.16           C  
ANISOU 3131  CD1 LEU A 204     4305   4862   4952     54   -129     45
ATOM   3132  CD2 LEU A 204      -0.455  39.687  64.899  1.00 41.18           C  
ANISOU 3132  CD2 LEU A 204     4719   5308   5620      3    101     15
ATOM   3133  H   LEU A 204       0.969  35.956  64.099  1.00  0.00           H  
ATOM   3134  HA  LEU A 204      -1.544  37.133  64.854  1.00  0.00           H  
ATOM   3135  HB3 LEU A 204      -1.262  38.383  62.641  1.00  0.00           H  
ATOM   3136  HB2 LEU A 204       0.146  37.429  62.326  1.00  0.00           H  
ATOM   3137  HG  LEU A 204       1.166  38.354  64.468  1.00  0.00           H  
ATOM   3138 HD11 LEU A 204       1.085  40.857  63.159  1.00  0.00           H  
ATOM   3139 HD12 LEU A 204       2.202  39.534  62.860  1.00  0.00           H  
ATOM   3140 HD13 LEU A 204       0.756  39.705  61.889  1.00  0.00           H  
ATOM   3141 HD21 LEU A 204      -0.242  40.756  64.888  1.00  0.00           H  
ATOM   3142 HD22 LEU A 204      -1.520  39.574  64.696  1.00  0.00           H  
ATOM   3143 HD23 LEU A 204      -0.288  39.339  65.918  1.00  0.00           H  
ATOM   3144  N   LEU A 205      -1.558  34.995  62.348  1.00 41.66           N  
ANISOU 3144  N   LEU A 205     4715   5362   5753   -187   -221    -37
ATOM   3145  CA  LEU A 205      -2.347  34.078  61.527  1.00 41.95           C  
ANISOU 3145  CA  LEU A 205     4668   5390   5882   -242   -326    -70
ATOM   3146  C   LEU A 205      -3.002  32.941  62.335  1.00 42.42           C  
ANISOU 3146  C   LEU A 205     4677   5384   6055   -329   -239    -78
ATOM   3147  O   LEU A 205      -3.817  32.216  61.770  1.00 41.91           O  
ANISOU 3147  O   LEU A 205     4496   5303   6124   -386   -300   -102
ATOM   3148  CB  LEU A 205      -1.440  33.508  60.421  1.00 43.29           C  
ANISOU 3148  CB  LEU A 205     4939   5578   5932   -245   -448   -112
ATOM   3149  CG  LEU A 205      -0.873  34.567  59.450  1.00 41.43           C  
ANISOU 3149  CG  LEU A 205     4762   5408   5570   -176   -528   -101
ATOM   3150  CD1 LEU A 205       0.232  33.953  58.583  1.00 35.84           C  
ANISOU 3150  CD1 LEU A 205     4183   4709   4727   -179   -574   -150
ATOM   3151  CD2 LEU A 205      -1.968  35.236  58.593  1.00 43.10           C  
ANISOU 3151  CD2 LEU A 205     4868   5662   5844   -168   -658    -86
ATOM   3152  H   LEU A 205      -0.557  34.872  62.297  1.00  0.00           H  
ATOM   3153  HA  LEU A 205      -3.156  34.644  61.066  1.00  0.00           H  
ATOM   3154  HB3 LEU A 205      -1.986  32.763  59.841  1.00  0.00           H  
ATOM   3155  HB2 LEU A 205      -0.616  32.972  60.893  1.00  0.00           H  
ATOM   3156  HG  LEU A 205      -0.389  35.349  60.035  1.00  0.00           H  
ATOM   3157 HD11 LEU A 205       0.806  34.730  58.077  1.00  0.00           H  
ATOM   3158 HD12 LEU A 205       0.935  33.377  59.184  1.00  0.00           H  
ATOM   3159 HD13 LEU A 205      -0.183  33.281  57.831  1.00  0.00           H  
ATOM   3160 HD21 LEU A 205      -1.730  35.208  57.530  1.00  0.00           H  
ATOM   3161 HD22 LEU A 205      -2.938  34.753  58.716  1.00  0.00           H  
ATOM   3162 HD23 LEU A 205      -2.089  36.283  58.870  1.00  0.00           H  
ATOM   3163  N   LEU A 206      -2.650  32.809  63.625  1.00 40.26           N  
ANISOU 3163  N   LEU A 206     4495   5073   5729   -347   -104    -51
ATOM   3164  CA  LEU A 206      -3.243  31.861  64.567  1.00 41.37           C  
ANISOU 3164  CA  LEU A 206     4608   5148   5964   -434      5    -36
ATOM   3165  C   LEU A 206      -4.066  32.566  65.668  1.00 40.91           C  
ANISOU 3165  C   LEU A 206     4474   5087   5984   -448    175     -9
ATOM   3166  O   LEU A 206      -4.456  31.910  66.635  1.00 42.52           O  
ANISOU 3166  O   LEU A 206     4686   5242   6228   -524    308     16
ATOM   3167  CB  LEU A 206      -2.148  30.927  65.131  1.00 38.86           C  
ANISOU 3167  CB  LEU A 206     4449   4777   5539   -459     37    -11
ATOM   3168  CG  LEU A 206      -1.607  29.902  64.112  1.00 38.75           C  
ANISOU 3168  CG  LEU A 206     4490   4735   5497   -462    -96    -56
ATOM   3169  CD1 LEU A 206      -0.369  29.169  64.670  1.00 38.06           C  
ANISOU 3169  CD1 LEU A 206     4538   4575   5349   -478    -52    -17
ATOM   3170  CD2 LEU A 206      -2.702  28.919  63.654  1.00 37.22           C  
ANISOU 3170  CD2 LEU A 206     4184   4508   5450   -536   -176   -111
ATOM   3171  H   LEU A 206      -1.952  33.430  64.010  1.00  0.00           H  
ATOM   3172  HA  LEU A 206      -3.961  31.250  64.029  1.00  0.00           H  
ATOM   3173  HB3 LEU A 206      -2.534  30.358  65.974  1.00  0.00           H  
ATOM   3174  HB2 LEU A 206      -1.332  31.534  65.522  1.00  0.00           H  
ATOM   3175  HG  LEU A 206      -1.277  30.443  63.226  1.00  0.00           H  
ATOM   3176 HD11 LEU A 206       0.475  29.259  63.985  1.00  0.00           H  
ATOM   3177 HD12 LEU A 206      -0.048  29.579  65.628  1.00  0.00           H  
ATOM   3178 HD13 LEU A 206      -0.544  28.105  64.832  1.00  0.00           H  
ATOM   3179 HD21 LEU A 206      -2.313  27.915  63.511  1.00  0.00           H  
ATOM   3180 HD22 LEU A 206      -3.517  28.849  64.374  1.00  0.00           H  
ATOM   3181 HD23 LEU A 206      -3.134  29.235  62.705  1.00  0.00           H  
ATOM   3182  N   GLY A 207      -4.378  33.861  65.480  1.00 40.12           N  
ANISOU 3182  N   GLY A 207     4302   5032   5908   -377    180    -15
ATOM   3183  CA  GLY A 207      -5.347  34.585  66.299  1.00 40.36           C  
ANISOU 3183  CA  GLY A 207     4228   5055   6054   -379    343    -14
ATOM   3184  C   GLY A 207      -4.725  35.262  67.526  1.00 39.43           C  
ANISOU 3184  C   GLY A 207     4235   4942   5804   -357    500     -3
ATOM   3185  O   GLY A 207      -5.407  35.358  68.546  1.00 40.86           O  
ANISOU 3185  O   GLY A 207     4371   5103   6049   -390    682    -11
ATOM   3186  H   GLY A 207      -4.020  34.340  64.664  1.00  0.00           H  
ATOM   3187  HA3 GLY A 207      -6.164  33.929  66.606  1.00  0.00           H  
ATOM   3188  HA2 GLY A 207      -5.791  35.364  65.682  1.00  0.00           H  
ATOM   3189  N   ALA A 208      -3.468  35.744  67.443  1.00 36.86           N  
ANISOU 3189  N   ALA A 208     4063   4645   5299   -307    438      7
ATOM   3190  CA  ALA A 208      -2.819  36.559  68.481  1.00 37.79           C  
ANISOU 3190  CA  ALA A 208     4301   4771   5286   -291    560      8
ATOM   3191  C   ALA A 208      -3.621  37.833  68.789  1.00 39.44           C  
ANISOU 3191  C   ALA A 208     4397   4977   5610   -247    667    -30
ATOM   3192  O   ALA A 208      -3.861  38.639  67.889  1.00 37.78           O  
ANISOU 3192  O   ALA A 208     4061   4773   5518   -181    573    -39
ATOM   3193  CB  ALA A 208      -1.386  36.935  68.068  1.00 37.43           C  
ANISOU 3193  CB  ALA A 208     4393   4756   5072   -237    449     18
ATOM   3194  H   ALA A 208      -2.934  35.596  66.598  1.00  0.00           H  
ATOM   3195  HA  ALA A 208      -2.760  35.950  69.385  1.00  0.00           H  
ATOM   3196  HB1 ALA A 208      -0.926  37.601  68.801  1.00  0.00           H  
ATOM   3197  HB2 ALA A 208      -0.745  36.058  67.997  1.00  0.00           H  
ATOM   3198  HB3 ALA A 208      -1.364  37.446  67.107  1.00  0.00           H  
ATOM   3199  N   ARG A 209      -4.032  37.962  70.060  1.00 42.07           N  
ANISOU 3199  N   ARG A 209     4777   5295   5912   -287    865    -50
ATOM   3200  CA  ARG A 209      -4.912  39.028  70.538  1.00 44.91           C  
ANISOU 3200  CA  ARG A 209     5022   5633   6410   -256   1020   -103
ATOM   3201  C   ARG A 209      -4.222  40.389  70.711  1.00 44.81           C  
ANISOU 3201  C   ARG A 209     5081   5623   6323   -181   1029   -139
ATOM   3202  O   ARG A 209      -4.939  41.377  70.856  1.00 47.40           O  
ANISOU 3202  O   ARG A 209     5297   5917   6798   -129   1120   -186
ATOM   3203  CB  ARG A 209      -5.582  38.603  71.860  1.00 45.54           C  
ANISOU 3203  CB  ARG A 209     5125   5690   6487   -345   1265   -123
ATOM   3204  CG  ARG A 209      -6.386  37.295  71.769  1.00 52.34           C  
ANISOU 3204  CG  ARG A 209     5851   6527   7507   -421   1305    -97
ATOM   3205  CD  ARG A 209      -7.081  36.960  73.094  0.00 56.41           C  
ANISOU 3205  CD  ARG A 209     6419   7025   7991   -523   1564   -105
ATOM   3206  NE  ARG A 209      -7.987  35.814  72.955  0.00 57.94           N  
ANISOU 3206  NE  ARG A 209     6492   7187   8336   -611   1607    -72
ATOM   3207  CZ  ARG A 209      -8.690  35.253  73.954  0.00 59.70           C  
ANISOU 3207  CZ  ARG A 209     6738   7386   8558   -718   1836    -62
ATOM   3208  NH1 ARG A 209      -9.477  34.203  73.691  0.00 60.82           N  
ANISOU 3208  NH1 ARG A 209     6757   7491   8860   -803   1861    -29
ATOM   3209  NH2 ARG A 209      -8.620  35.726  75.207  0.00 60.46           N1+
ANISOU 3209  NH2 ARG A 209     6988   7496   8487   -750   2042    -88
ATOM   3210  H   ARG A 209      -3.790  37.250  70.733  1.00  0.00           H  
ATOM   3211  HA  ARG A 209      -5.695  39.168  69.793  1.00  0.00           H  
ATOM   3212  HB3 ARG A 209      -6.260  39.396  72.178  1.00  0.00           H  
ATOM   3213  HB2 ARG A 209      -4.831  38.514  72.648  1.00  0.00           H  
ATOM   3214  HG3 ARG A 209      -5.683  36.491  71.545  1.00  0.00           H  
ATOM   3215  HG2 ARG A 209      -7.104  37.310  70.949  1.00  0.00           H  
ATOM   3216  HD3 ARG A 209      -7.568  37.830  73.535  1.00  0.00           H  
ATOM   3217  HD2 ARG A 209      -6.320  36.630  73.802  1.00  0.00           H  
ATOM   3218  HE  ARG A 209      -8.074  35.428  72.025  1.00  0.00           H  
ATOM   3219 HH12 ARG A 209     -10.015  33.768  74.427  1.00  0.00           H  
ATOM   3220 HH11 ARG A 209      -9.542  33.834  72.753  1.00  0.00           H  
ATOM   3221 HH22 ARG A 209      -9.153  35.299  75.950  1.00  0.00           H  
ATOM   3222 HH21 ARG A 209      -8.028  36.517  75.414  1.00  0.00           H  
ATOM   3223  N   HIS A 210      -2.877  40.422  70.697  1.00 43.73           N  
ANISOU 3223  N   HIS A 210     5118   5515   5982   -176    937   -121
ATOM   3224  CA  HIS A 210      -2.076  41.634  70.863  1.00 43.37           C  
ANISOU 3224  CA  HIS A 210     5151   5467   5863   -122    938   -157
ATOM   3225  C   HIS A 210      -0.847  41.615  69.946  1.00 40.42           C  
ANISOU 3225  C   HIS A 210     4847   5123   5388    -80    741   -117
ATOM   3226  O   HIS A 210      -0.270  40.552  69.713  1.00 43.25           O  
ANISOU 3226  O   HIS A 210     5269   5510   5654   -111    638    -72
ATOM   3227  CB  HIS A 210      -1.646  41.799  72.336  1.00 45.58           C  
ANISOU 3227  CB  HIS A 210     5598   5748   5971   -183   1094   -201
ATOM   3228  CG  HIS A 210      -2.784  41.953  73.313  1.00 53.27           C  
ANISOU 3228  CG  HIS A 210     6526   6694   7021   -231   1328   -253
ATOM   3229  ND1 HIS A 210      -3.643  43.039  73.305  1.00 58.84           N  
ANISOU 3229  ND1 HIS A 210     7105   7350   7902   -178   1461   -327
ATOM   3230  CD2 HIS A 210      -3.234  41.133  74.325  1.00 55.94           C  
ANISOU 3230  CD2 HIS A 210     6922   7040   7292   -327   1466   -241
ATOM   3231  CE1 HIS A 210      -4.546  42.834  74.266  1.00 61.95           C  
ANISOU 3231  CE1 HIS A 210     7473   7727   8338   -240   1685   -369
ATOM   3232  NE2 HIS A 210      -4.362  41.696  74.925  1.00 56.53           N  
ANISOU 3232  NE2 HIS A 210     6905   7079   7497   -337   1694   -314
ATOM   3233  H   HIS A 210      -2.357  39.569  70.550  1.00  0.00           H  
ATOM   3234  HA  HIS A 210      -2.686  42.488  70.586  1.00  0.00           H  
ATOM   3235  HB3 HIS A 210      -1.005  42.677  72.439  1.00  0.00           H  
ATOM   3236  HB2 HIS A 210      -1.042  40.945  72.646  1.00  0.00           H  
ATOM   3237  HD1 HIS A 210      -3.614  43.832  72.679  1.00  0.00           H  
ATOM   3238  HD2 HIS A 210      -2.846  40.180  74.654  1.00  0.00           H  
ATOM   3239  HE1 HIS A 210      -5.350  43.522  74.483  1.00  0.00           H  
ATOM   3240  N   TYR A 211      -0.440  42.816  69.499  1.00 37.78           N  
ANISOU 3240  N   TYR A 211     4495   4773   5086    -11    699   -134
ATOM   3241  CA  TYR A 211       0.854  43.062  68.862  1.00 35.41           C  
ANISOU 3241  CA  TYR A 211     4274   4499   4681     18    552   -103
ATOM   3242  C   TYR A 211       1.986  43.026  69.901  1.00 34.19           C  
ANISOU 3242  C   TYR A 211     4291   4362   4339    -32    580   -121
ATOM   3243  O   TYR A 211       1.787  43.427  71.049  1.00 30.82           O  
ANISOU 3243  O   TYR A 211     3931   3919   3862    -71    717   -173
ATOM   3244  CB  TYR A 211       0.844  44.423  68.144  1.00 35.73           C  
ANISOU 3244  CB  TYR A 211     4256   4505   4814     94    516   -107
ATOM   3245  CG  TYR A 211       0.014  44.492  66.875  1.00 39.79           C  
ANISOU 3245  CG  TYR A 211     4617   5010   5492    150    426    -63
ATOM   3246  CD1 TYR A 211       0.545  44.019  65.657  1.00 40.71           C  
ANISOU 3246  CD1 TYR A 211     4732   5167   5569    168    258     -5
ATOM   3247  CD2 TYR A 211      -1.267  45.078  66.894  1.00 42.59           C  
ANISOU 3247  CD2 TYR A 211     4826   5314   6042    183    506    -82
ATOM   3248  CE1 TYR A 211      -0.192  44.148  64.464  1.00 44.89           C  
ANISOU 3248  CE1 TYR A 211     5138   5695   6222    210    153     40
ATOM   3249  CE2 TYR A 211      -2.003  45.208  65.703  1.00 46.29           C  
ANISOU 3249  CE2 TYR A 211     5145   5774   6669    235    391    -31
ATOM   3250  CZ  TYR A 211      -1.464  44.755  64.485  1.00 47.28           C  
ANISOU 3250  CZ  TYR A 211     5291   5948   6724    244    205     33
ATOM   3251  OH  TYR A 211      -2.170  44.917  63.330  1.00 54.34           O  
ANISOU 3251  OH  TYR A 211     6057   6843   7747    284     71     89
ATOM   3252  H   TYR A 211      -0.986  43.638  69.724  1.00  0.00           H  
ATOM   3253  HA  TYR A 211       1.024  42.281  68.121  1.00  0.00           H  
ATOM   3254  HB3 TYR A 211       1.864  44.682  67.856  1.00  0.00           H  
ATOM   3255  HB2 TYR A 211       0.527  45.207  68.829  1.00  0.00           H  
ATOM   3256  HD1 TYR A 211       1.531  43.580  65.634  1.00  0.00           H  
ATOM   3257  HD2 TYR A 211      -1.676  45.464  67.811  1.00  0.00           H  
ATOM   3258  HE1 TYR A 211       0.231  43.797  63.533  1.00  0.00           H  
ATOM   3259  HE2 TYR A 211      -2.981  45.662  65.731  1.00  0.00           H  
ATOM   3260  HH  TYR A 211      -1.714  44.572  62.558  1.00  0.00           H  
ATOM   3261  N   THR A 212       3.157  42.551  69.456  1.00 33.00           N  
ANISOU 3261  N   THR A 212     4206   4244   4087    -32    448    -82
ATOM   3262  CA  THR A 212       4.356  42.366  70.271  1.00 33.65           C  
ANISOU 3262  CA  THR A 212     4432   4347   4008    -76    426    -81
ATOM   3263  C   THR A 212       5.591  42.888  69.511  1.00 32.07           C  
ANISOU 3263  C   THR A 212     4248   4160   3777    -39    304    -65
ATOM   3264  O   THR A 212       5.507  43.195  68.320  1.00 32.80           O  
ANISOU 3264  O   THR A 212     4261   4256   3946     11    235    -42
ATOM   3265  CB  THR A 212       4.577  40.860  70.612  1.00 35.71           C  
ANISOU 3265  CB  THR A 212     4746   4626   4196   -124    386    -31
ATOM   3266  OG1 THR A 212       4.992  40.089  69.498  1.00 34.10           O  
ANISOU 3266  OG1 THR A 212     4476   4432   4049    -88    269      6
ATOM   3267  CG2 THR A 212       3.361  40.181  71.263  1.00 29.11           C  
ANISOU 3267  CG2 THR A 212     3899   3775   3387   -178    517    -33
ATOM   3268  H   THR A 212       3.249  42.282  68.487  1.00  0.00           H  
ATOM   3269  HA  THR A 212       4.279  42.936  71.198  1.00  0.00           H  
ATOM   3270  HB  THR A 212       5.390  40.799  71.337  1.00  0.00           H  
ATOM   3271  HG1 THR A 212       4.220  39.881  68.965  1.00  0.00           H  
ATOM   3272 HG21 THR A 212       3.602  39.164  71.576  1.00  0.00           H  
ATOM   3273 HG22 THR A 212       3.035  40.728  72.148  1.00  0.00           H  
ATOM   3274 HG23 THR A 212       2.513  40.119  70.581  1.00  0.00           H  
ATOM   3275  N   LYS A 213       6.729  42.957  70.223  1.00 31.88           N  
ANISOU 3275  N   LYS A 213     4327   4147   3637    -73    274    -73
ATOM   3276  CA  LYS A 213       8.041  43.267  69.651  1.00 31.88           C  
ANISOU 3276  CA  LYS A 213     4335   4162   3616    -51    163    -55
ATOM   3277  C   LYS A 213       8.498  42.208  68.633  1.00 32.06           C  
ANISOU 3277  C   LYS A 213     4314   4208   3660    -26     71     -4
ATOM   3278  O   LYS A 213       8.995  42.583  67.575  1.00 33.34           O  
ANISOU 3278  O   LYS A 213     4425   4378   3864     14     18      8
ATOM   3279  CB  LYS A 213       9.085  43.424  70.775  1.00 32.53           C  
ANISOU 3279  CB  LYS A 213     4526   4255   3579   -103    128    -69
ATOM   3280  CG  LYS A 213       8.837  44.644  71.675  1.00 37.76           C  
ANISOU 3280  CG  LYS A 213     5251   4890   4205   -137    215   -144
ATOM   3281  CD  LYS A 213       9.928  44.828  72.738  1.00 43.34           C  
ANISOU 3281  CD  LYS A 213     6070   5614   4784   -199    151   -164
ATOM   3282  CE  LYS A 213       9.665  46.048  73.631  1.00 55.11           C  
ANISOU 3282  CE  LYS A 213     7634   7070   6233   -241    250   -262
ATOM   3283  NZ  LYS A 213      10.767  46.264  74.584  1.00 56.17           N1+
ANISOU 3283  NZ  LYS A 213     7890   7222   6231   -317    175   -298
ATOM   3284  H   LYS A 213       6.722  42.708  71.202  1.00  0.00           H  
ATOM   3285  HA  LYS A 213       7.956  44.218  69.122  1.00  0.00           H  
ATOM   3286  HB3 LYS A 213      10.076  43.530  70.329  1.00  0.00           H  
ATOM   3287  HB2 LYS A 213       9.123  42.518  71.381  1.00  0.00           H  
ATOM   3288  HG3 LYS A 213       7.868  44.551  72.166  1.00  0.00           H  
ATOM   3289  HG2 LYS A 213       8.785  45.541  71.058  1.00  0.00           H  
ATOM   3290  HD3 LYS A 213      10.896  44.931  72.246  1.00  0.00           H  
ATOM   3291  HD2 LYS A 213       9.992  43.930  73.353  1.00  0.00           H  
ATOM   3292  HE3 LYS A 213       8.736  45.921  74.187  1.00  0.00           H  
ATOM   3293  HE2 LYS A 213       9.549  46.940  73.017  1.00  0.00           H  
ATOM   3294  HZ1 LYS A 213      10.574  47.089  75.136  1.00  0.00           H  
ATOM   3295  HZ2 LYS A 213      10.861  45.463  75.190  1.00  0.00           H  
ATOM   3296  HZ3 LYS A 213      11.628  46.406  74.075  1.00  0.00           H  
ATOM   3297  N   ALA A 214       8.272  40.920  68.954  1.00 30.96           N  
ANISOU 3297  N   ALA A 214     4200   4072   3492    -53     63     24
ATOM   3298  CA  ALA A 214       8.597  39.763  68.117  1.00 30.54           C  
ANISOU 3298  CA  ALA A 214     4112   4022   3471    -32    -11     57
ATOM   3299  C   ALA A 214       7.884  39.749  66.753  1.00 30.36           C  
ANISOU 3299  C   ALA A 214     3998   4005   3532      7    -22     48
ATOM   3300  O   ALA A 214       8.478  39.278  65.784  1.00 32.27           O  
ANISOU 3300  O   ALA A 214     4219   4258   3785     33    -86     52
ATOM   3301  CB  ALA A 214       8.290  38.476  68.899  1.00 29.24           C  
ANISOU 3301  CB  ALA A 214     3991   3837   3282    -74      0     90
ATOM   3302  H   ALA A 214       7.828  40.707  69.835  1.00  0.00           H  
ATOM   3303  HA  ALA A 214       9.672  39.792  67.925  1.00  0.00           H  
ATOM   3304  HB1 ALA A 214       8.544  37.586  68.323  1.00  0.00           H  
ATOM   3305  HB2 ALA A 214       8.864  38.433  69.825  1.00  0.00           H  
ATOM   3306  HB3 ALA A 214       7.233  38.406  69.160  1.00  0.00           H  
ATOM   3307  N   ILE A 215       6.652  40.284  66.688  1.00 30.65           N  
ANISOU 3307  N   ILE A 215     3982   4034   3631     10     38     33
ATOM   3308  CA  ILE A 215       5.878  40.453  65.453  1.00 30.79           C  
ANISOU 3308  CA  ILE A 215     3912   4060   3727     43      1     35
ATOM   3309  C   ILE A 215       6.554  41.408  64.445  1.00 30.81           C  
ANISOU 3309  C   ILE A 215     3910   4080   3716     84    -49     44
ATOM   3310  O   ILE A 215       6.571  41.099  63.252  1.00 32.80           O  
ANISOU 3310  O   ILE A 215     4139   4355   3966    102   -114     54
ATOM   3311  CB  ILE A 215       4.407  40.885  65.756  1.00 31.73           C  
ANISOU 3311  CB  ILE A 215     3951   4158   3945     41     70     24
ATOM   3312  CG1 ILE A 215       3.611  39.658  66.259  1.00 34.81           C  
ANISOU 3312  CG1 ILE A 215     4323   4535   4367     -8    105     24
ATOM   3313  CG2 ILE A 215       3.666  41.586  64.594  1.00 33.55           C  
ANISOU 3313  CG2 ILE A 215     4091   4396   4260     86      7     39
ATOM   3314  CD1 ILE A 215       2.332  39.970  67.044  1.00 31.35           C  
ANISOU 3314  CD1 ILE A 215     3818   4071   4022    -28    219      7
ATOM   3315  H   ILE A 215       6.228  40.645  67.532  1.00  0.00           H  
ATOM   3316  HA  ILE A 215       5.844  39.474  64.970  1.00  0.00           H  
ATOM   3317  HB  ILE A 215       4.434  41.598  66.579  1.00  0.00           H  
ATOM   3318 HG13 ILE A 215       4.246  39.072  66.922  1.00  0.00           H  
ATOM   3319 HG12 ILE A 215       3.375  39.002  65.421  1.00  0.00           H  
ATOM   3320 HG21 ILE A 215       2.613  41.741  64.815  1.00  0.00           H  
ATOM   3321 HG22 ILE A 215       4.082  42.572  64.386  1.00  0.00           H  
ATOM   3322 HG23 ILE A 215       3.728  41.000  63.678  1.00  0.00           H  
ATOM   3323 HD11 ILE A 215       1.734  39.067  67.167  1.00  0.00           H  
ATOM   3324 HD12 ILE A 215       2.562  40.336  68.041  1.00  0.00           H  
ATOM   3325 HD13 ILE A 215       1.710  40.711  66.547  1.00  0.00           H  
ATOM   3326  N   ASP A 216       7.149  42.503  64.952  1.00 30.43           N  
ANISOU 3326  N   ASP A 216     3894   4019   3649     90    -15     38
ATOM   3327  CA  ASP A 216       7.998  43.416  64.180  1.00 29.70           C  
ANISOU 3327  CA  ASP A 216     3805   3933   3546    116    -49     55
ATOM   3328  C   ASP A 216       9.301  42.750  63.694  1.00 30.21           C  
ANISOU 3328  C   ASP A 216     3898   4028   3553    112   -100     61
ATOM   3329  O   ASP A 216       9.704  43.021  62.566  1.00 31.75           O  
ANISOU 3329  O   ASP A 216     4081   4243   3738    131   -129     79
ATOM   3330  CB  ASP A 216       8.305  44.746  64.914  1.00 31.76           C  
ANISOU 3330  CB  ASP A 216     4097   4159   3812    110      0     37
ATOM   3331  CG  ASP A 216       7.085  45.568  65.358  1.00 30.78           C  
ANISOU 3331  CG  ASP A 216     3930   3986   3778    133     62     27
ATOM   3332  OD1 ASP A 216       5.997  45.403  64.763  1.00 33.29           O  
ANISOU 3332  OD1 ASP A 216     4177   4301   4170    163     48     50
ATOM   3333  OD2 ASP A 216       7.289  46.432  66.240  1.00 33.44           O1-
ANISOU 3333  OD2 ASP A 216     4302   4281   4122    121    123    -11
ATOM   3334  H   ASP A 216       7.086  42.689  65.943  1.00  0.00           H  
ATOM   3335  HA  ASP A 216       7.436  43.674  63.280  1.00  0.00           H  
ATOM   3336  HB3 ASP A 216       8.930  45.381  64.288  1.00  0.00           H  
ATOM   3337  HB2 ASP A 216       8.887  44.512  65.804  1.00  0.00           H  
ATOM   3338  N   ILE A 217       9.919  41.873  64.508  1.00 28.57           N  
ANISOU 3338  N   ILE A 217     3727   3819   3309     88   -106     49
ATOM   3339  CA  ILE A 217      11.155  41.168  64.136  1.00 31.13           C  
ANISOU 3339  CA  ILE A 217     4058   4158   3614     94   -149     50
ATOM   3340  C   ILE A 217      10.954  40.130  63.009  1.00 32.45           C  
ANISOU 3340  C   ILE A 217     4204   4339   3788    110   -173     42
ATOM   3341  O   ILE A 217      11.845  39.999  62.168  1.00 31.59           O  
ANISOU 3341  O   ILE A 217     4086   4246   3670    126   -181     34
ATOM   3342  CB  ILE A 217      11.850  40.455  65.334  1.00 34.28           C  
ANISOU 3342  CB  ILE A 217     4496   4541   3989     70   -173     55
ATOM   3343  CG1 ILE A 217      12.123  41.398  66.528  1.00 33.18           C  
ANISOU 3343  CG1 ILE A 217     4396   4395   3817     39   -162     48
ATOM   3344  CG2 ILE A 217      13.157  39.751  64.918  1.00 33.21           C  
ANISOU 3344  CG2 ILE A 217     4338   4406   3874     89   -219     57
ATOM   3345  CD1 ILE A 217      12.950  42.652  66.216  1.00 37.22           C  
ANISOU 3345  CD1 ILE A 217     4883   4910   4350     45   -162     40
ATOM   3346  H   ILE A 217       9.543  41.684  65.427  1.00  0.00           H  
ATOM   3347  HA  ILE A 217      11.846  41.916  63.745  1.00  0.00           H  
ATOM   3348  HB  ILE A 217      11.178  39.681  65.708  1.00  0.00           H  
ATOM   3349 HG13 ILE A 217      12.609  40.844  67.330  1.00  0.00           H  
ATOM   3350 HG12 ILE A 217      11.177  41.715  66.951  1.00  0.00           H  
ATOM   3351 HG21 ILE A 217      13.719  39.389  65.769  1.00  0.00           H  
ATOM   3352 HG22 ILE A 217      12.982  38.881  64.285  1.00  0.00           H  
ATOM   3353 HG23 ILE A 217      13.803  40.442  64.376  1.00  0.00           H  
ATOM   3354 HD11 ILE A 217      13.166  43.183  67.141  1.00  0.00           H  
ATOM   3355 HD12 ILE A 217      13.901  42.409  65.743  1.00  0.00           H  
ATOM   3356 HD13 ILE A 217      12.409  43.341  65.566  1.00  0.00           H  
ATOM   3357  N   TRP A 218       9.793  39.447  62.976  1.00 30.56           N  
ANISOU 3357  N   TRP A 218     3956   4089   3567    100   -176     36
ATOM   3358  CA  TRP A 218       9.425  38.541  61.883  1.00 30.12           C  
ANISOU 3358  CA  TRP A 218     3885   4042   3518    104   -208     13
ATOM   3359  C   TRP A 218       9.321  39.275  60.534  1.00 30.23           C  
ANISOU 3359  C   TRP A 218     3890   4096   3501    120   -225     15
ATOM   3360  O   TRP A 218       9.834  38.765  59.541  1.00 34.38           O  
ANISOU 3360  O   TRP A 218     4433   4641   3988    126   -235    -12
ATOM   3361  CB  TRP A 218       8.127  37.776  62.217  1.00 29.69           C  
ANISOU 3361  CB  TRP A 218     3807   3968   3506     77   -212      8
ATOM   3362  CG  TRP A 218       7.619  36.840  61.152  1.00 30.03           C  
ANISOU 3362  CG  TRP A 218     3836   4016   3557     68   -258    -27
ATOM   3363  CD1 TRP A 218       6.889  37.211  60.074  1.00 30.11           C  
ANISOU 3363  CD1 TRP A 218     3820   4062   3559     68   -305    -34
ATOM   3364  CD2 TRP A 218       7.852  35.405  60.995  1.00 29.89           C  
ANISOU 3364  CD2 TRP A 218     3839   3961   3555     54   -273    -64
ATOM   3365  NE1 TRP A 218       6.633  36.113  59.281  1.00 36.21           N  
ANISOU 3365  NE1 TRP A 218     4603   4832   4325     45   -349    -84
ATOM   3366  CE2 TRP A 218       7.201  34.971  59.798  1.00 32.95           C  
ANISOU 3366  CE2 TRP A 218     4217   4367   3936     38   -321   -110
ATOM   3367  CE3 TRP A 218       8.542  34.418  61.738  1.00 32.54           C  
ANISOU 3367  CE3 TRP A 218     4204   4243   3918     53   -259    -61
ATOM   3368  CZ2 TRP A 218       7.223  33.633  59.369  1.00 34.75           C  
ANISOU 3368  CZ2 TRP A 218     4465   4554   4185     17   -340   -170
ATOM   3369  CZ3 TRP A 218       8.579  33.074  61.310  1.00 31.81           C  
ANISOU 3369  CZ3 TRP A 218     4123   4100   3865     42   -278   -106
ATOM   3370  CH2 TRP A 218       7.924  32.681  60.127  1.00 32.58           C  
ANISOU 3370  CH2 TRP A 218     4213   4211   3957     23   -310   -169
ATOM   3371  H   TRP A 218       9.102  39.595  63.699  1.00  0.00           H  
ATOM   3372  HA  TRP A 218      10.223  37.802  61.784  1.00  0.00           H  
ATOM   3373  HB3 TRP A 218       7.331  38.486  62.447  1.00  0.00           H  
ATOM   3374  HB2 TRP A 218       8.278  37.192  63.124  1.00  0.00           H  
ATOM   3375  HD1 TRP A 218       6.560  38.220  59.879  1.00  0.00           H  
ATOM   3376  HE1 TRP A 218       6.085  36.171  58.434  1.00  0.00           H  
ATOM   3377  HE3 TRP A 218       9.054  34.698  62.646  1.00  0.00           H  
ATOM   3378  HZ2 TRP A 218       6.708  33.338  58.466  1.00  0.00           H  
ATOM   3379  HZ3 TRP A 218       9.114  32.337  61.887  1.00  0.00           H  
ATOM   3380  HH2 TRP A 218       7.958  31.652  59.803  1.00  0.00           H  
ATOM   3381  N   ALA A 219       8.698  40.466  60.539  1.00 31.28           N  
ANISOU 3381  N   ALA A 219     4001   4235   3650    127   -222     47
ATOM   3382  CA  ALA A 219       8.567  41.336  59.371  1.00 32.62           C  
ANISOU 3382  CA  ALA A 219     4171   4434   3788    142   -250     77
ATOM   3383  C   ALA A 219       9.912  41.873  58.845  1.00 32.86           C  
ANISOU 3383  C   ALA A 219     4239   4483   3765    147   -221     85
ATOM   3384  O   ALA A 219      10.038  42.050  57.636  1.00 34.64           O  
ANISOU 3384  O   ALA A 219     4492   4744   3925    145   -236     93
ATOM   3385  CB  ALA A 219       7.607  42.483  59.707  1.00 34.05           C  
ANISOU 3385  CB  ALA A 219     4313   4594   4032    159   -249    120
ATOM   3386  H   ALA A 219       8.303  40.817  61.401  1.00  0.00           H  
ATOM   3387  HA  ALA A 219       8.112  40.744  58.574  1.00  0.00           H  
ATOM   3388  HB1 ALA A 219       7.426  43.107  58.832  1.00  0.00           H  
ATOM   3389  HB2 ALA A 219       6.641  42.105  60.043  1.00  0.00           H  
ATOM   3390  HB3 ALA A 219       8.005  43.117  60.498  1.00  0.00           H  
ATOM   3391  N   ILE A 220      10.903  42.069  59.736  1.00 32.32           N  
ANISOU 3391  N   ILE A 220     4171   4392   3719    146   -179     81
ATOM   3392  CA  ILE A 220      12.284  42.414  59.377  1.00 32.75           C  
ANISOU 3392  CA  ILE A 220     4235   4456   3750    143   -145     83
ATOM   3393  C   ILE A 220      13.034  41.222  58.742  1.00 34.03           C  
ANISOU 3393  C   ILE A 220     4404   4640   3887    146   -135     37
ATOM   3394  O   ILE A 220      13.837  41.443  57.837  1.00 33.01           O  
ANISOU 3394  O   ILE A 220     4289   4538   3715    143    -96     33
ATOM   3395  CB  ILE A 220      13.099  42.934  60.600  1.00 32.61           C  
ANISOU 3395  CB  ILE A 220     4205   4408   3776    133   -125     82
ATOM   3396  CG1 ILE A 220      12.491  44.240  61.156  1.00 32.33           C  
ANISOU 3396  CG1 ILE A 220     4174   4341   3769    127   -114    110
ATOM   3397  CG2 ILE A 220      14.607  43.146  60.326  1.00 32.33           C  
ANISOU 3397  CG2 ILE A 220     4153   4383   3750    126    -94     77
ATOM   3398  CD1 ILE A 220      12.916  44.554  62.599  1.00 29.46           C  
ANISOU 3398  CD1 ILE A 220     3817   3946   3430    103   -107     86
ATOM   3399  H   ILE A 220      10.722  41.920  60.719  1.00  0.00           H  
ATOM   3400  HA  ILE A 220      12.247  43.214  58.636  1.00  0.00           H  
ATOM   3401  HB  ILE A 220      13.020  42.184  61.386  1.00  0.00           H  
ATOM   3402 HG13 ILE A 220      11.405  44.199  61.127  1.00  0.00           H  
ATOM   3403 HG12 ILE A 220      12.748  45.072  60.503  1.00  0.00           H  
ATOM   3404 HG21 ILE A 220      15.102  43.642  61.157  1.00  0.00           H  
ATOM   3405 HG22 ILE A 220      15.136  42.205  60.172  1.00  0.00           H  
ATOM   3406 HG23 ILE A 220      14.763  43.768  59.444  1.00  0.00           H  
ATOM   3407 HD11 ILE A 220      12.039  44.748  63.214  1.00  0.00           H  
ATOM   3408 HD12 ILE A 220      13.457  43.729  63.063  1.00  0.00           H  
ATOM   3409 HD13 ILE A 220      13.559  45.434  62.639  1.00  0.00           H  
ATOM   3410  N   GLY A 221      12.734  39.990  59.191  1.00 33.20           N  
ANISOU 3410  N   GLY A 221     4292   4512   3812    149   -157      2
ATOM   3411  CA  GLY A 221      13.258  38.751  58.614  1.00 34.50           C  
ANISOU 3411  CA  GLY A 221     4461   4673   3973    157   -147    -53
ATOM   3412  C   GLY A 221      12.669  38.489  57.220  1.00 34.20           C  
ANISOU 3412  C   GLY A 221     4462   4676   3856    147   -146    -82
ATOM   3413  O   GLY A 221      13.386  38.007  56.345  1.00 36.58           O  
ANISOU 3413  O   GLY A 221     4781   4994   4123    149    -95   -127
ATOM   3414  H   GLY A 221      12.073  39.894  59.950  1.00  0.00           H  
ATOM   3415  HA3 GLY A 221      13.005  37.920  59.271  1.00  0.00           H  
ATOM   3416  HA2 GLY A 221      14.345  38.794  58.549  1.00  0.00           H  
ATOM   3417  N   CYS A 222      11.394  38.856  56.999  1.00 33.00           N  
ANISOU 3417  N   CYS A 222     4322   4541   3675    132   -202    -59
ATOM   3418  CA  CYS A 222      10.719  38.810  55.699  1.00 34.22           C  
ANISOU 3418  CA  CYS A 222     4522   4743   3738    113   -238    -75
ATOM   3419  C   CYS A 222      11.339  39.799  54.698  1.00 35.67           C  
ANISOU 3419  C   CYS A 222     4750   4973   3829    107   -201    -38
ATOM   3420  O   CYS A 222      11.569  39.421  53.551  1.00 36.16           O  
ANISOU 3420  O   CYS A 222     4875   5077   3787     86   -184    -77
ATOM   3421  CB  CYS A 222       9.210  39.088  55.811  1.00 35.73           C  
ANISOU 3421  CB  CYS A 222     4689   4938   3949    102   -326    -39
ATOM   3422  SG  CYS A 222       8.375  37.781  56.737  1.00 33.90           S  
ANISOU 3422  SG  CYS A 222     4406   4654   3822     87   -357    -78
ATOM   3423  H   CYS A 222      10.845  39.213  57.770  1.00  0.00           H  
ATOM   3424  HA  CYS A 222      10.857  37.807  55.299  1.00  0.00           H  
ATOM   3425  HB3 CYS A 222       8.749  39.148  54.824  1.00  0.00           H  
ATOM   3426  HB2 CYS A 222       9.028  40.034  56.318  1.00  0.00           H  
ATOM   3427  HG  CYS A 222       7.135  38.238  56.542  1.00  0.00           H  
ATOM   3428  N   ILE A 223      11.617  41.027  55.169  1.00 36.26           N  
ANISOU 3428  N   ILE A 223     4802   5037   3938    119   -184     35
ATOM   3429  CA  ILE A 223      12.273  42.096  54.415  1.00 37.43           C  
ANISOU 3429  CA  ILE A 223     4989   5212   4019    107   -140     90
ATOM   3430  C   ILE A 223      13.742  41.765  54.069  1.00 35.86           C  
ANISOU 3430  C   ILE A 223     4798   5024   3801     99    -33     39
ATOM   3431  O   ILE A 223      14.154  42.050  52.948  1.00 34.40           O  
ANISOU 3431  O   ILE A 223     4676   4884   3510     74     20     39
ATOM   3432  CB  ILE A 223      12.172  43.461  55.170  1.00 38.13           C  
ANISOU 3432  CB  ILE A 223     5045   5263   4181    118   -139    170
[truncated: 263,468 more chars]
